# Supplementary material
Source: Royal Society of Chemistry journal article supplement (doi:10.1039/d6ob00599c)
Supplement: d6ob00599c1.pdf [file d6ob00599c1.pdf]

## Supplementary Information

### Synthesis of meta-substituted phenols and 1-estradiol conjugated analogues of suberoylanilide hydroxamic acid (SAHA)

Chanoknun Boonyaratsewee<sup>a</sup>, Kitiya Rujimongkon<sup>b</sup>, Wannarasmi Ketchart,<sup>\*b</sup> Somsak Pianwanit,<sup>\*a</sup>  
Yongsak Sritana-anant<sup>\*a</sup>

<sup>a</sup> Department of Chemistry, Faculty of Science, Chulalongkorn University, Bangkok 10330, Thailand

<sup>b</sup> Department of Pharmacology, Faculty of Medicine, Chulalongkorn University, Bangkok 10330, Thailand

**Corresponding Author:** Yongsak Sritana-anant, Department of Chemistry, Faculty of Science,  
Chulalongkorn University, Bangkok 10330, Thailand

**Email:** [yongsak.s@chula.ac.th](mailto:yongsak.s@chula.ac.th)

---

## Table of Contents

| Contents                                                          | Page |
|-------------------------------------------------------------------|------|
| 1. Characterization of synthetic compounds                        | 1    |
| 2. Molecular Docking of targeted compounds with estrogen receptor | 68   |
| 3. The bioactivity of targeted compounds against cell line        | 71   |

# Characterization of synthetic compounds

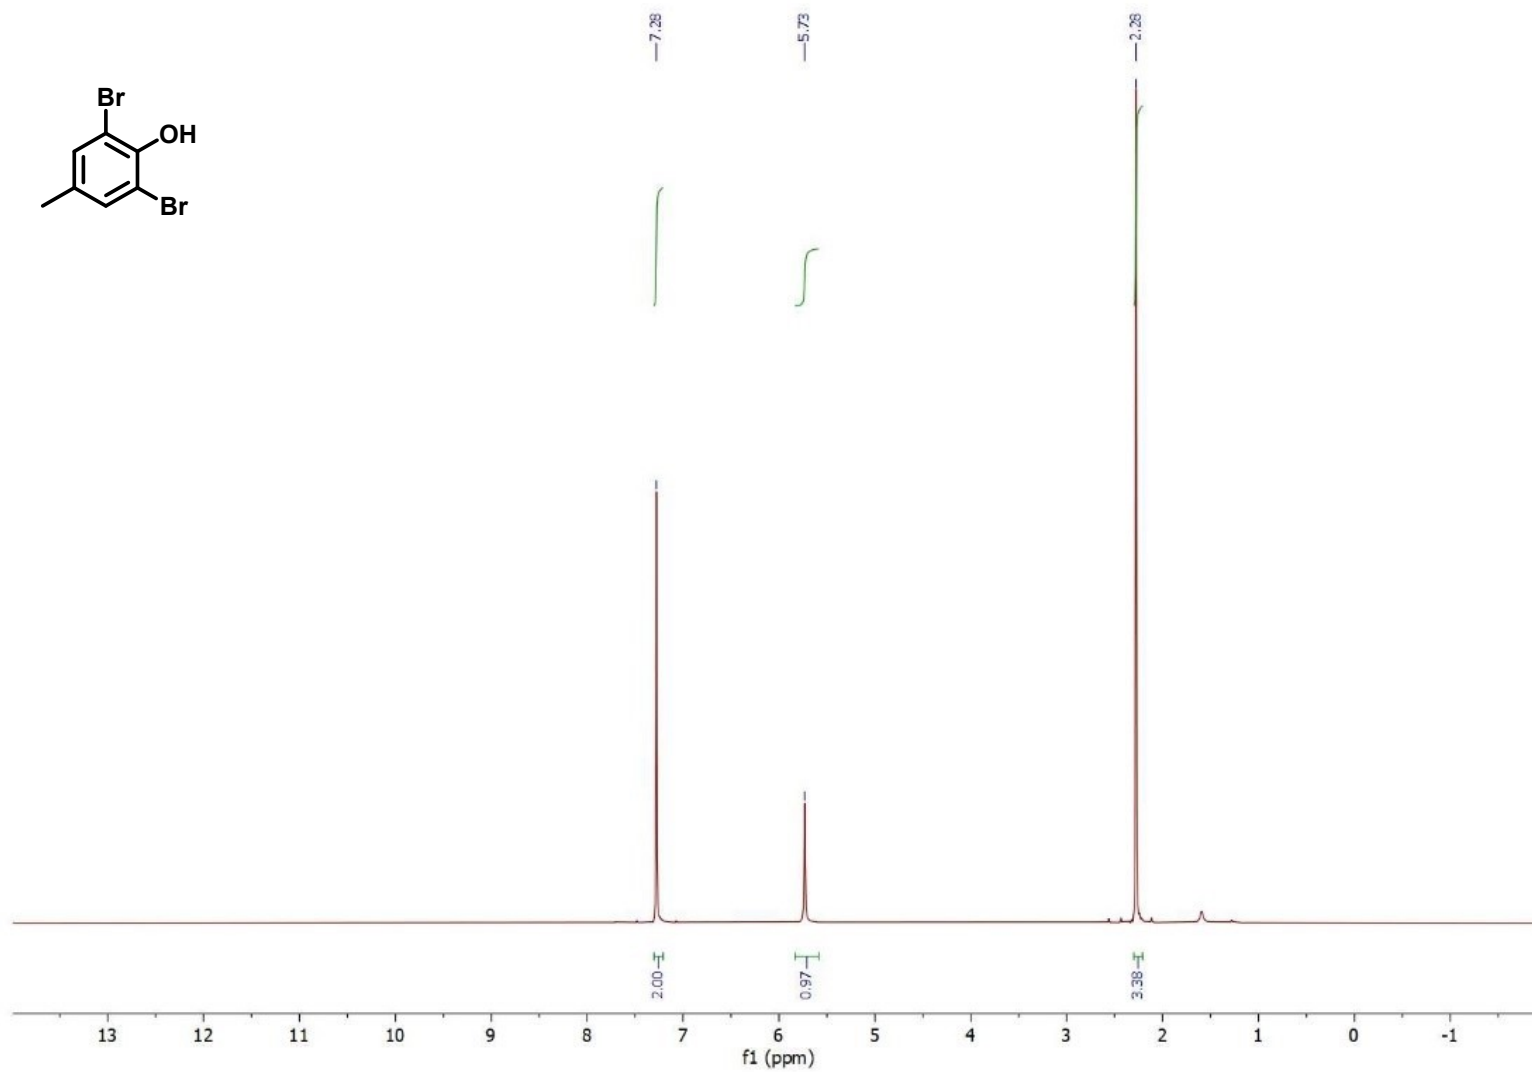

Figure S1. <sup>1</sup>H-NMR spectrum of compound 1

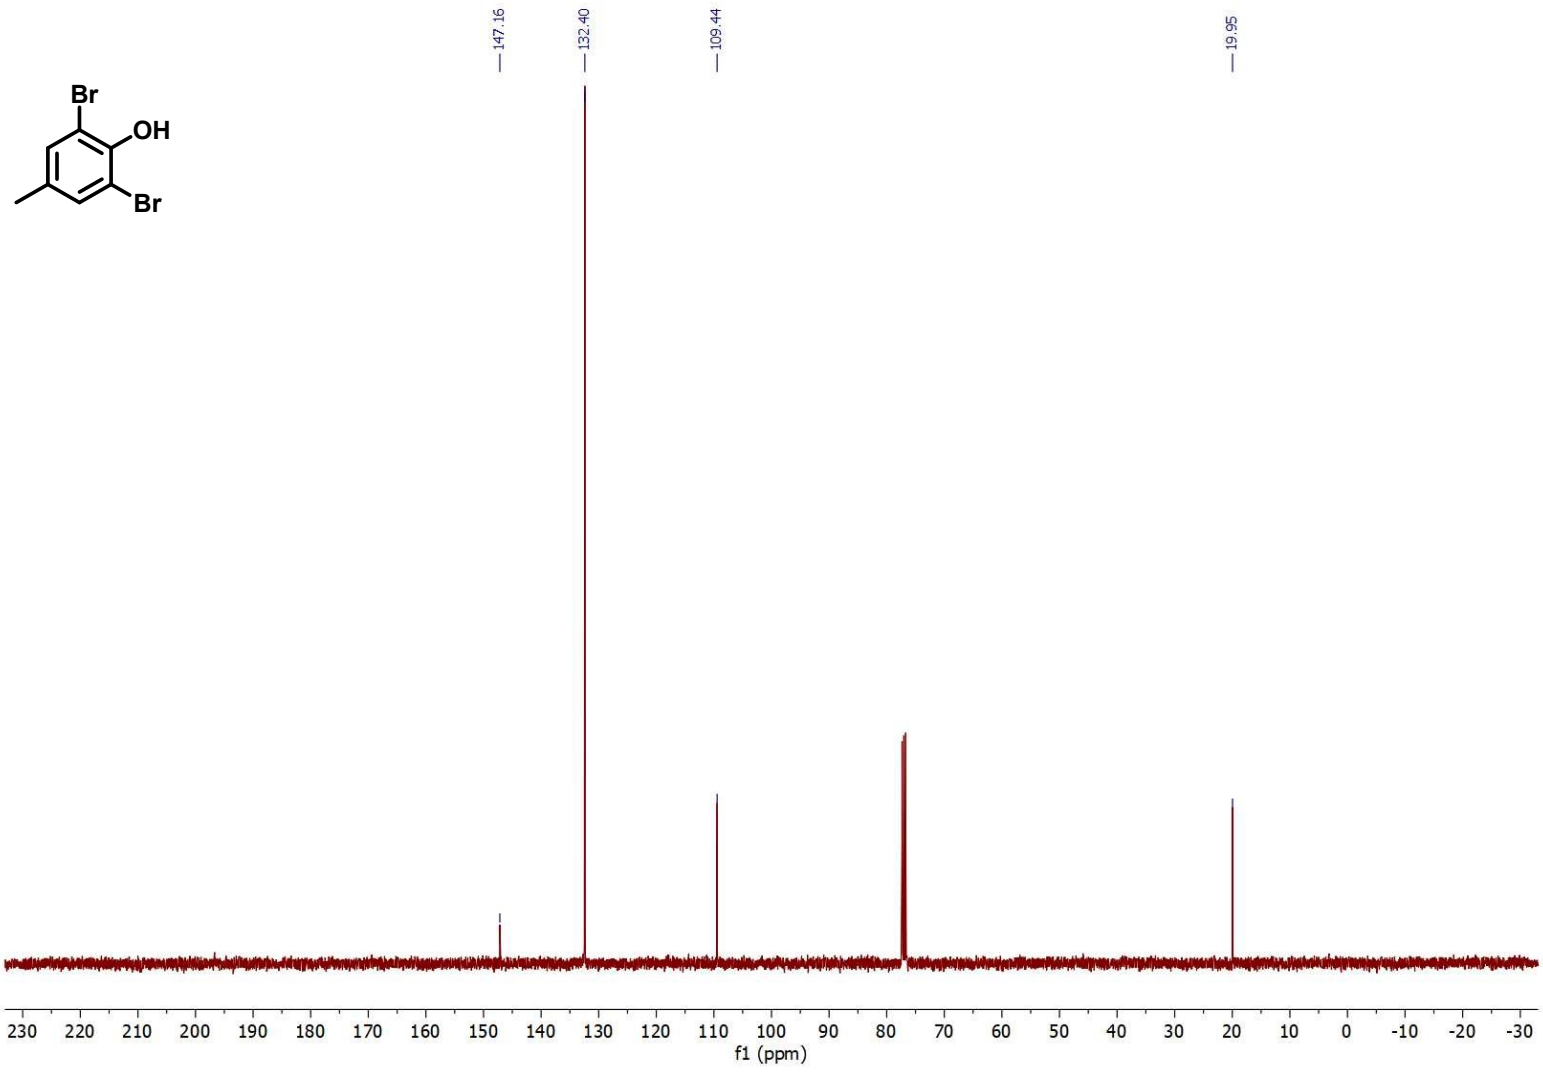

Figure S2. <sup>13</sup>C-NMR spectrum of **compound 1**

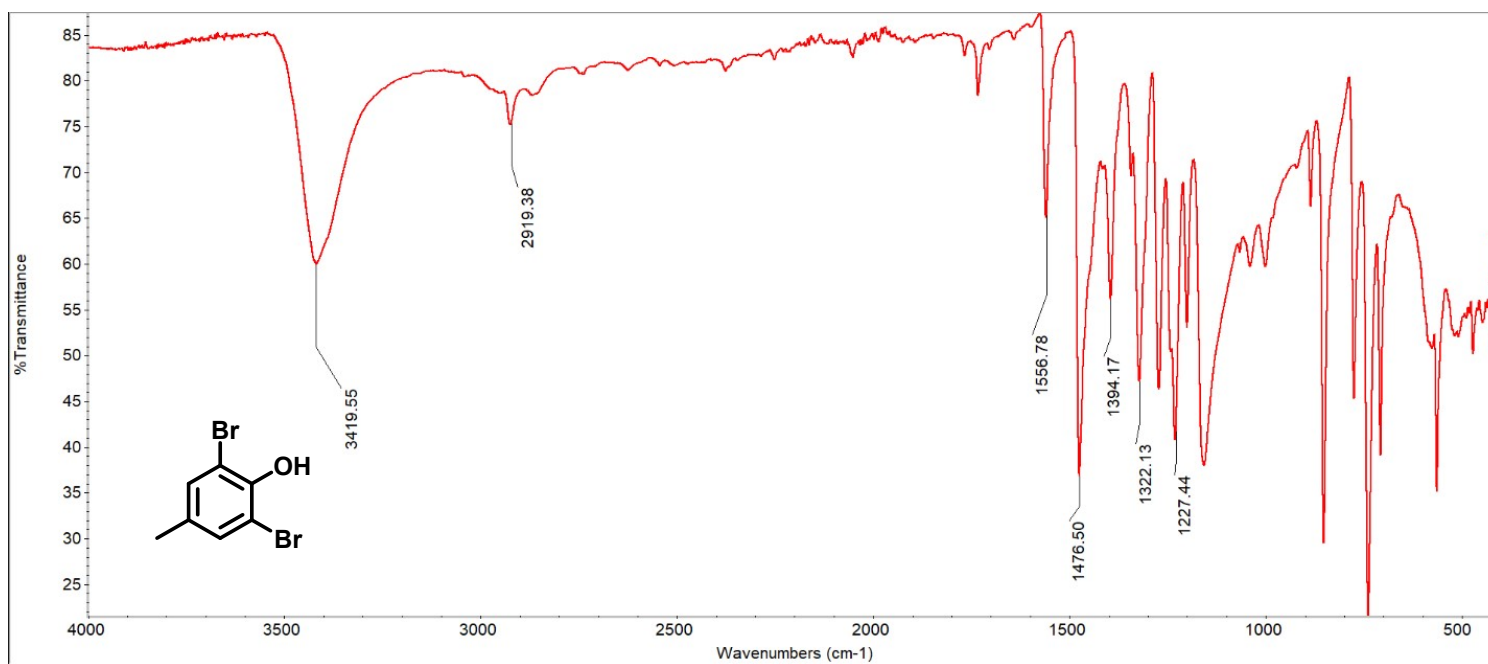

Figure S3. FTIR-spectrum of compound 1

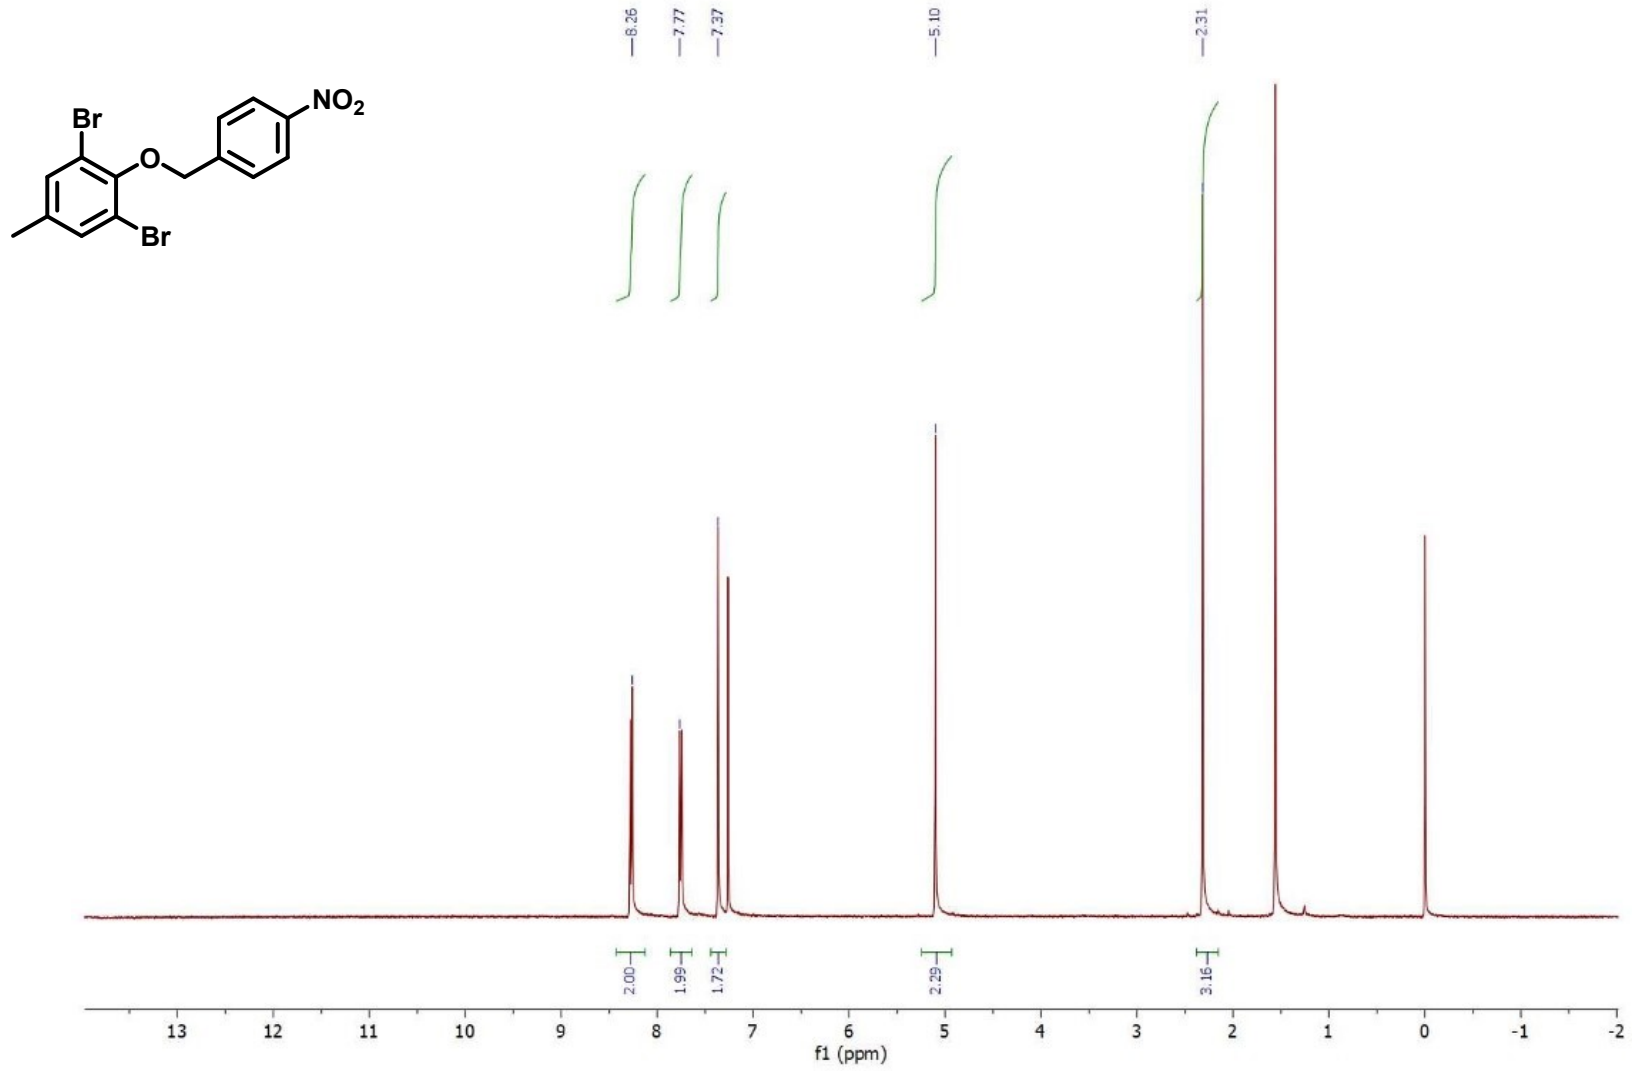

Figure S4. <sup>1</sup>H-NMR spectrum of compound 2

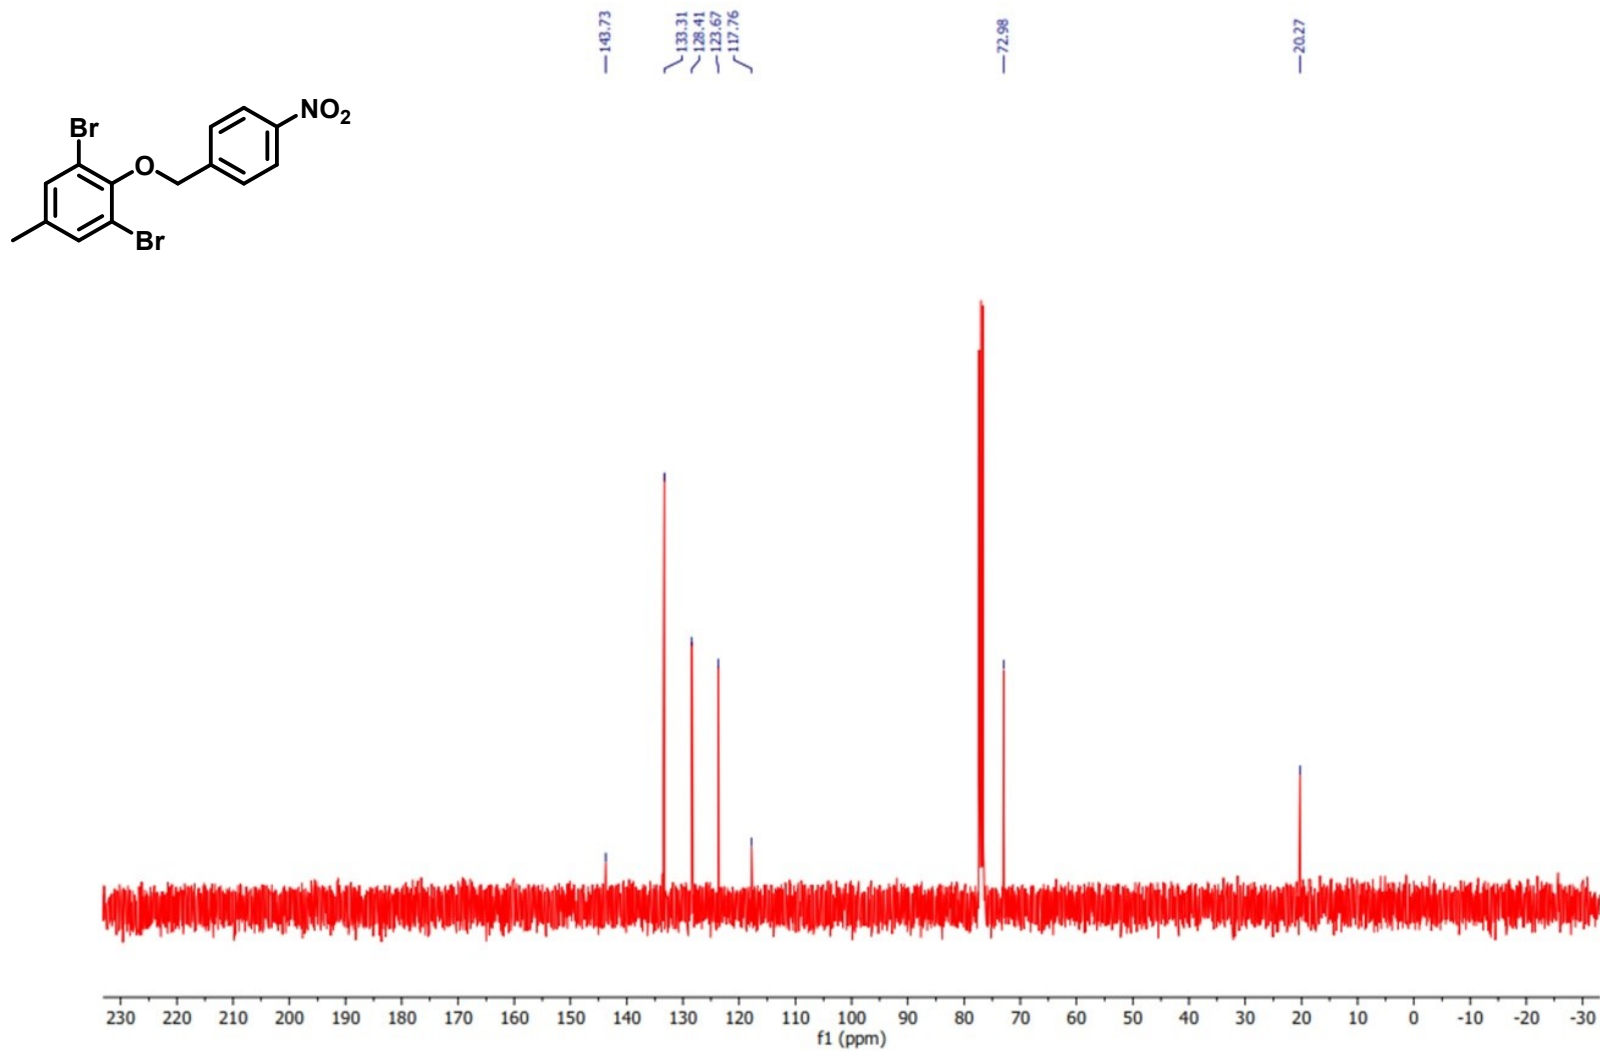

Figure S5. <sup>13</sup>C-NMR spectrum of **compound 2**

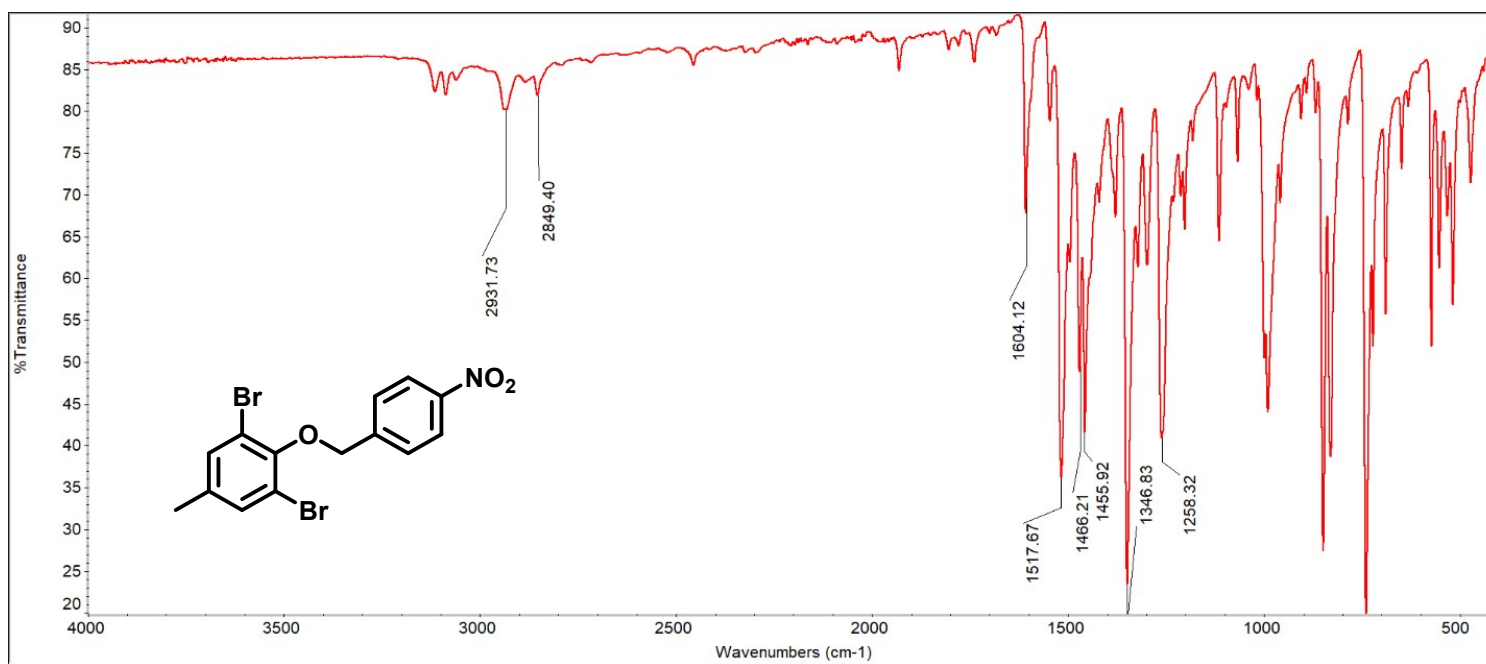

Figure S6. FTIR-spectrum of compound 2

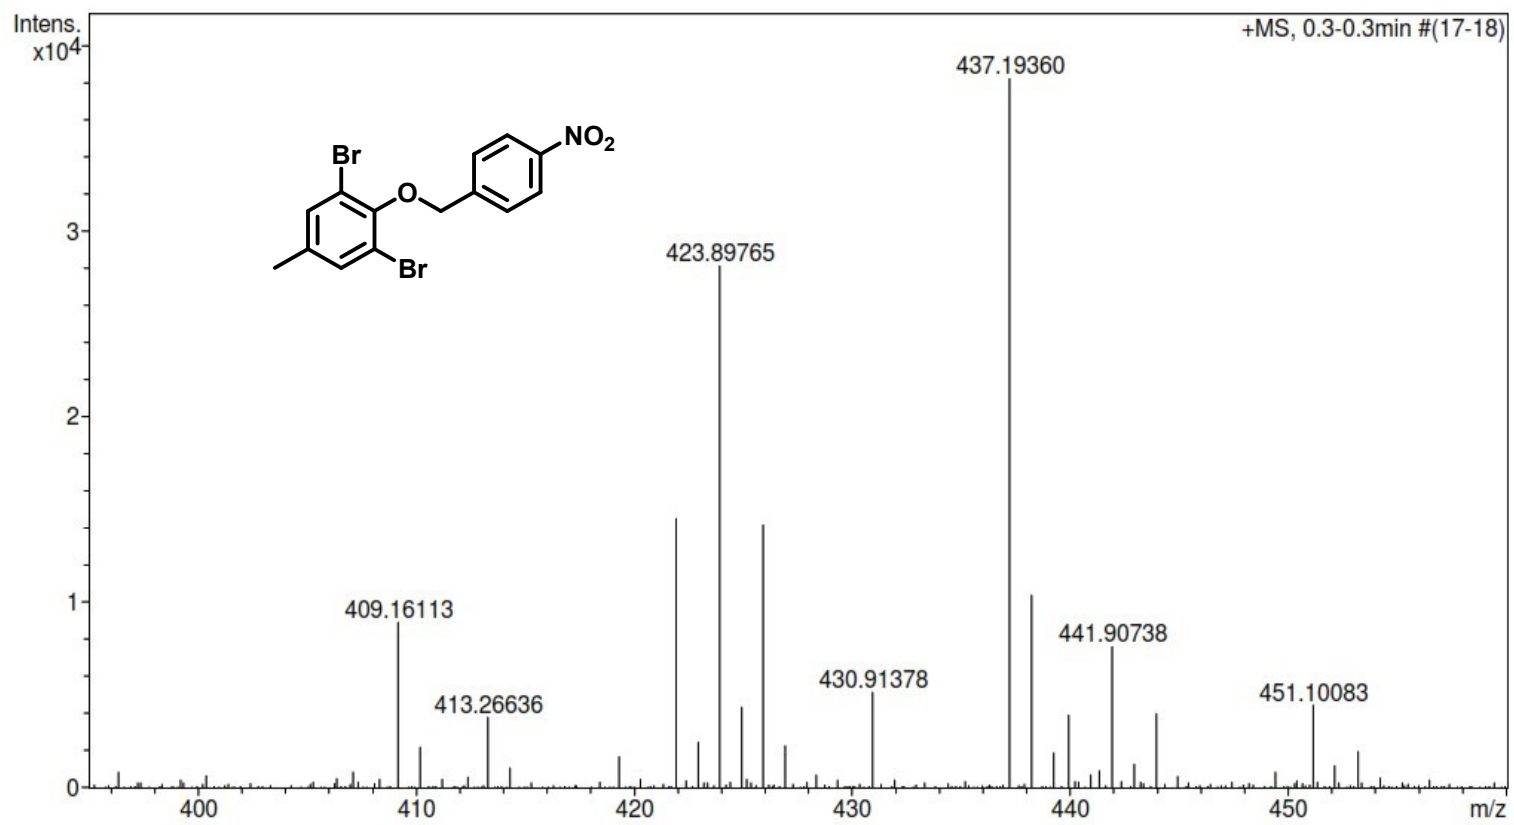

Figure S7 Mass spectrum of compound 2

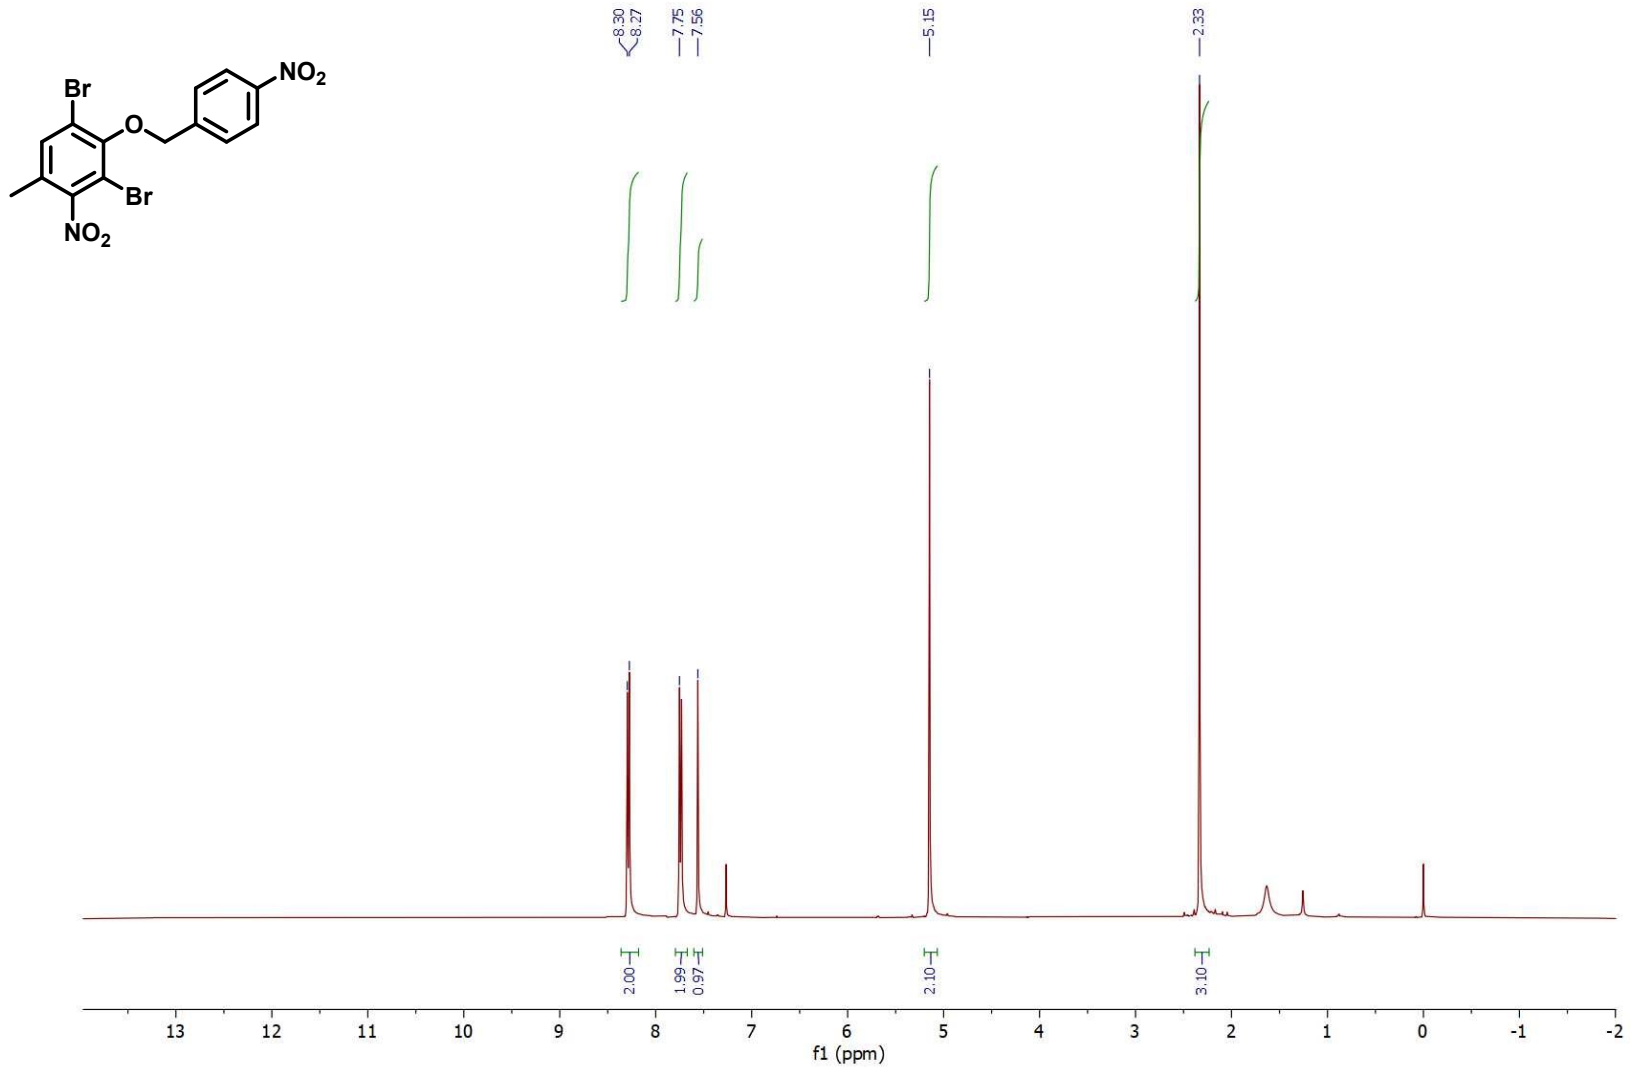

Figure S8 <sup>1</sup>H-NMR spectrum of compound 3

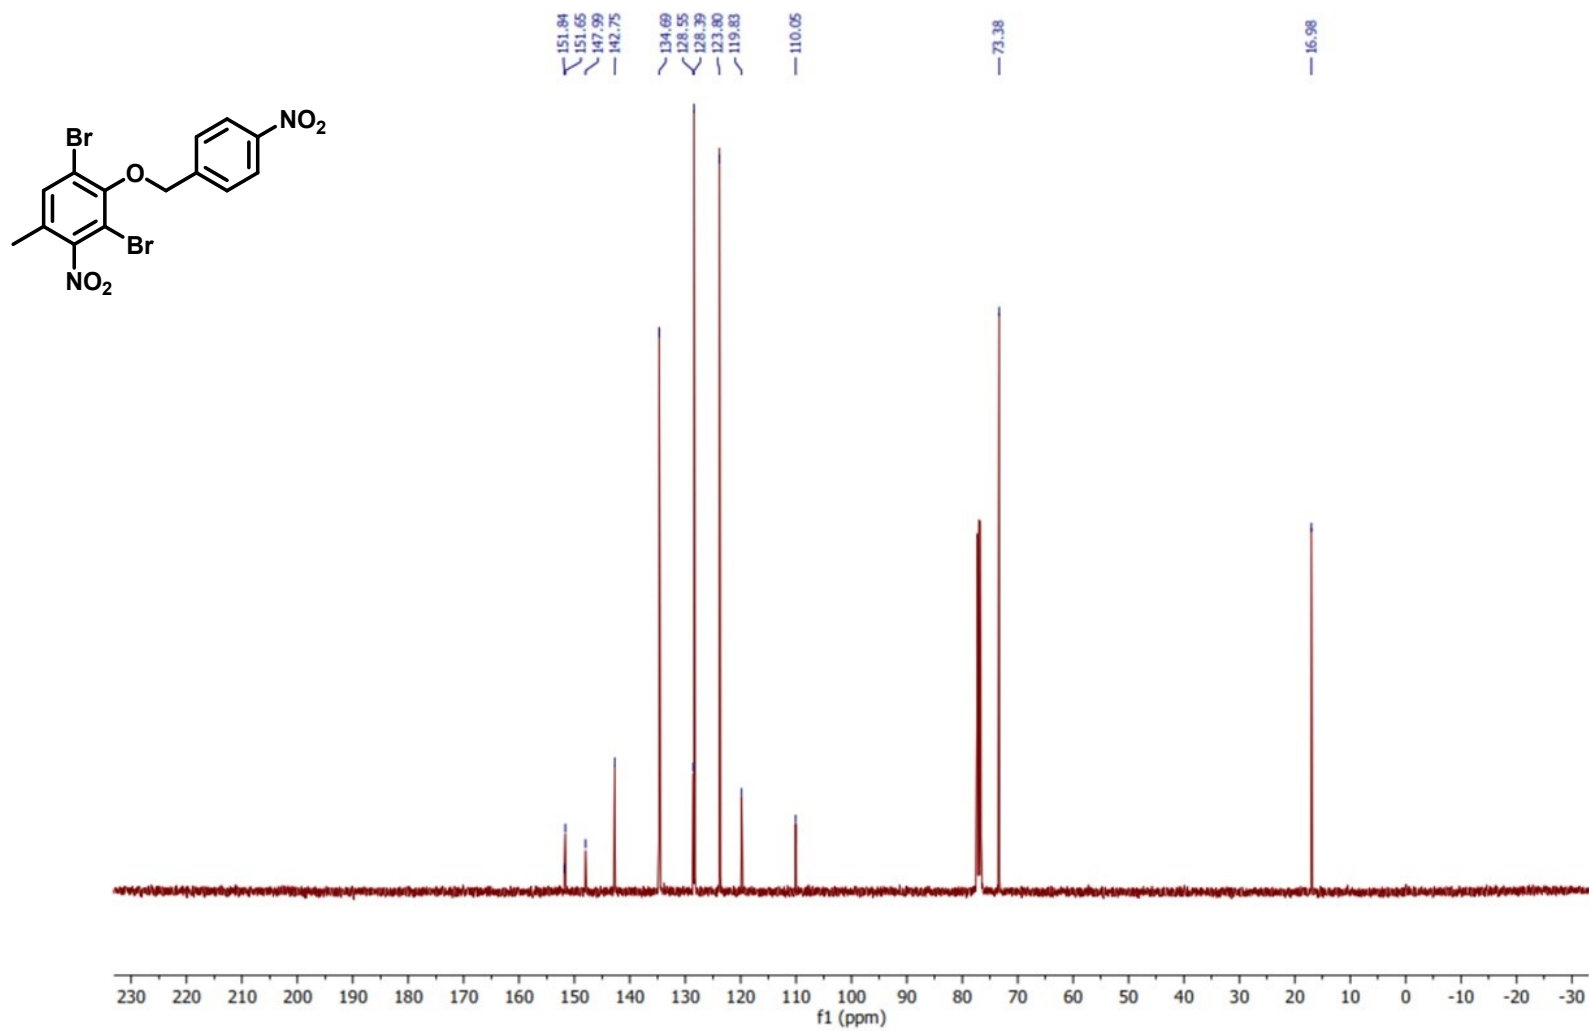

Figure S9 <sup>13</sup>C-NMR spectrum of compound 3

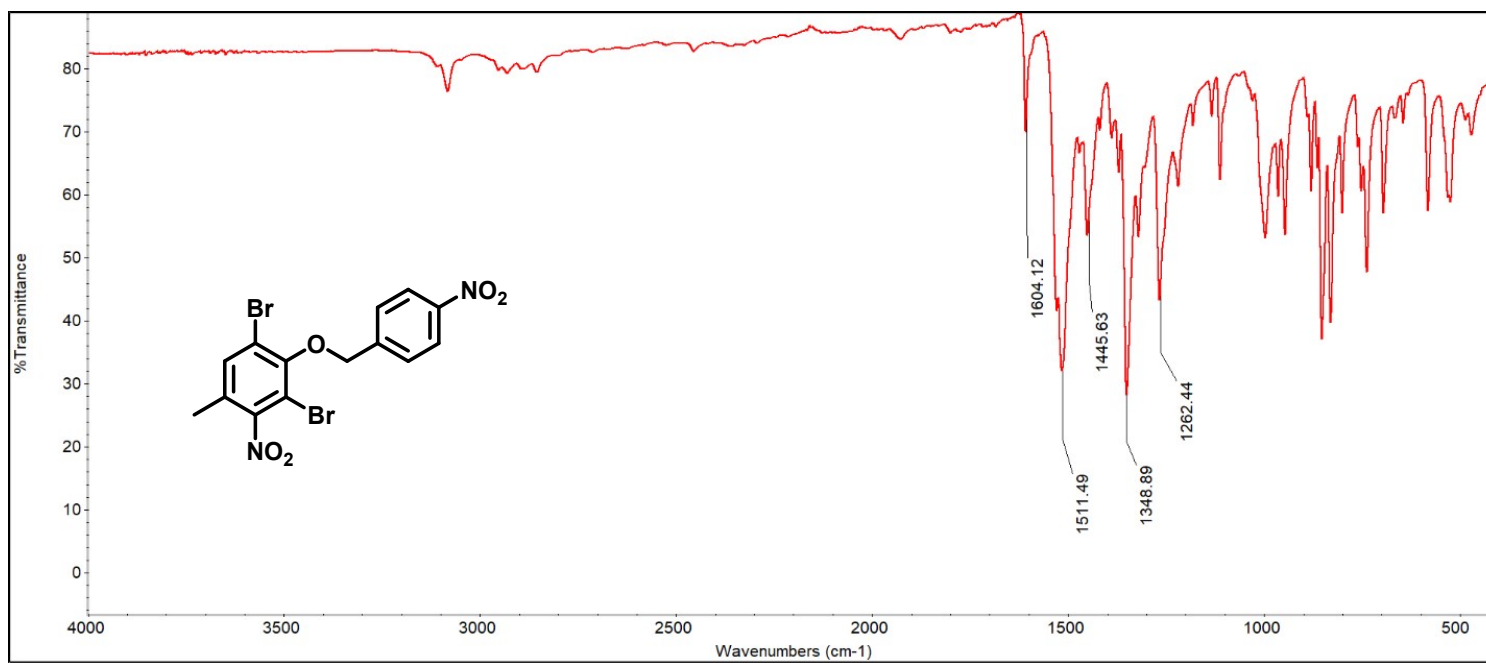

Figure S10 FTIR-spectrum of **compound 3**

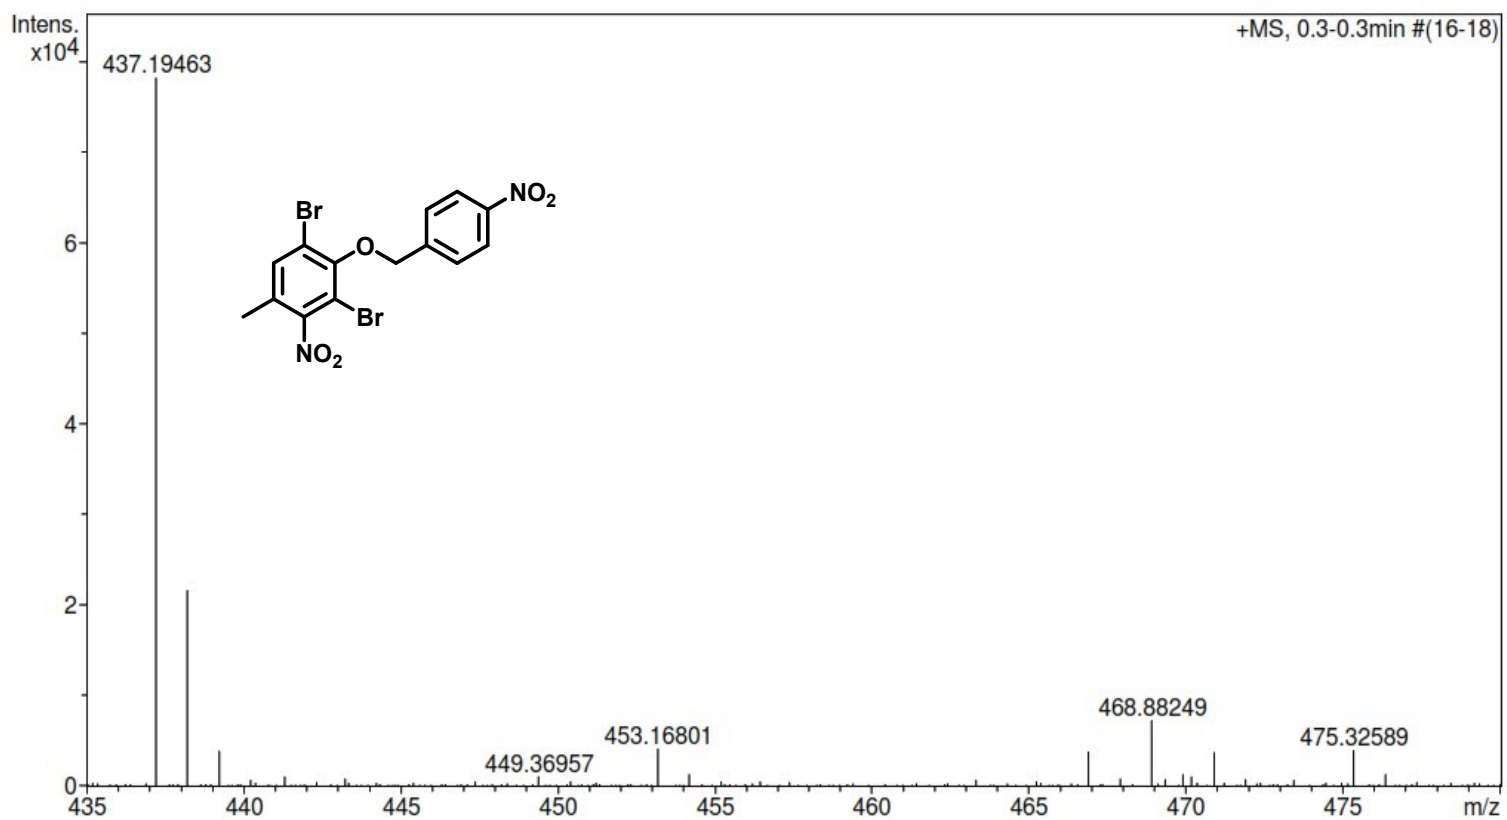

**Figure S11** Mass spectrum of **compound 3**

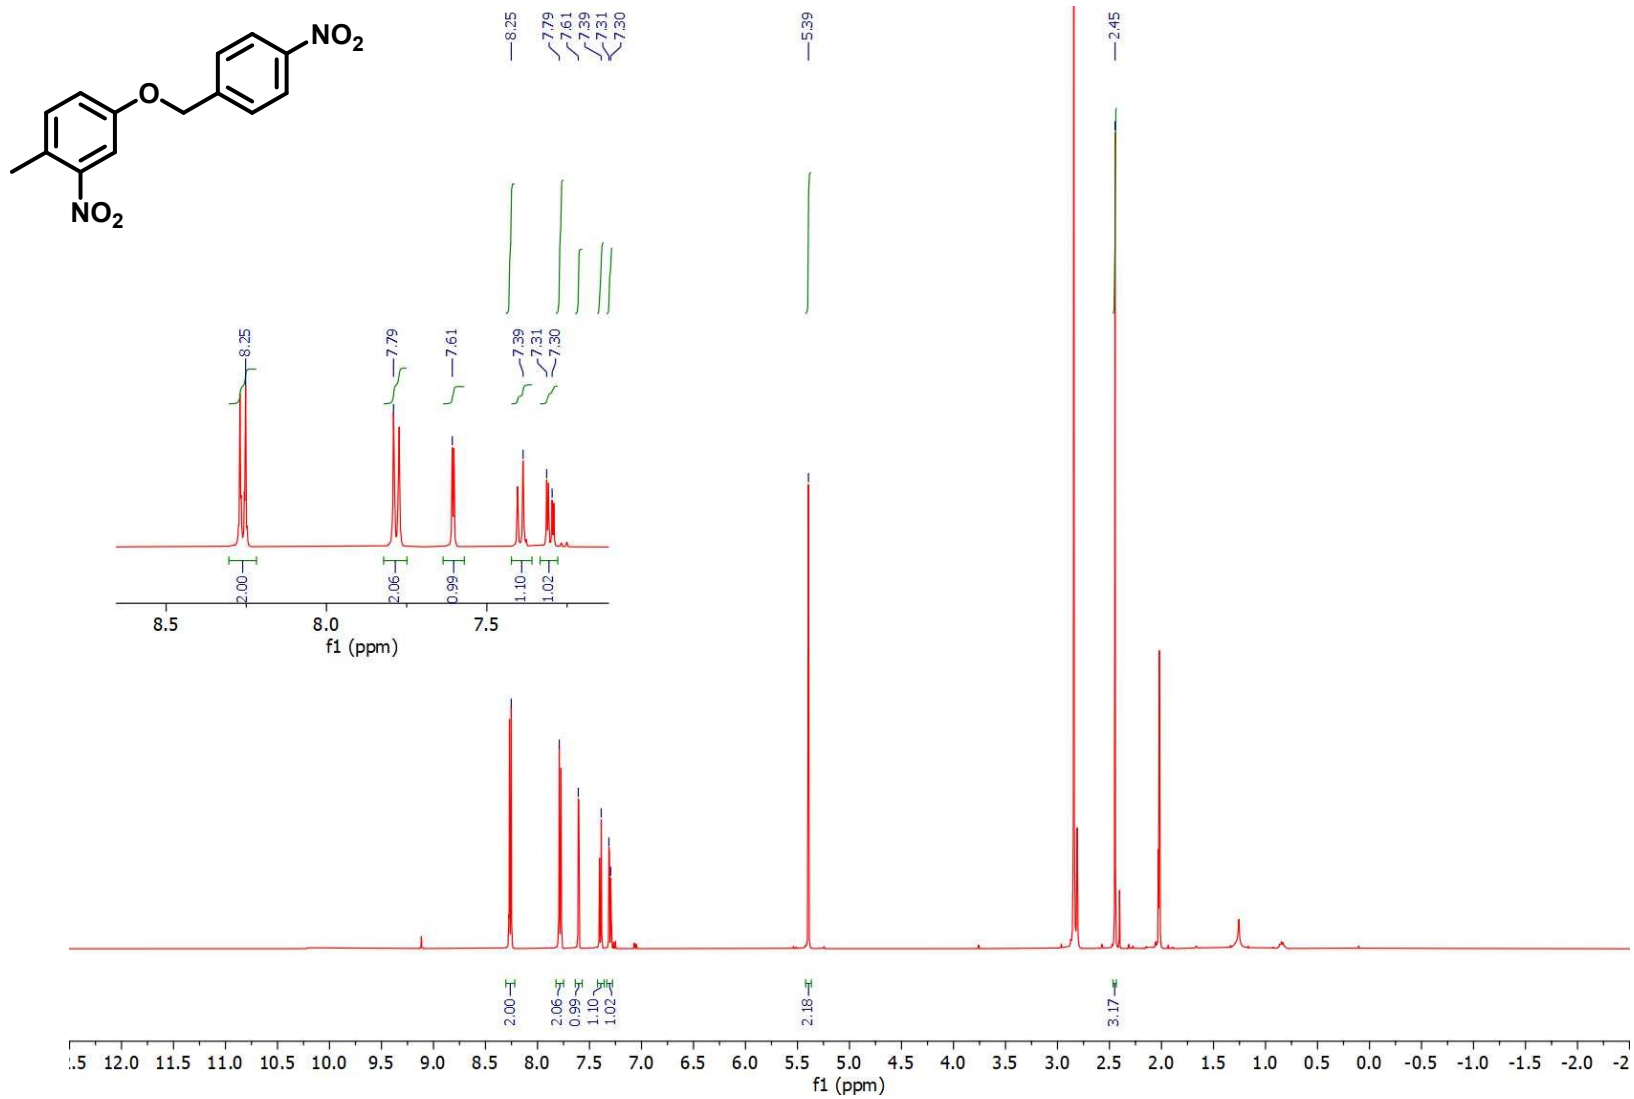

Figure S12 <sup>1</sup>H-NMR spectrum of compound 4

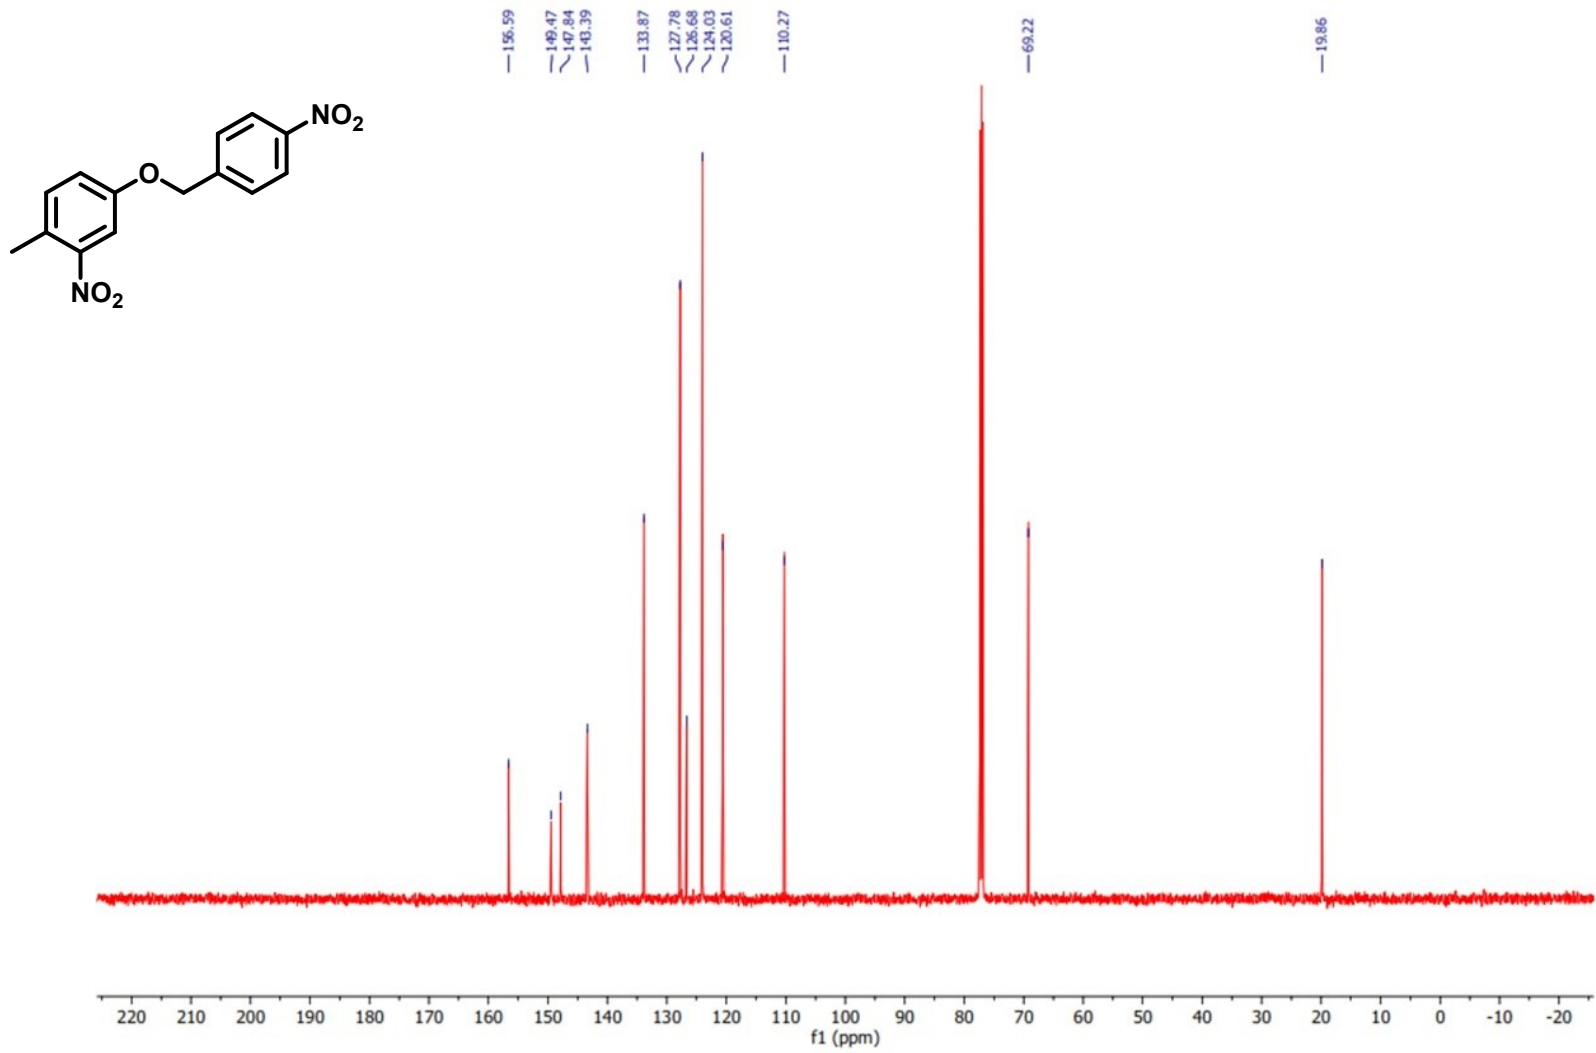

Figure S13 <sup>13</sup>C-NMR spectrum of compound 4

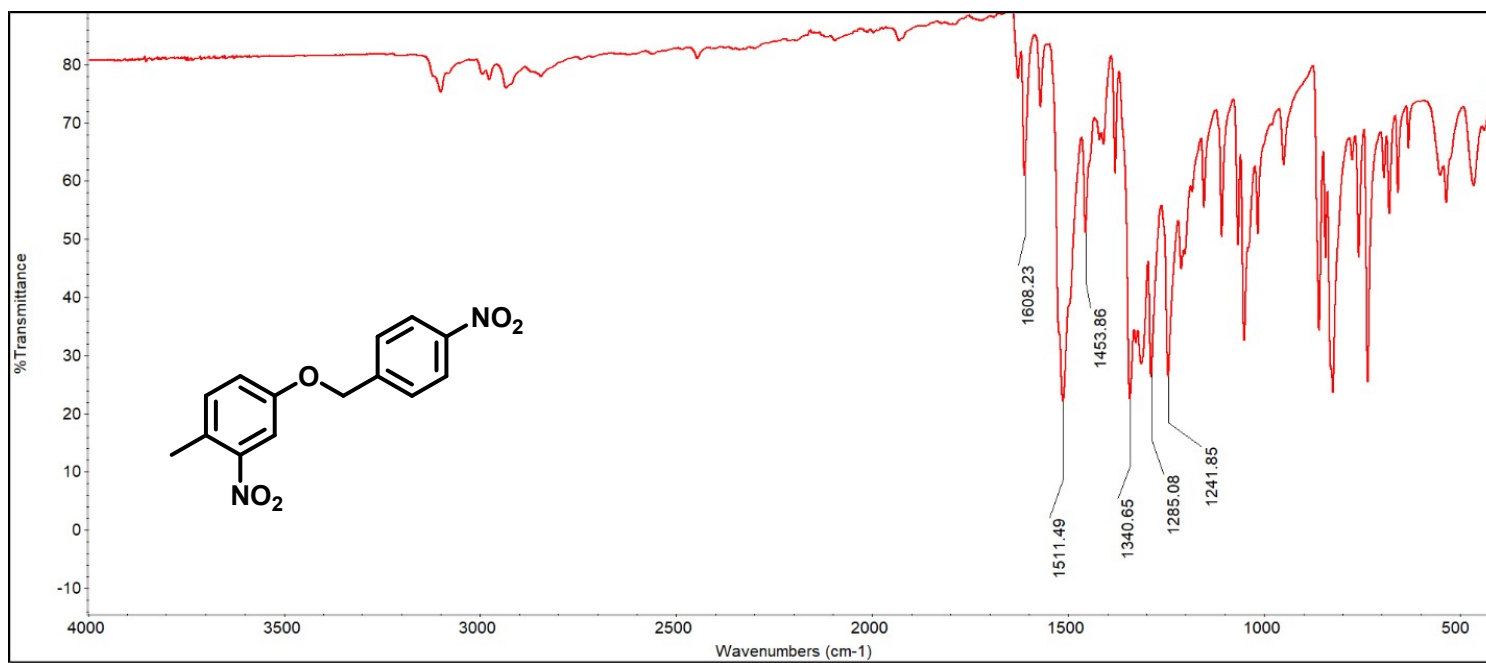

Figure S14 FTIR-spectrum of **compound 4**

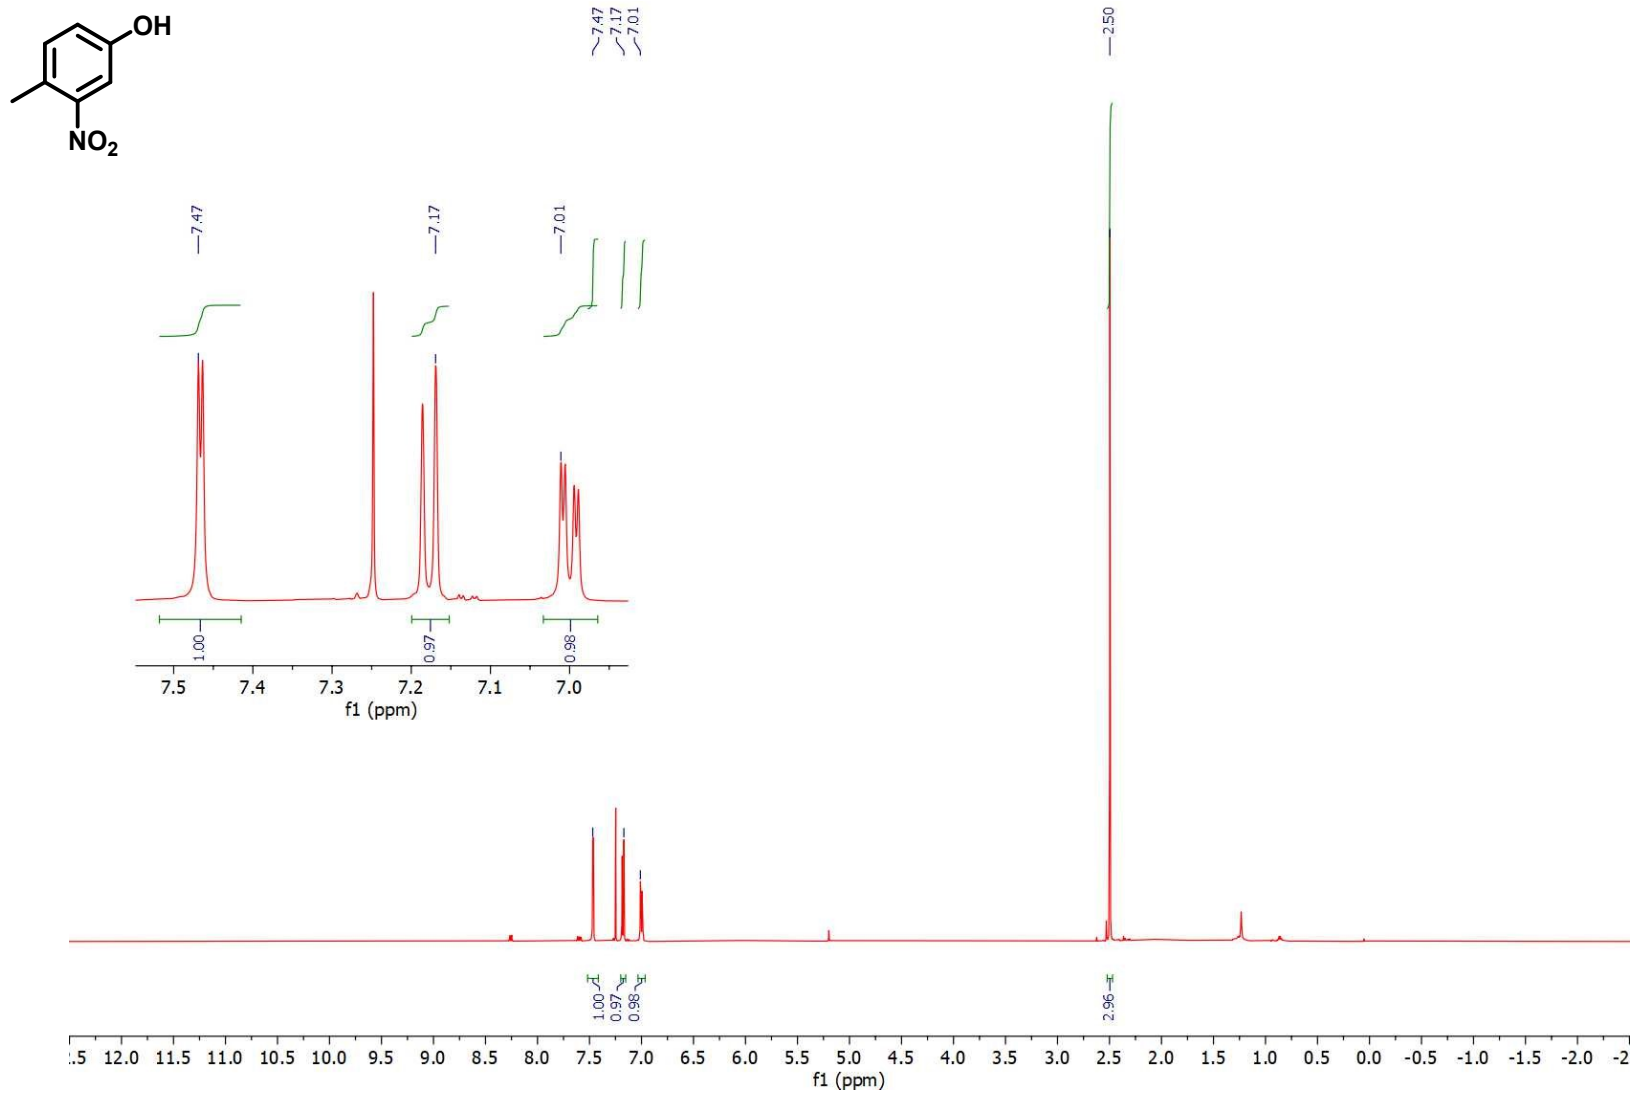

Figure S15 <sup>1</sup>H NMR (CDCl<sub>3</sub>) spectrum of compound 5

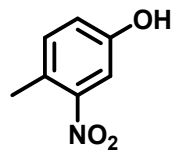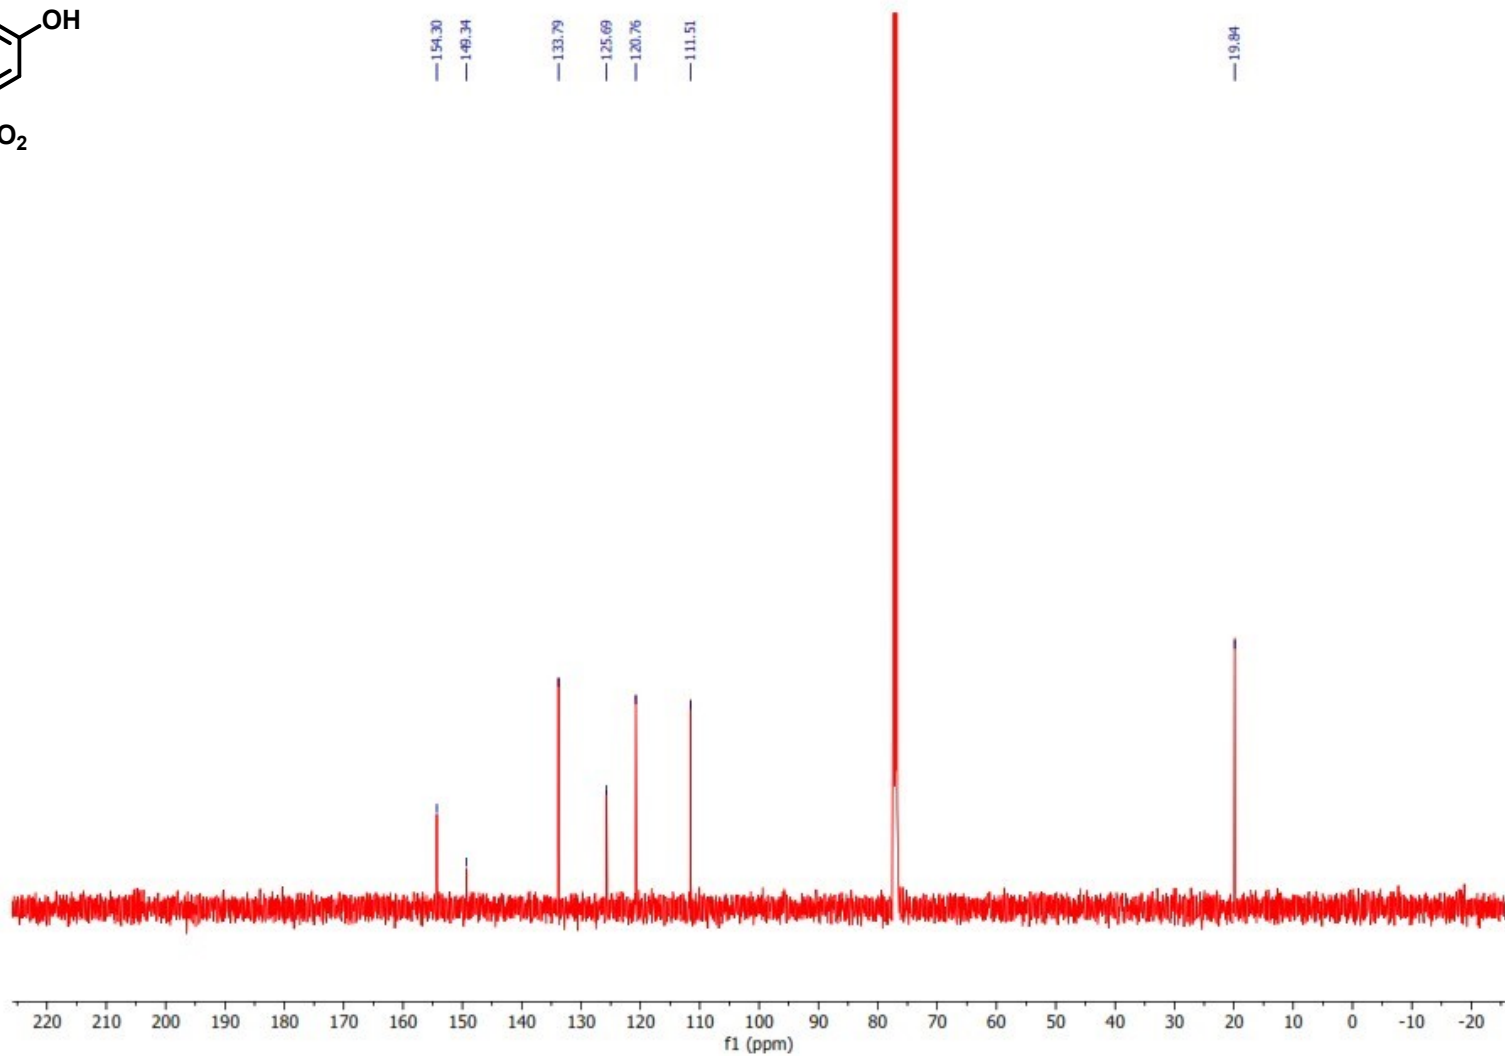

Figure S16 <sup>13</sup>C NMR (CDCl<sub>3</sub>) spectrum of compound 5

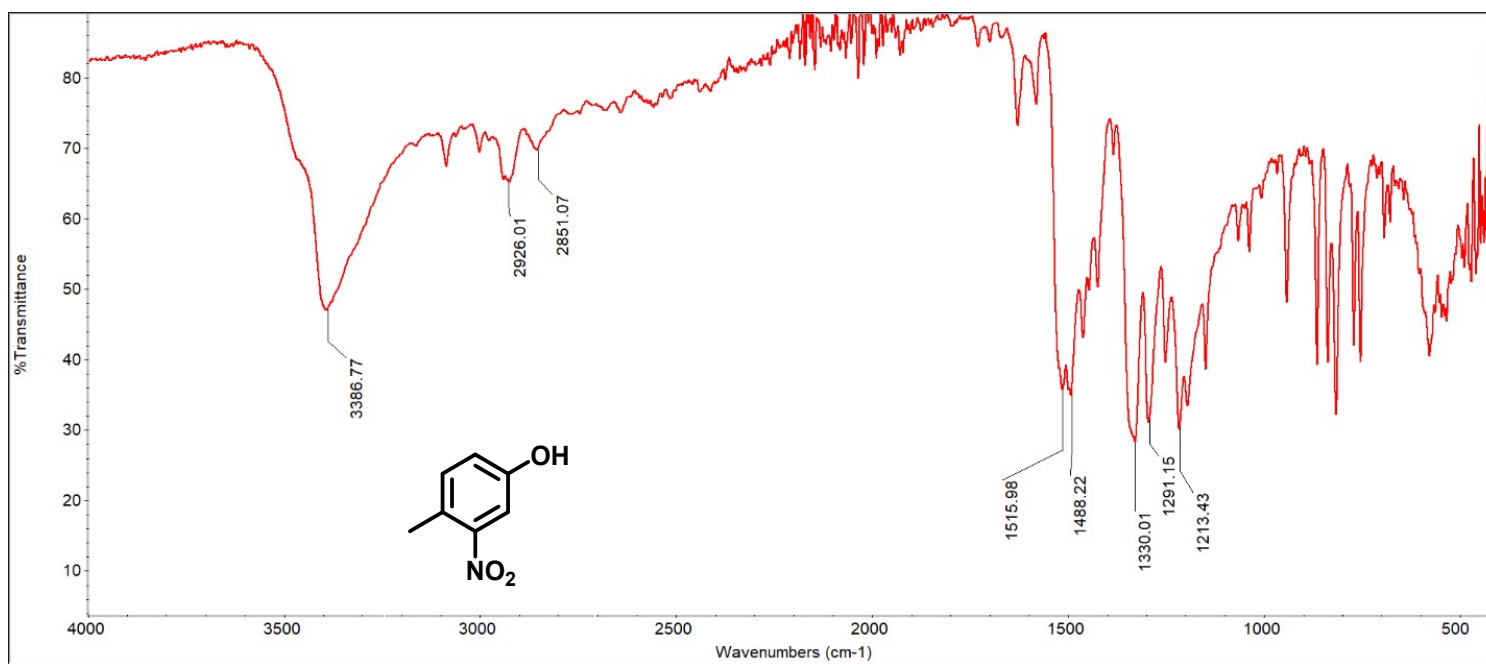

Figure S17 IR spectrum of compound 5

# Functionalization on estradiol

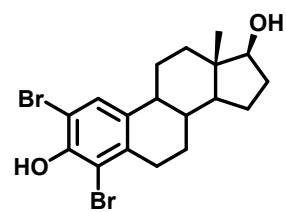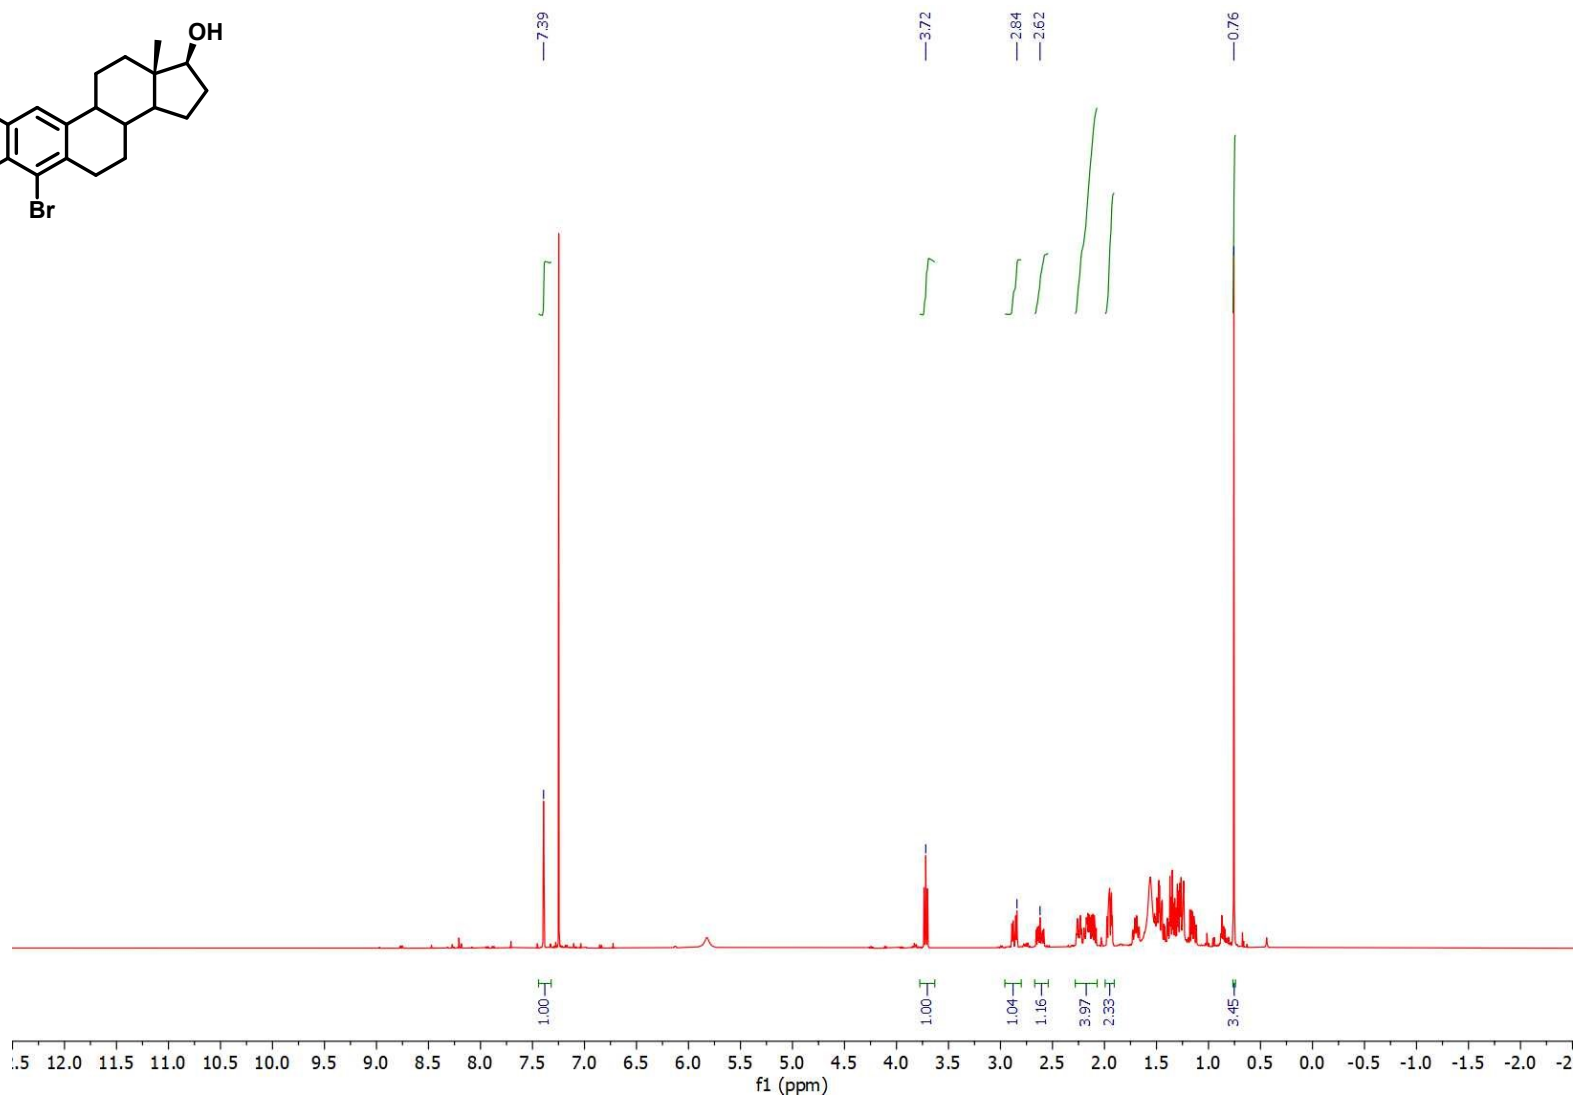

Figure S18 <sup>1</sup>H-NMR spectrum of 2,4-dibromo-estradiol

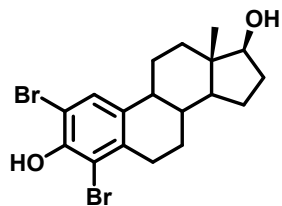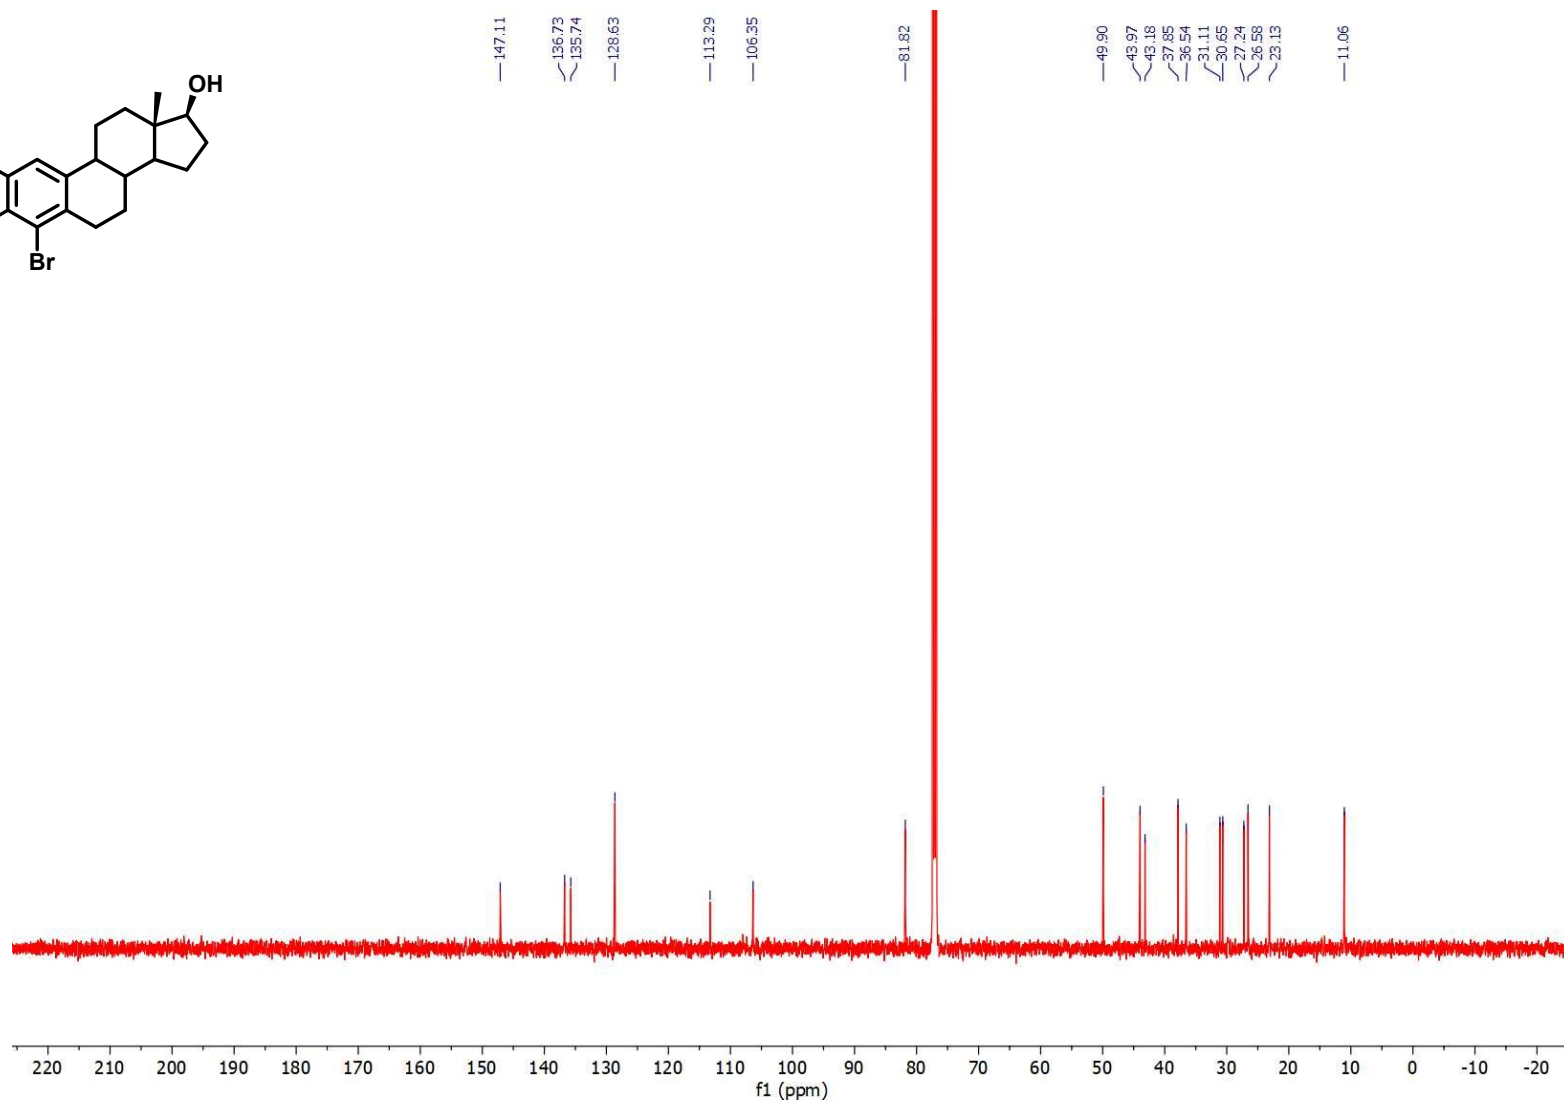

Figure S19 <sup>13</sup>C-NMR spectrum of 2,4-dibromo-estradiol

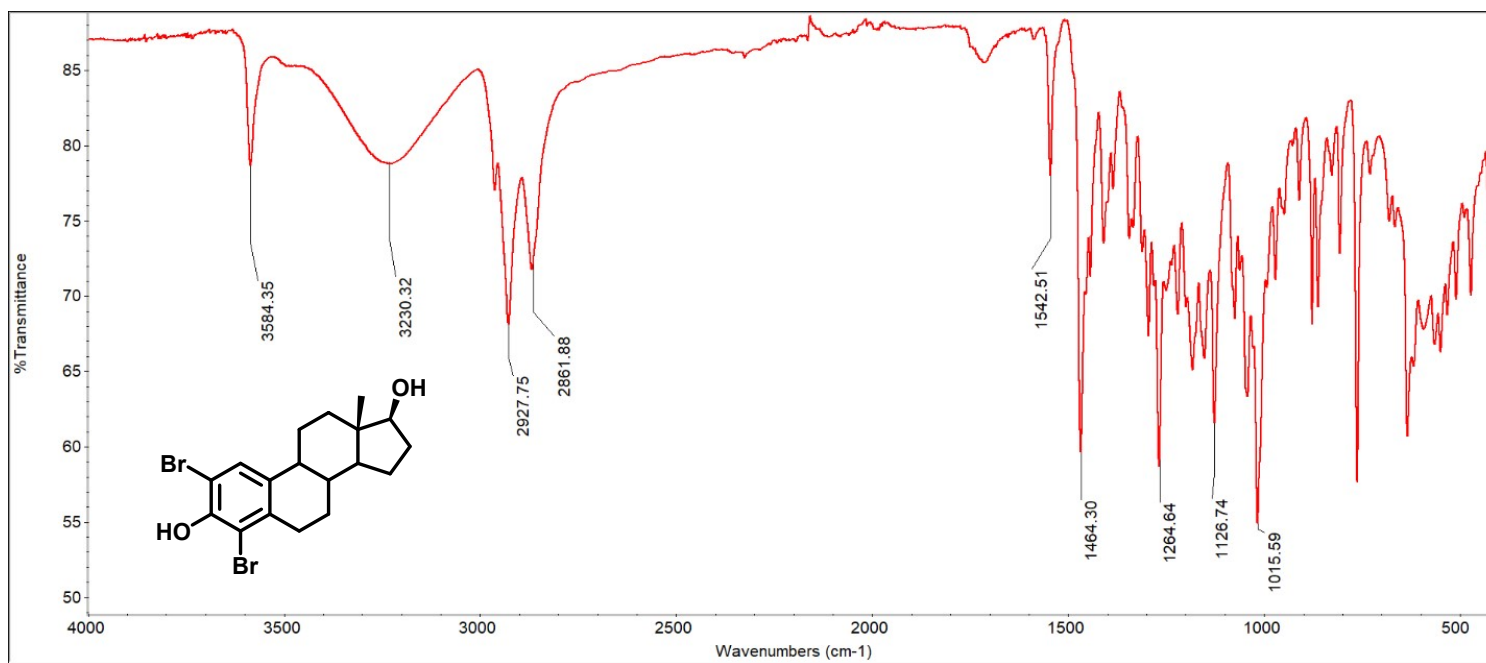

Figure S20 FTIR-spectrum of 2,4-dibromo-estradiol

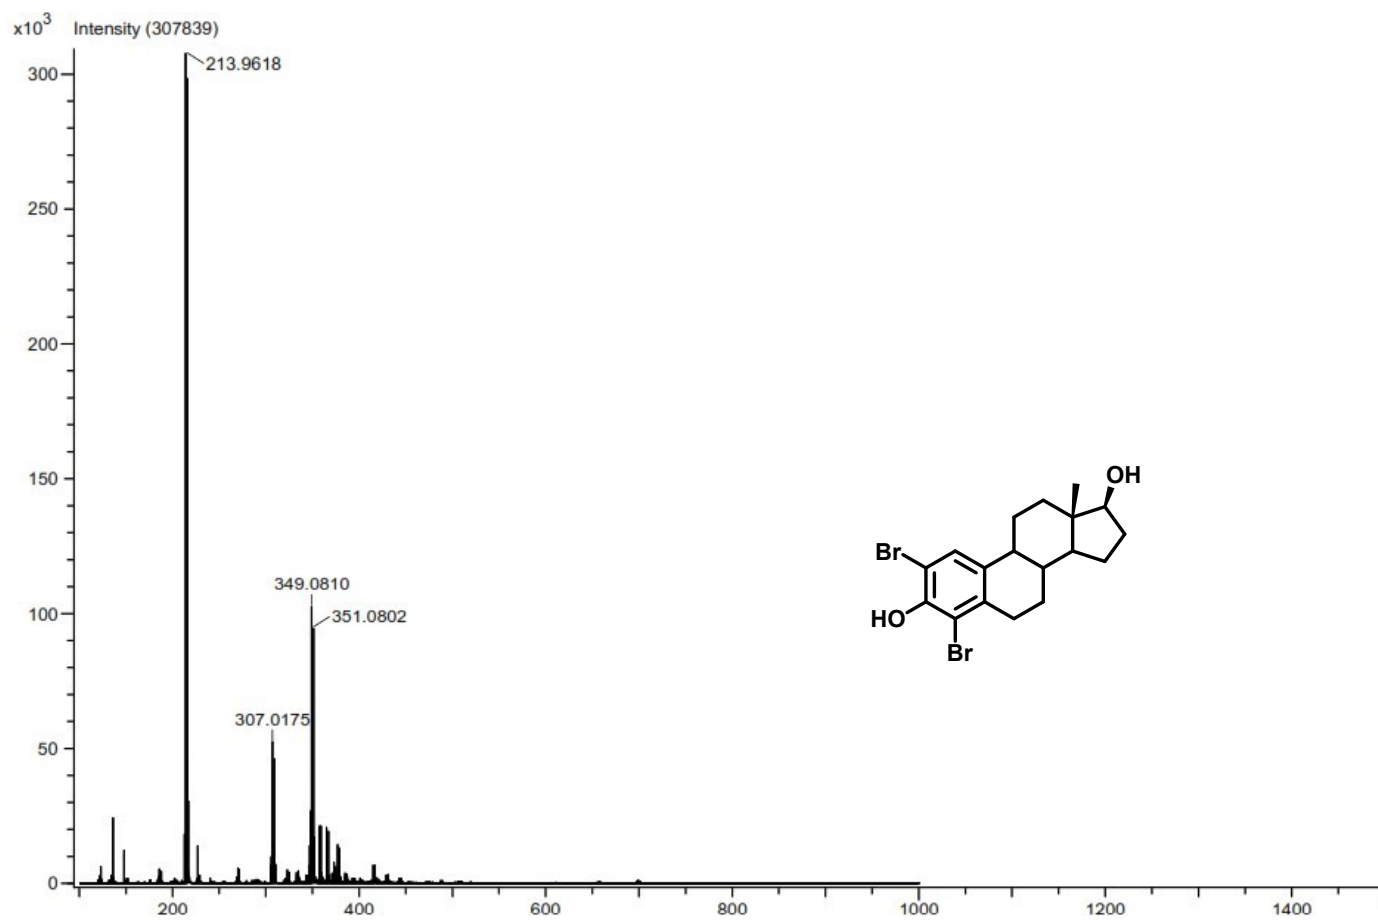

Figure S21 Mass spectrum of 2,4-dibromo-estradiol

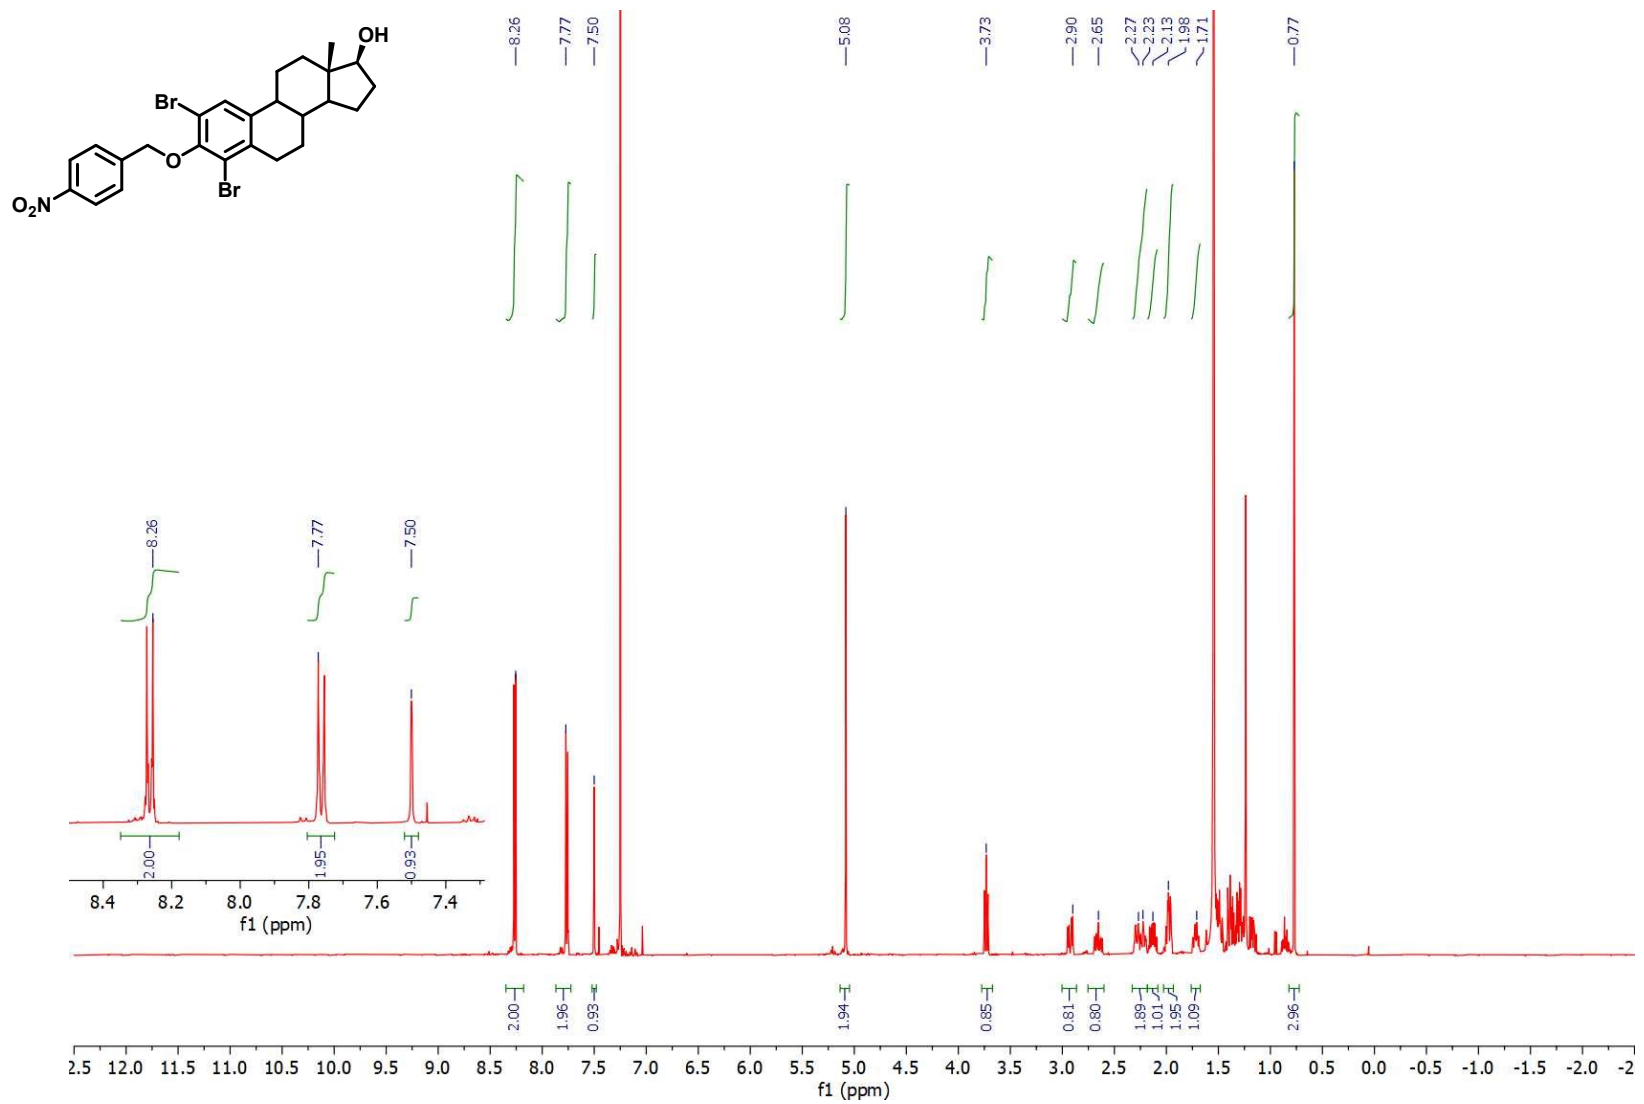

Figure S22 <sup>1</sup>H-NMR spectrum of compound 6

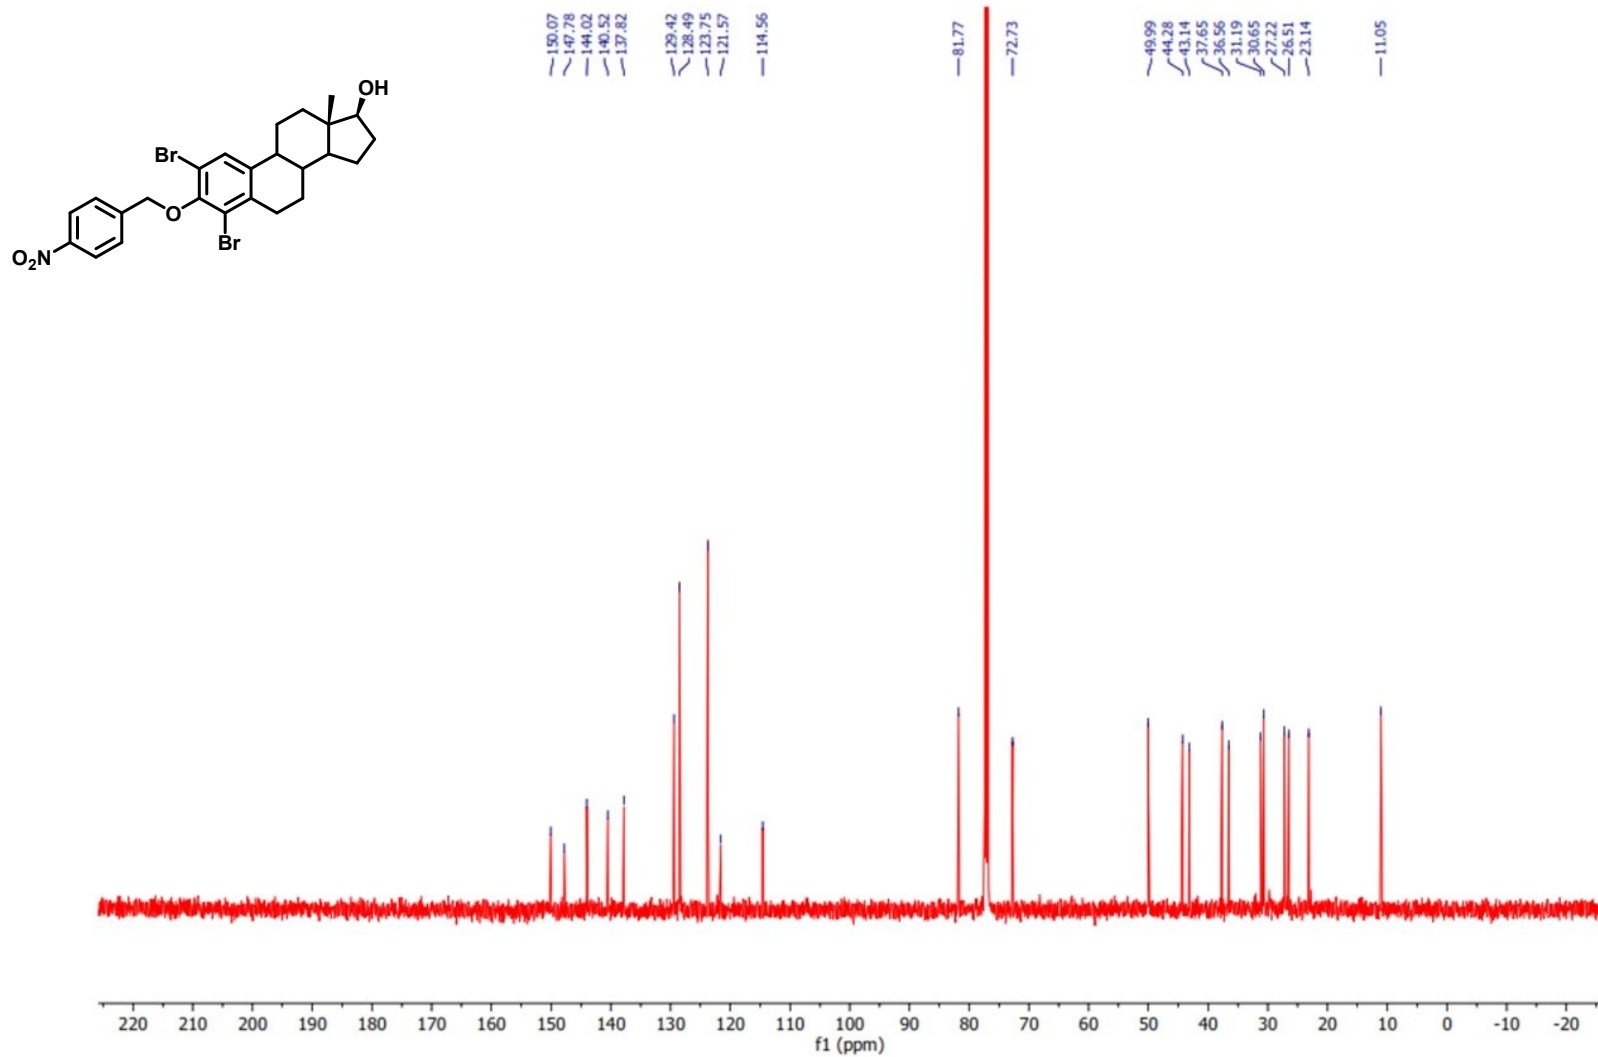

Figure S23 <sup>13</sup>C-NMR spectrum of compound 6

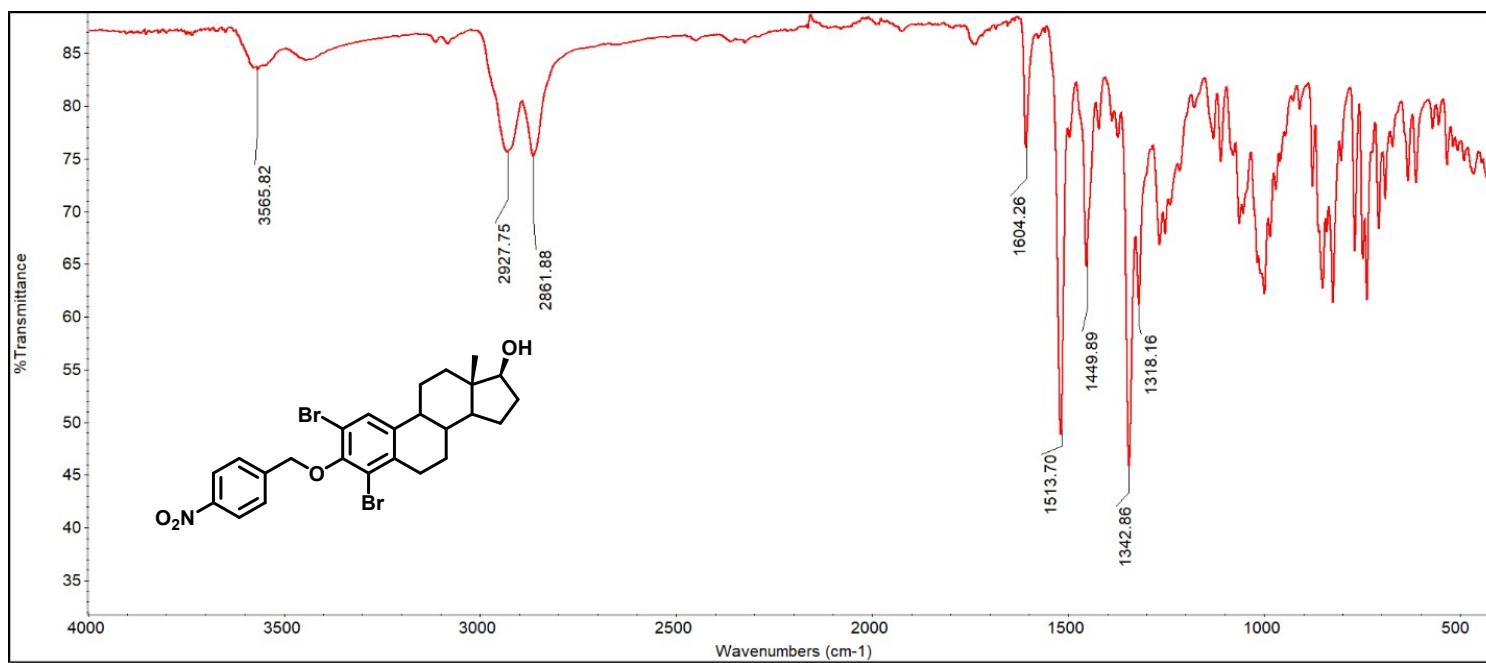

Figure S24 FTIR-spectrum of **compound 6**

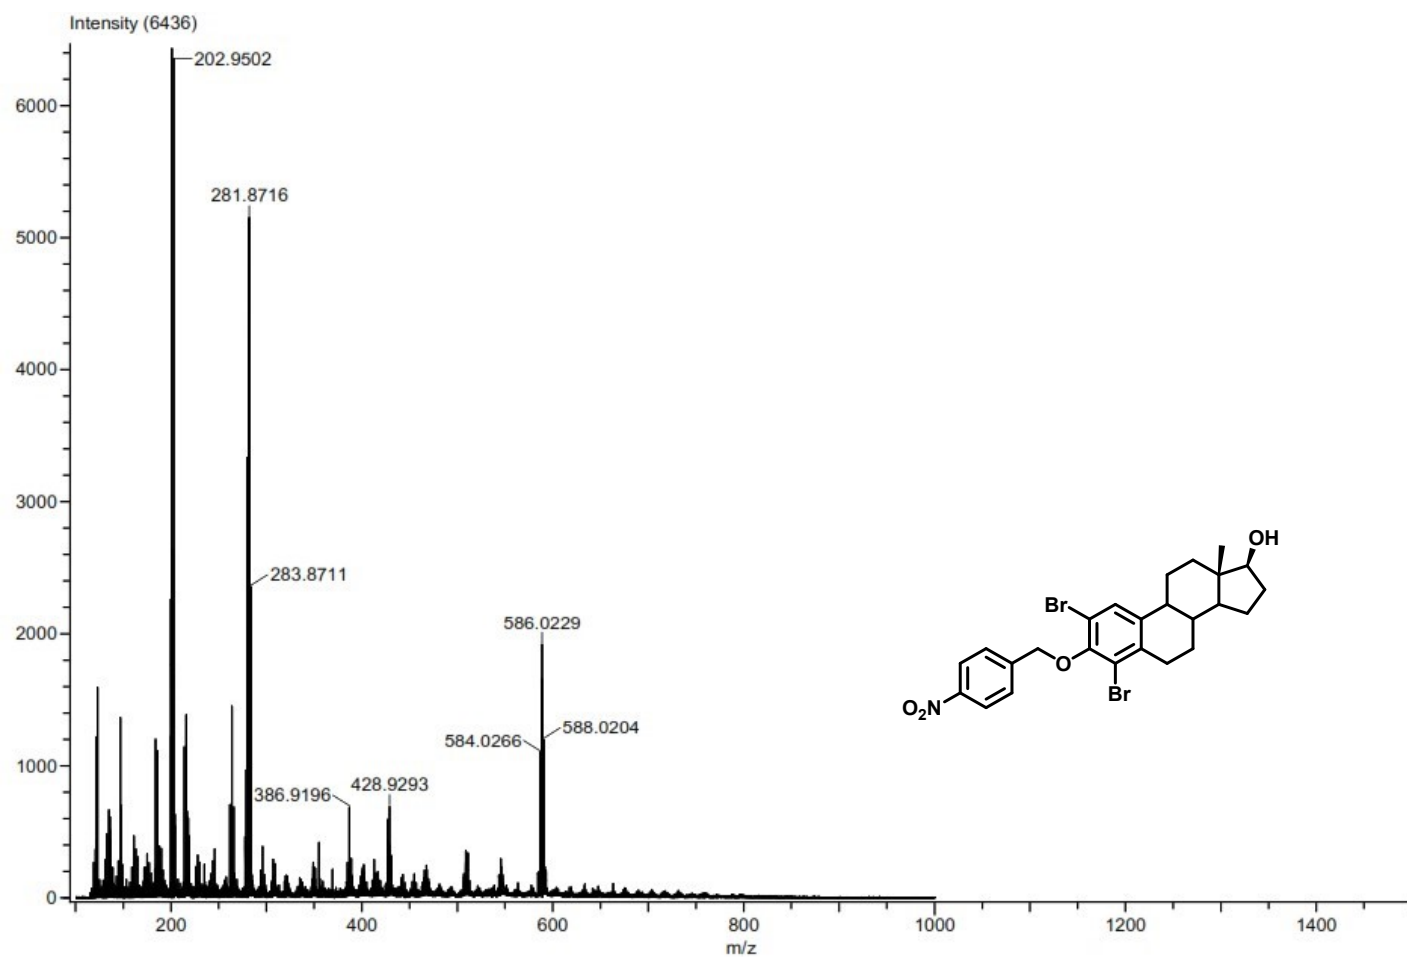

Figure S25 Mass spectrum of compound 6

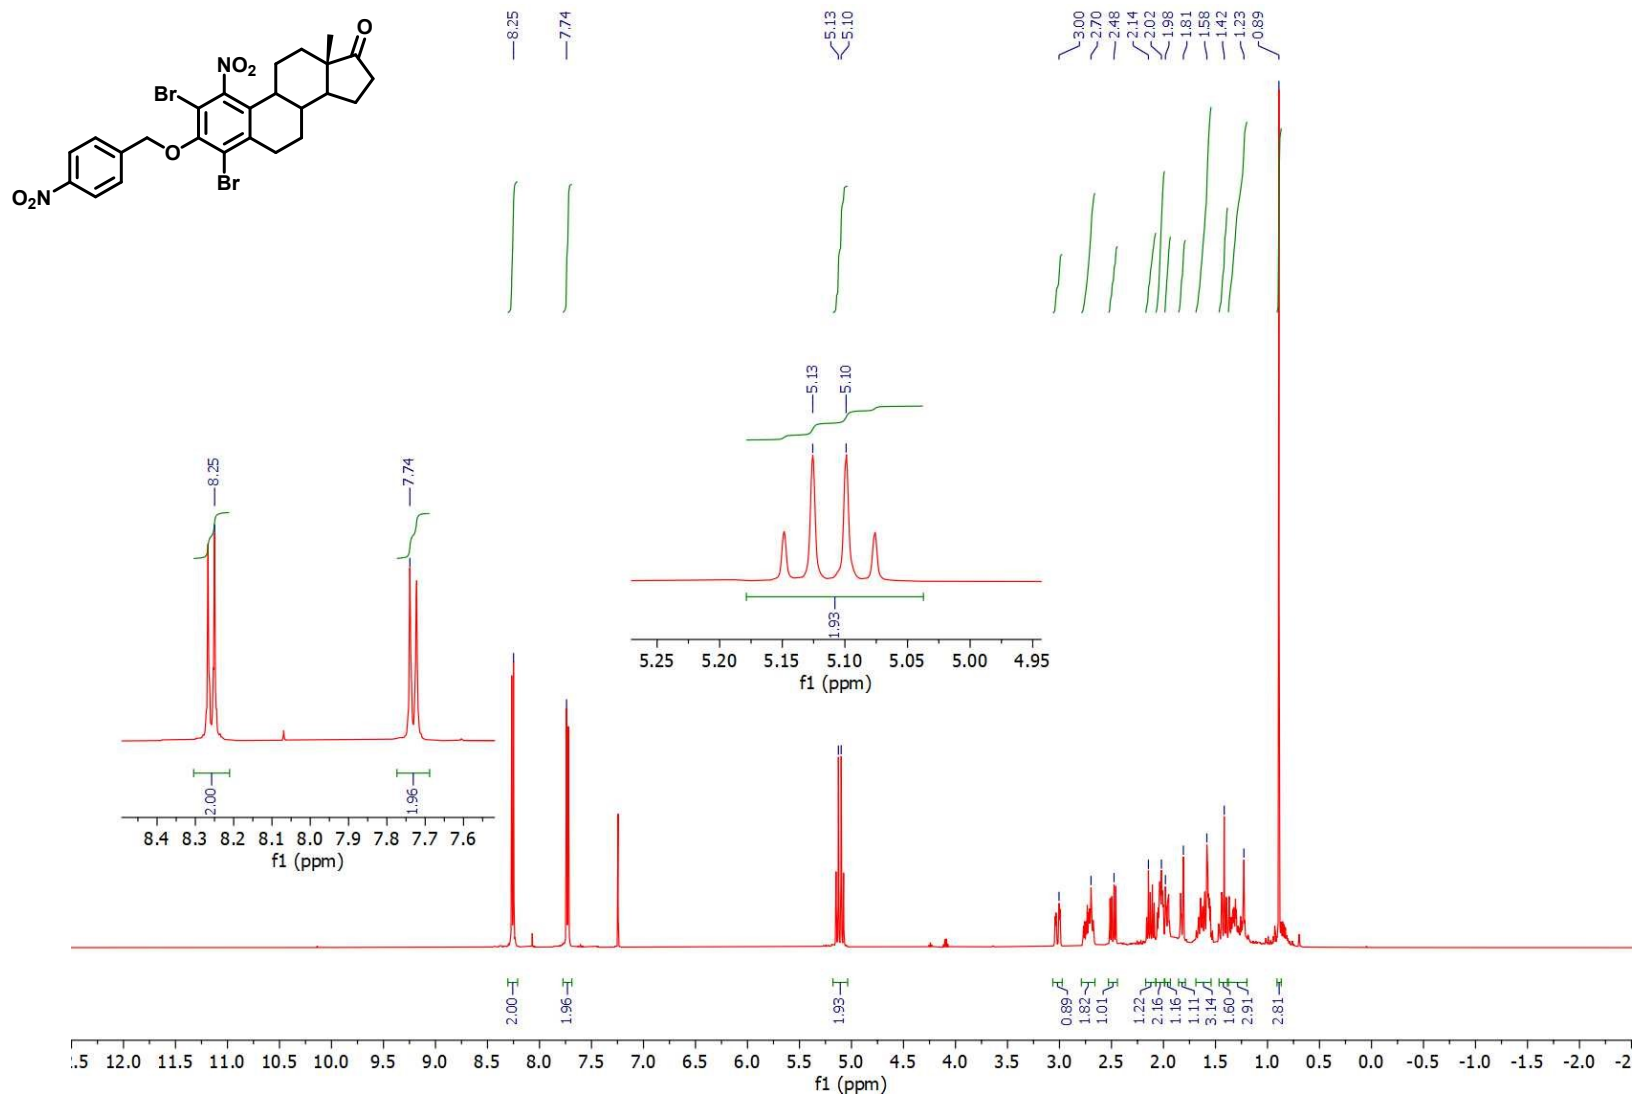

Figure S26 <sup>1</sup>H-NMR spectrum of compound 7

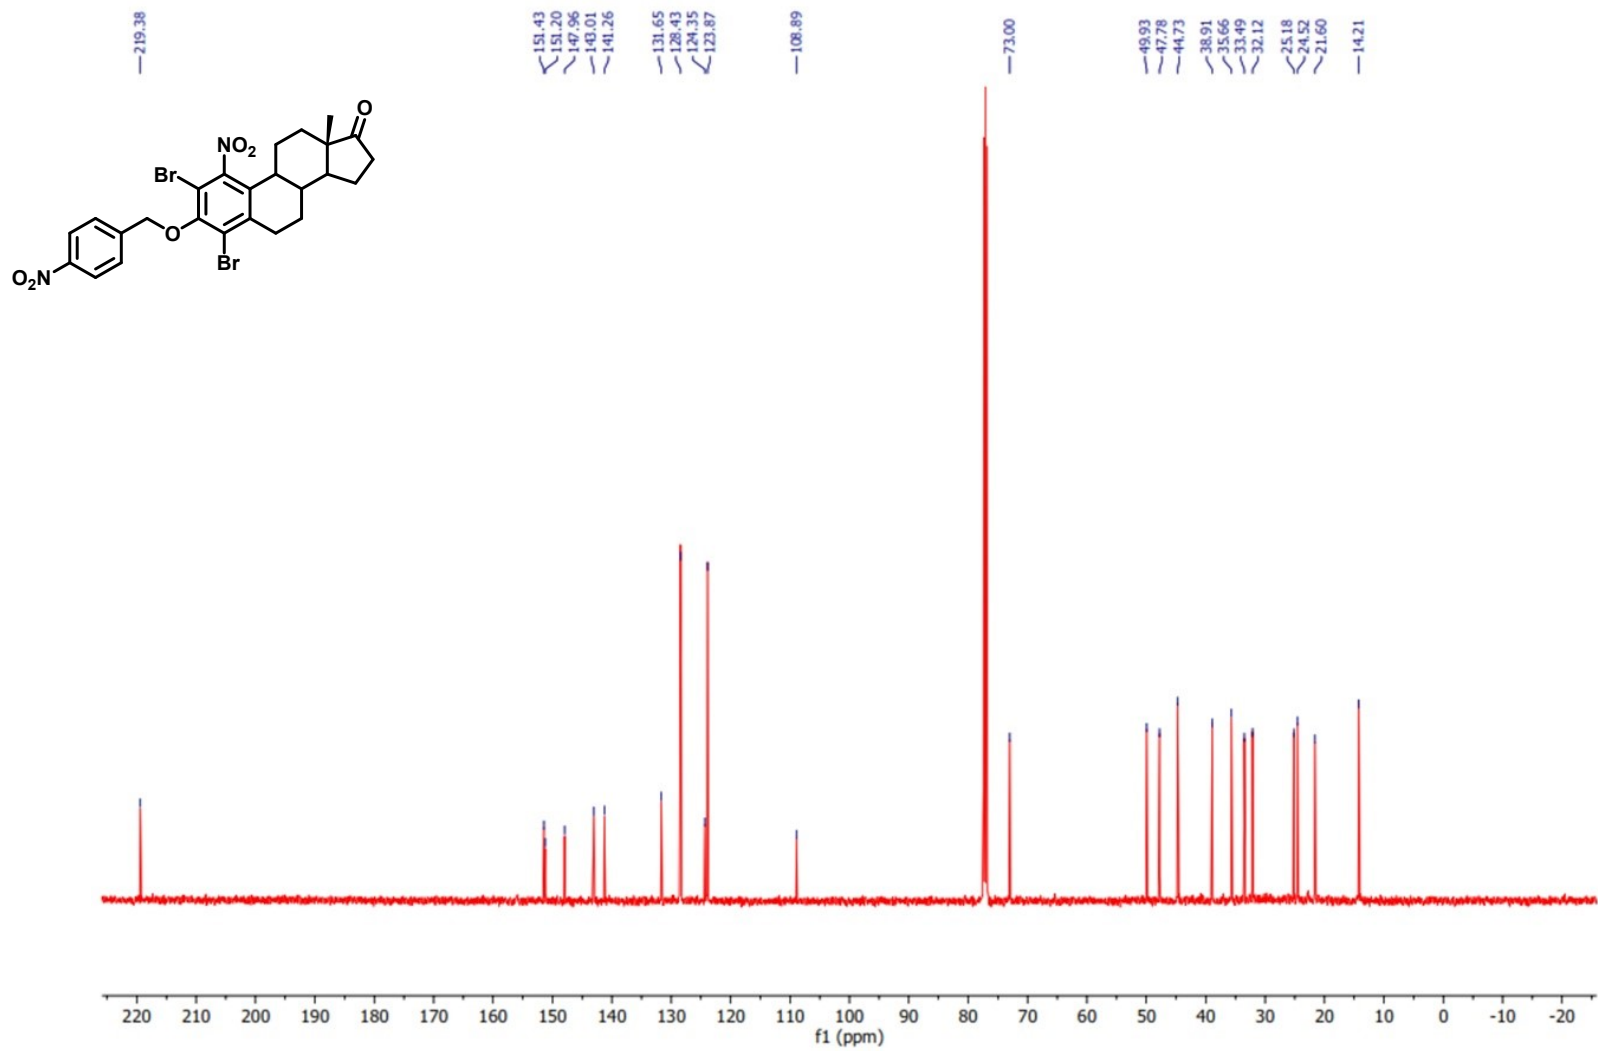

Figure S27 <sup>13</sup>C-NMR spectrum of compound 7

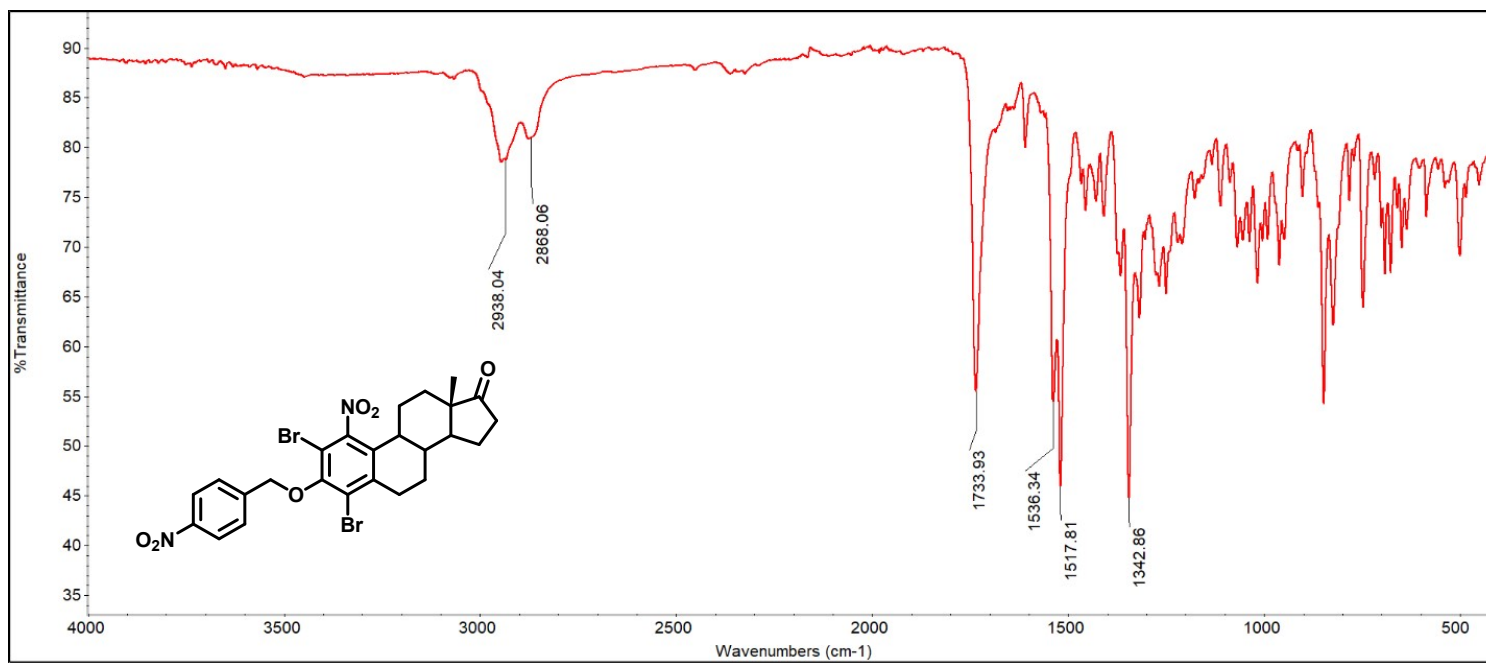

Figure S28 FTIR-spectrum of compound 7

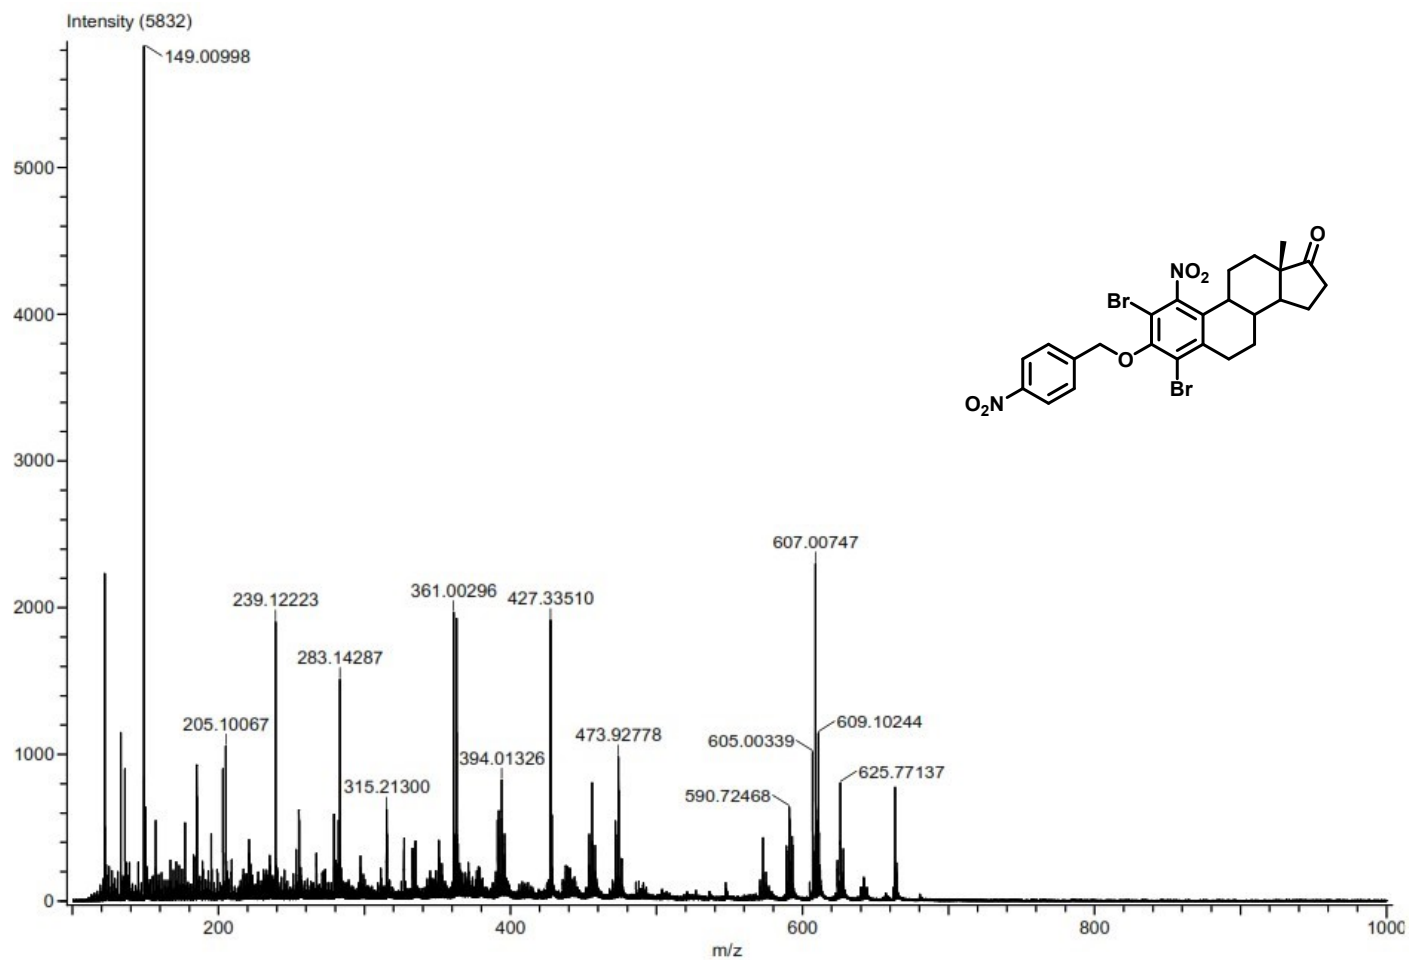

Figure S29 Mass spectrum of compound 7

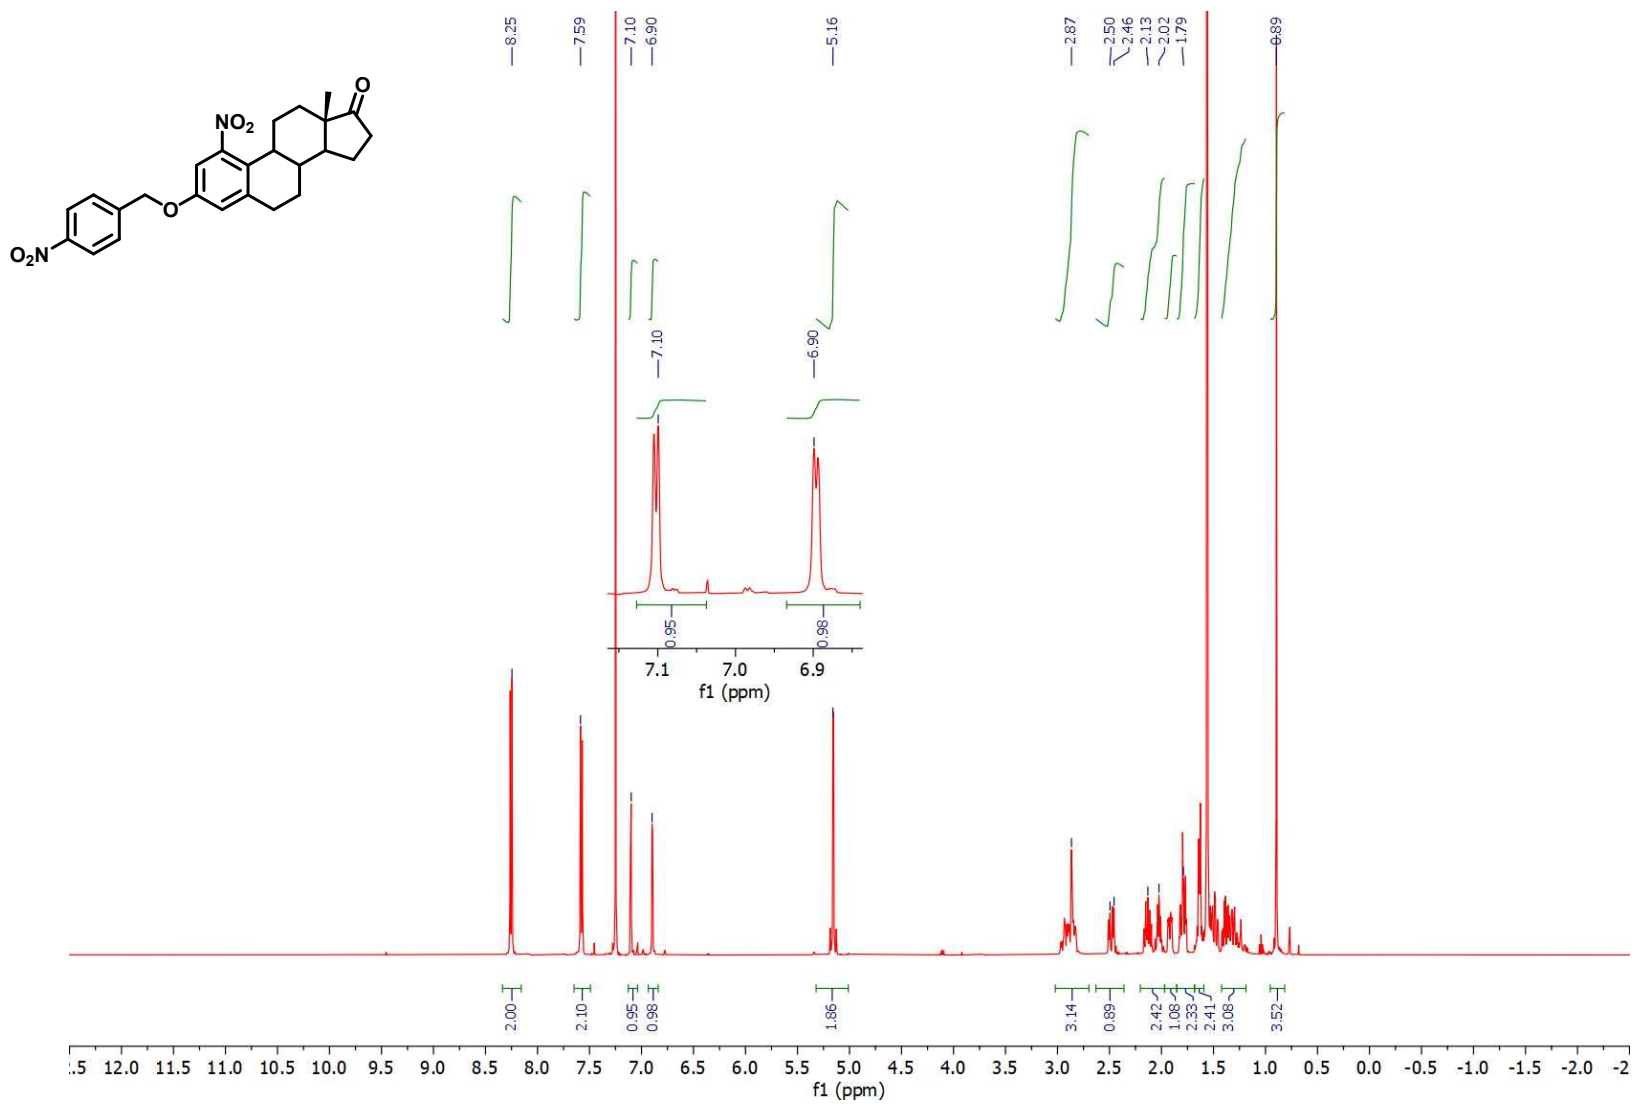

Figure S30 <sup>1</sup>H-NMR spectrum of **compound 8**

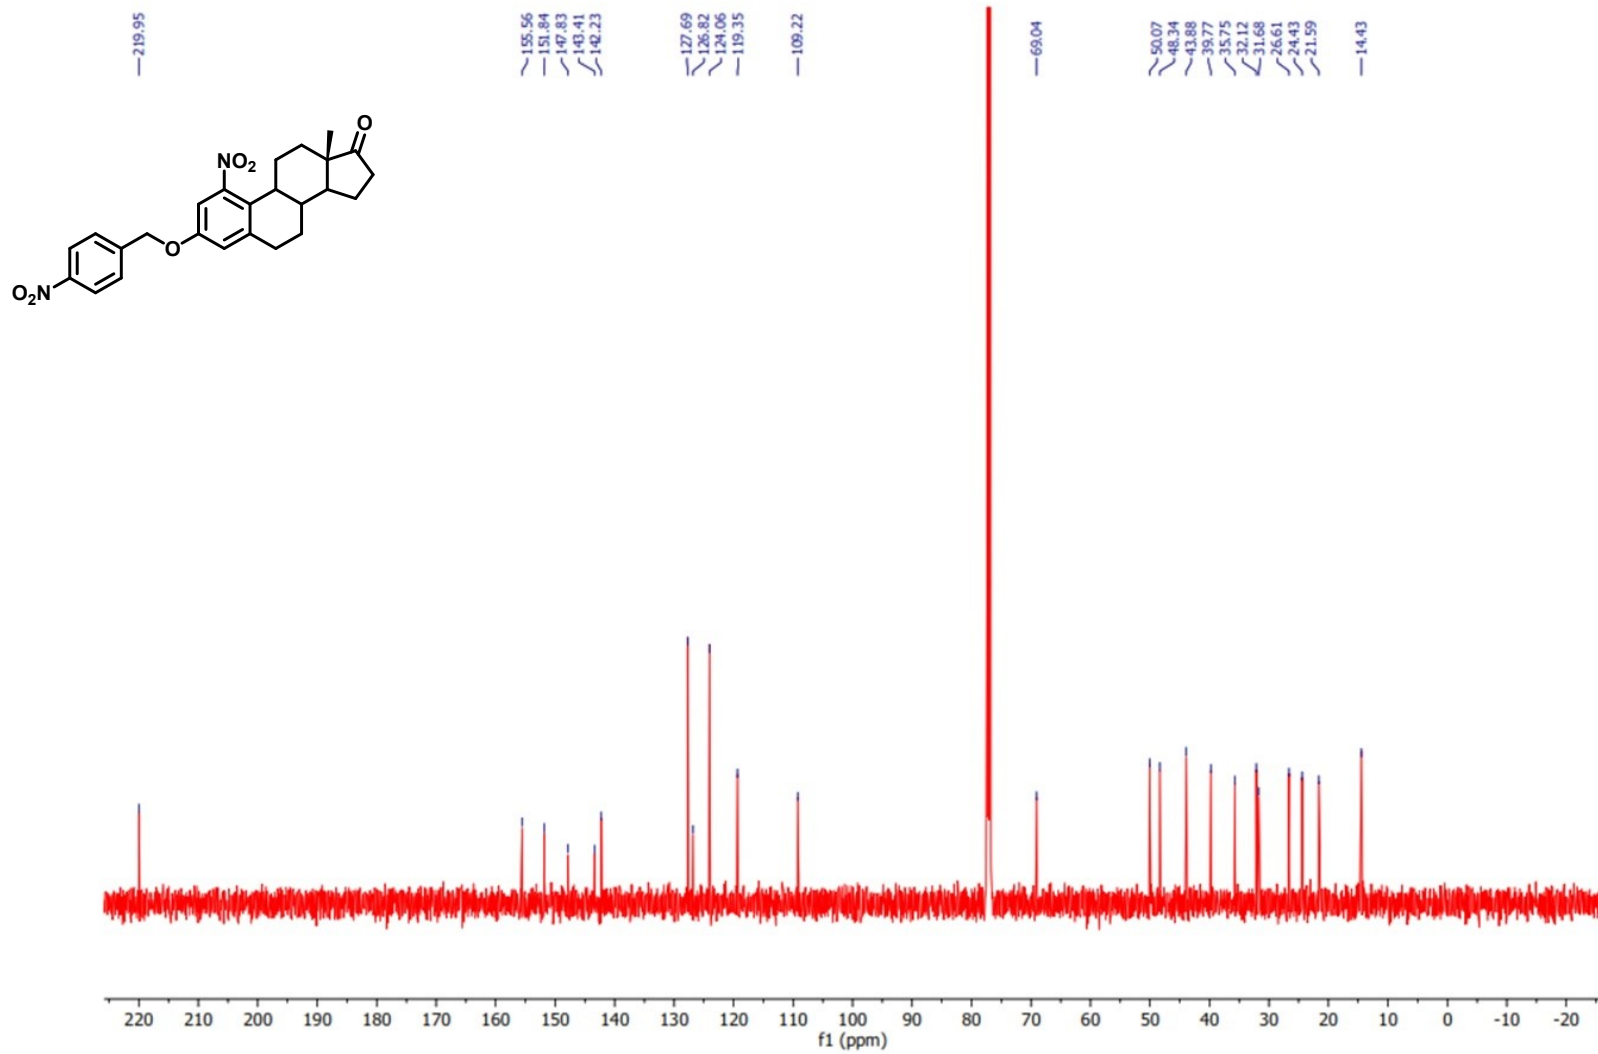

Figure S31 <sup>13</sup>C-NMR spectrum of compound 8

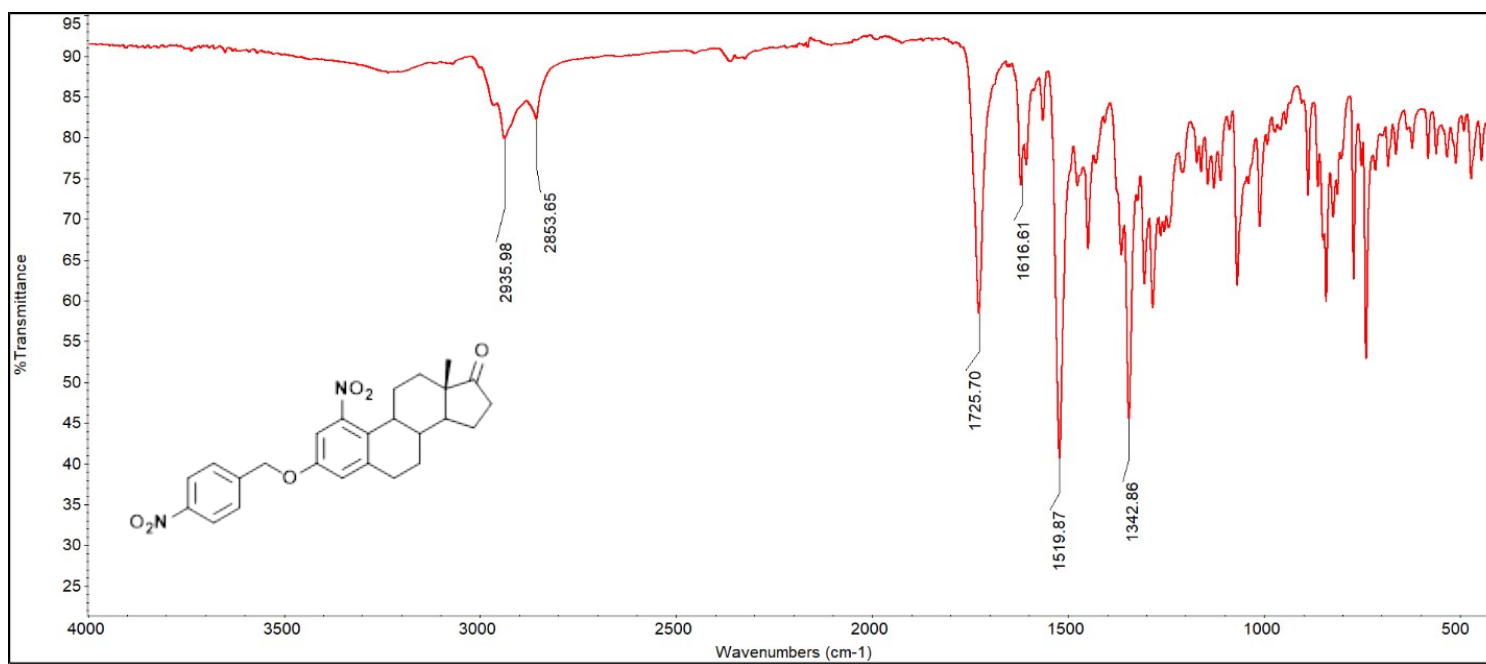

**Figure S32** FTIR-spectrum of **compound 8**

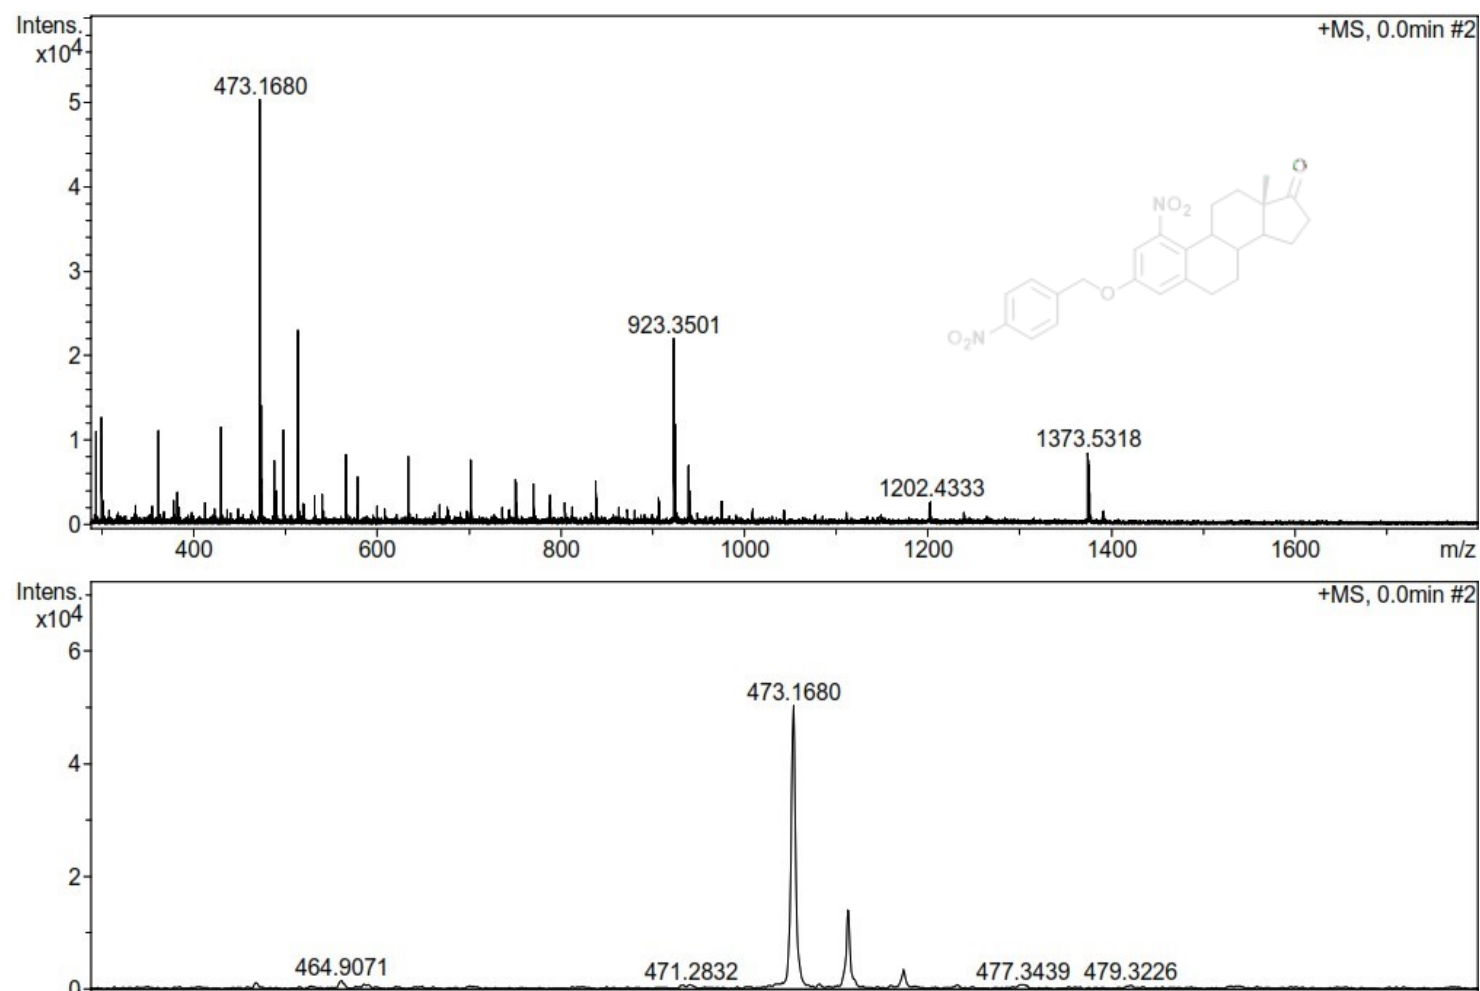

Figure S33 Mass spectrum of compound 8

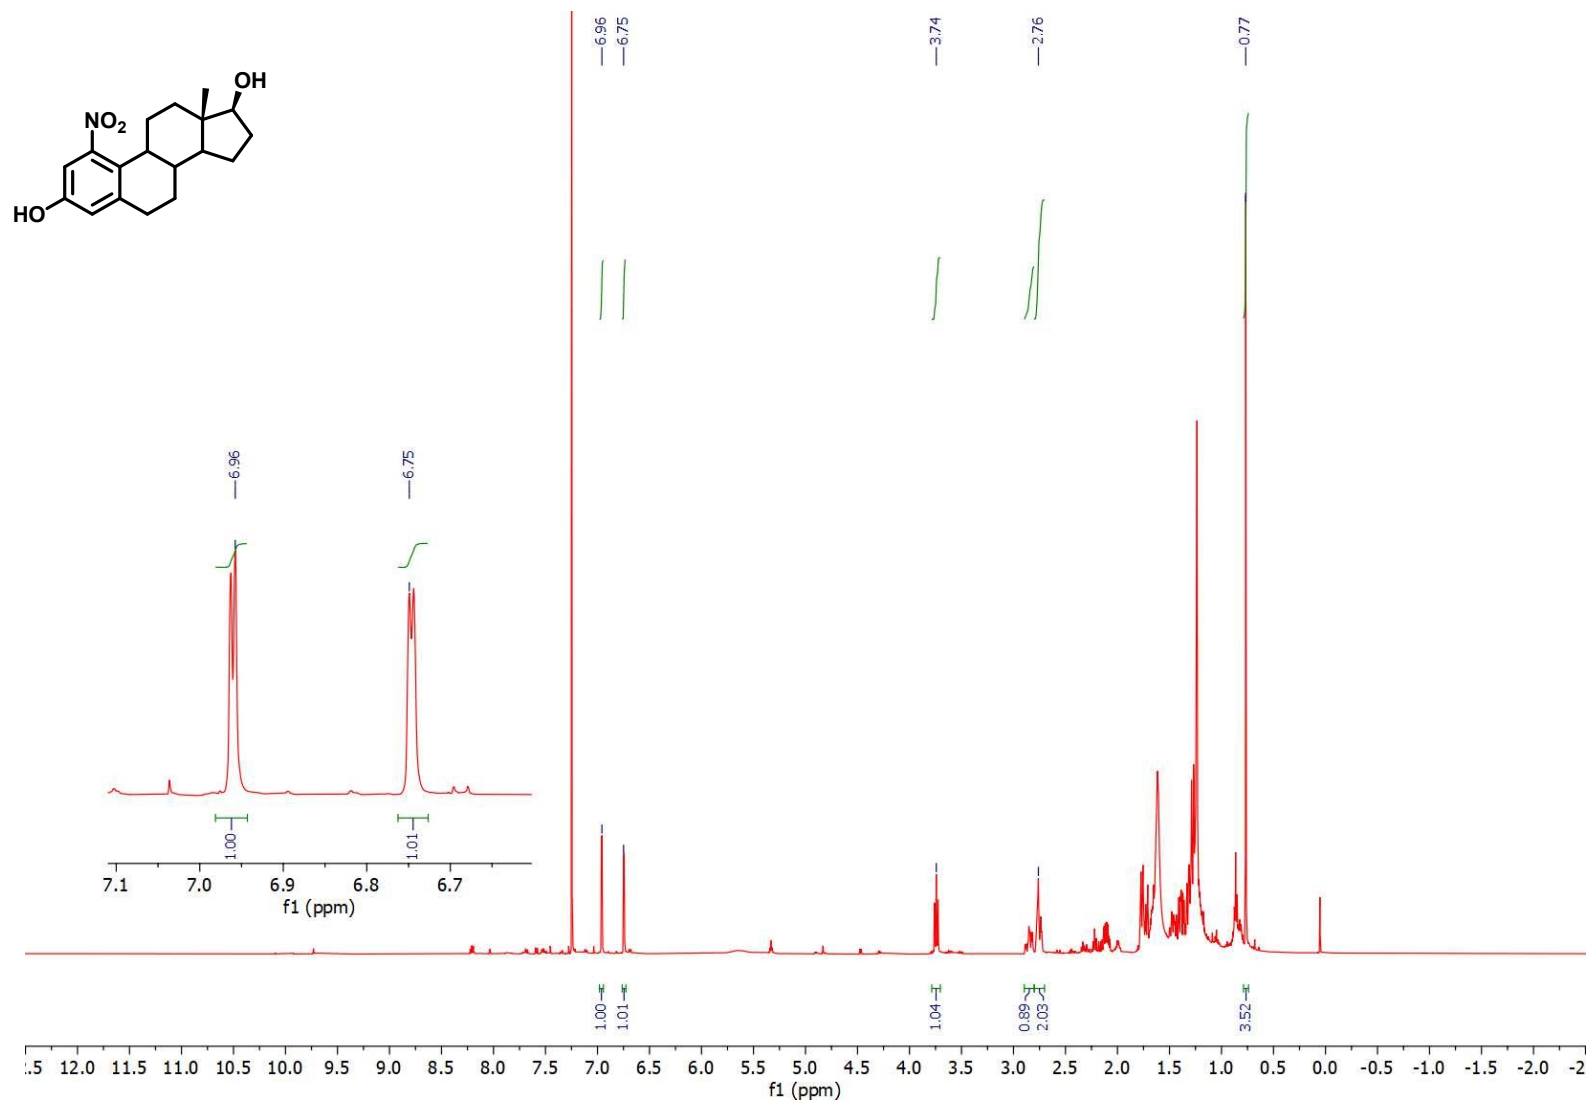

Figure S34 <sup>1</sup>H-NMR spectrum of compound 9

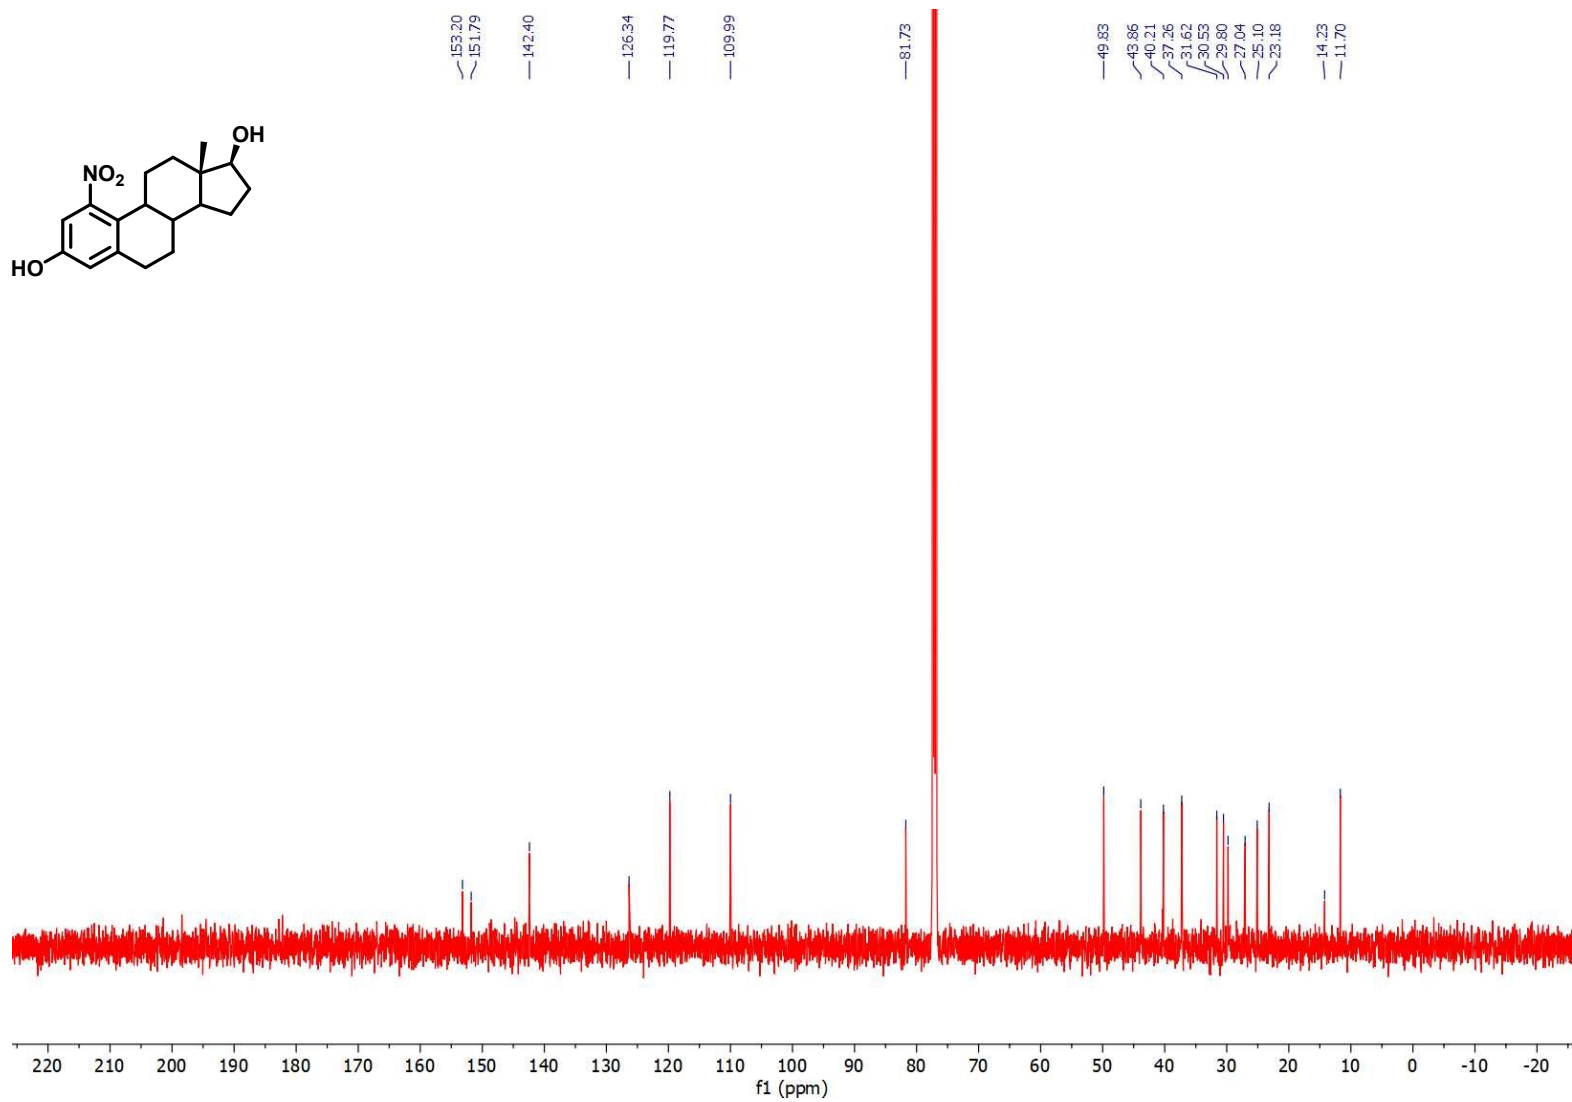

Figure S35 <sup>13</sup>C-NMR spectrum of compound 9

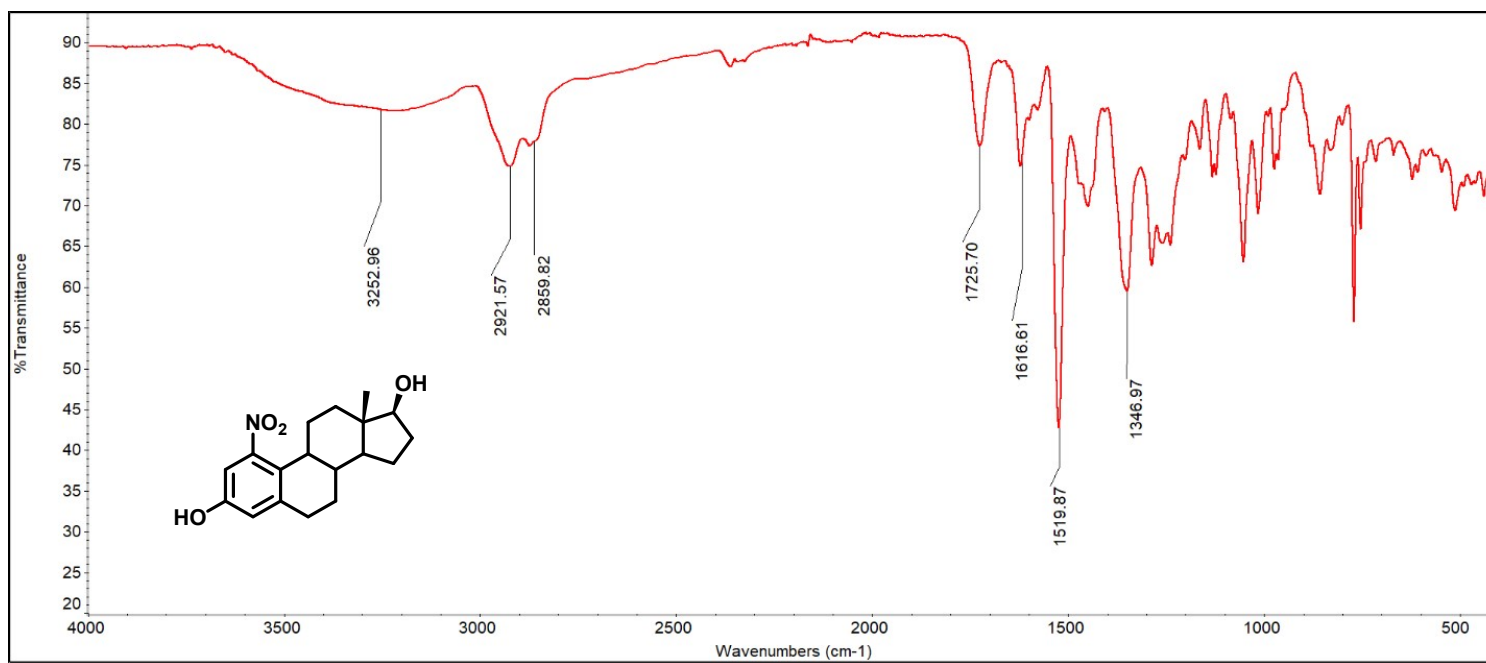

Figure S36 FTIR-spectrum of **compound 9**

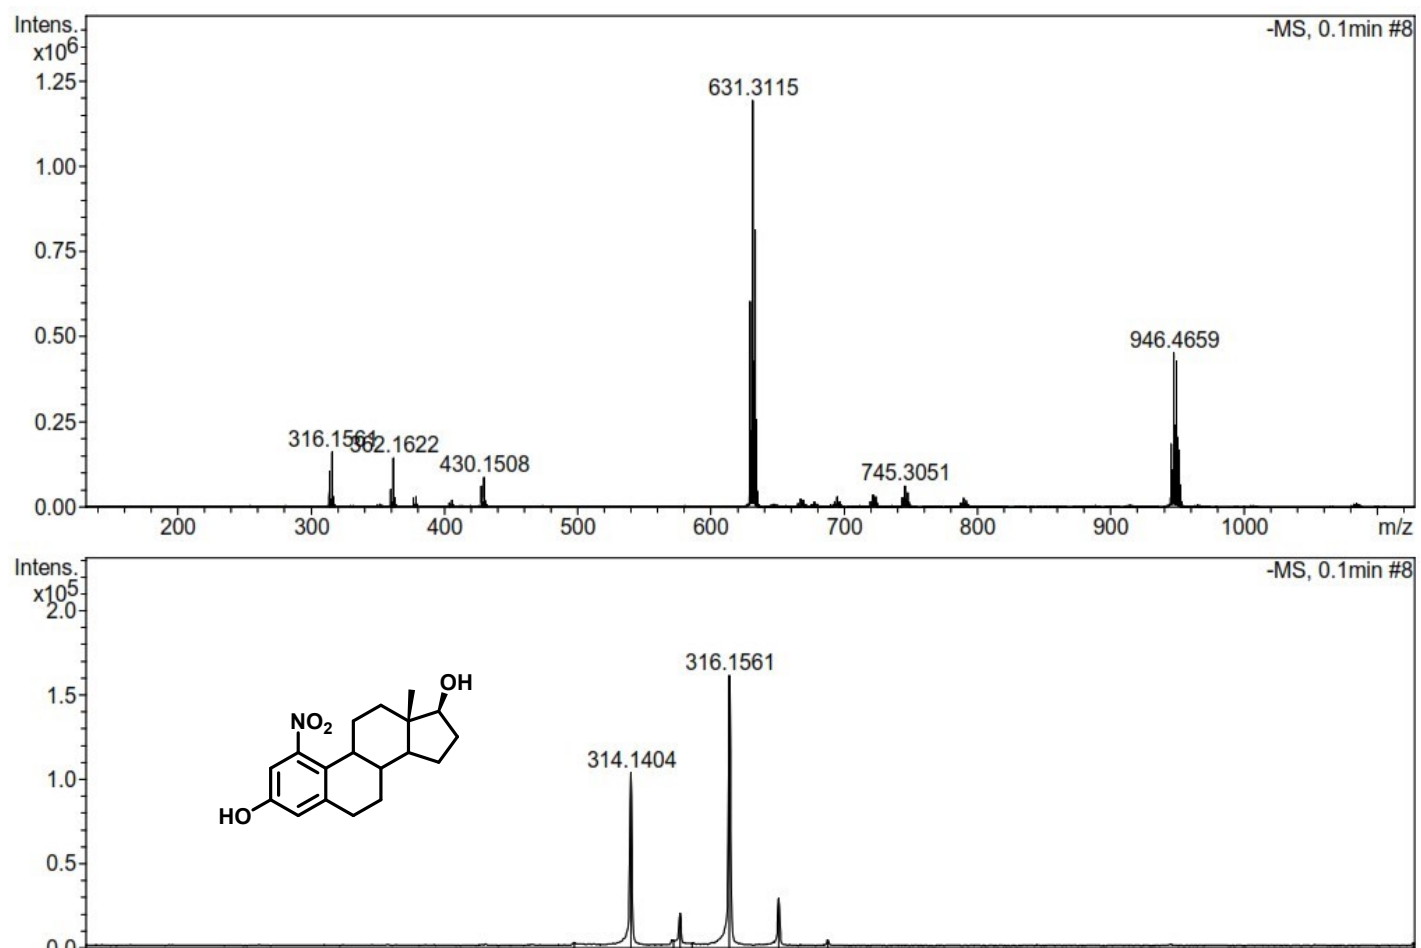

Figure S37 Mass spectrum of compound 9

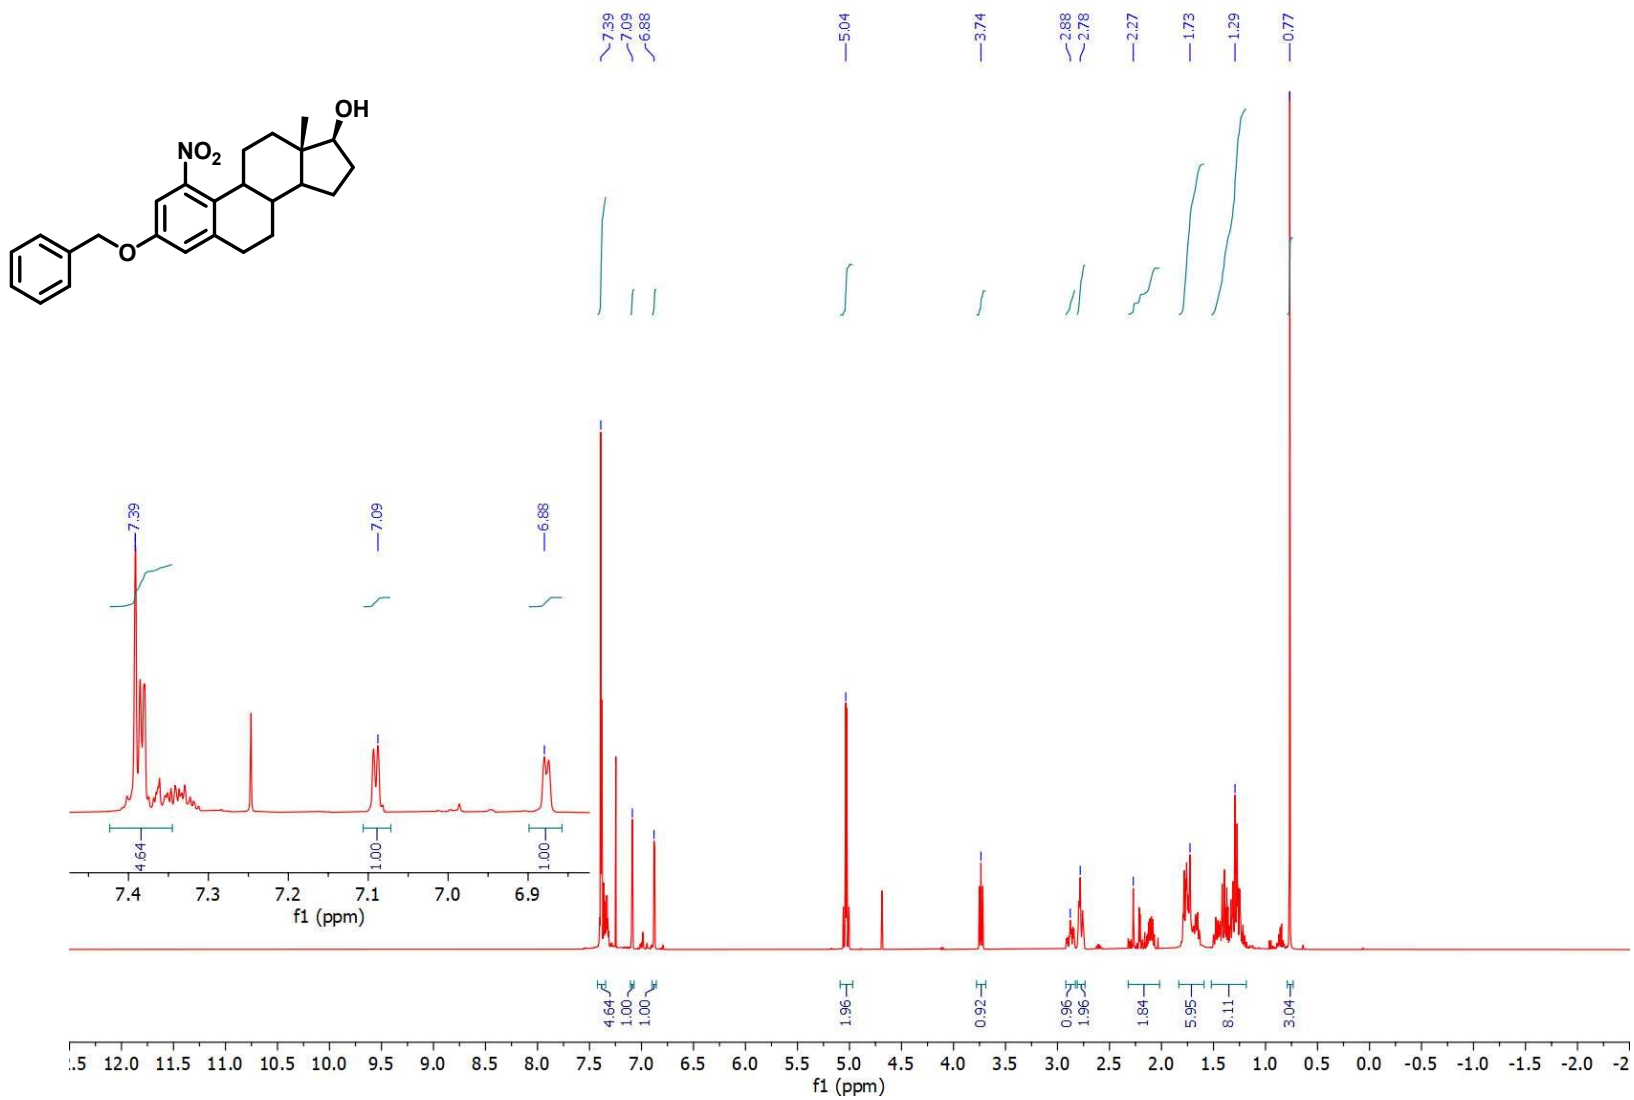

Figure S38 <sup>1</sup>H-NMR spectrum of **3-(benzyloxy)-1-nitro-esradiol**

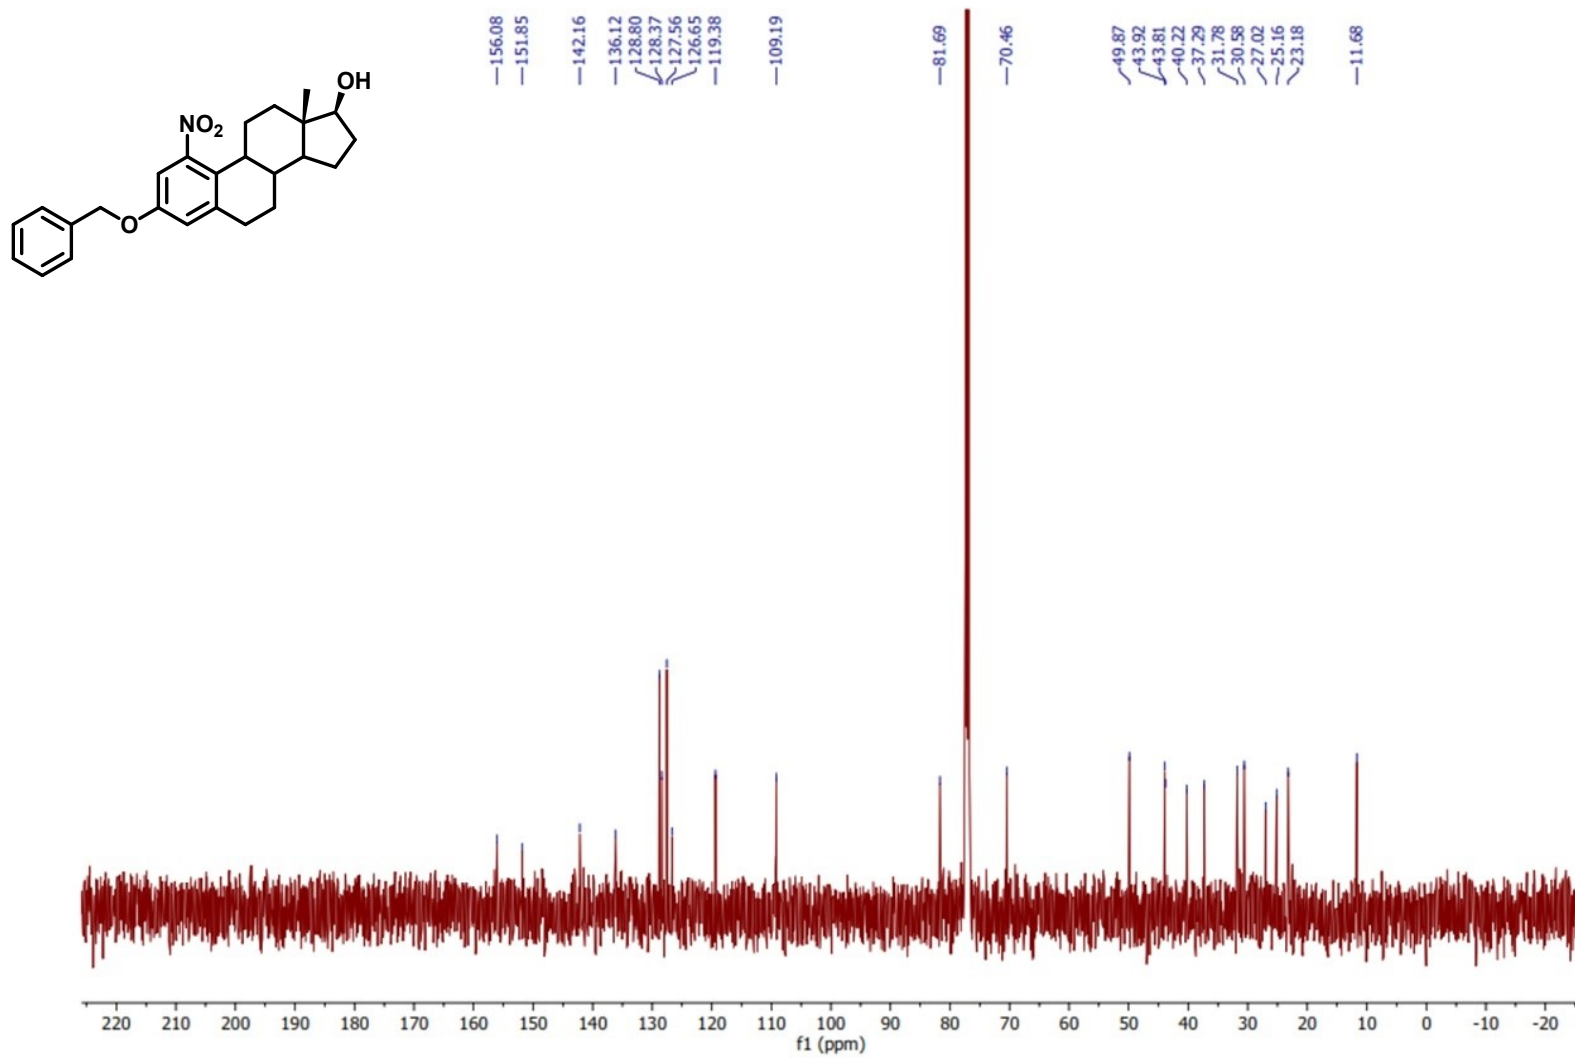

Figure S39  $^{13}\text{C}$ -NMR spectrum of 3-(benzyloxy)-1-nitro-esradiol

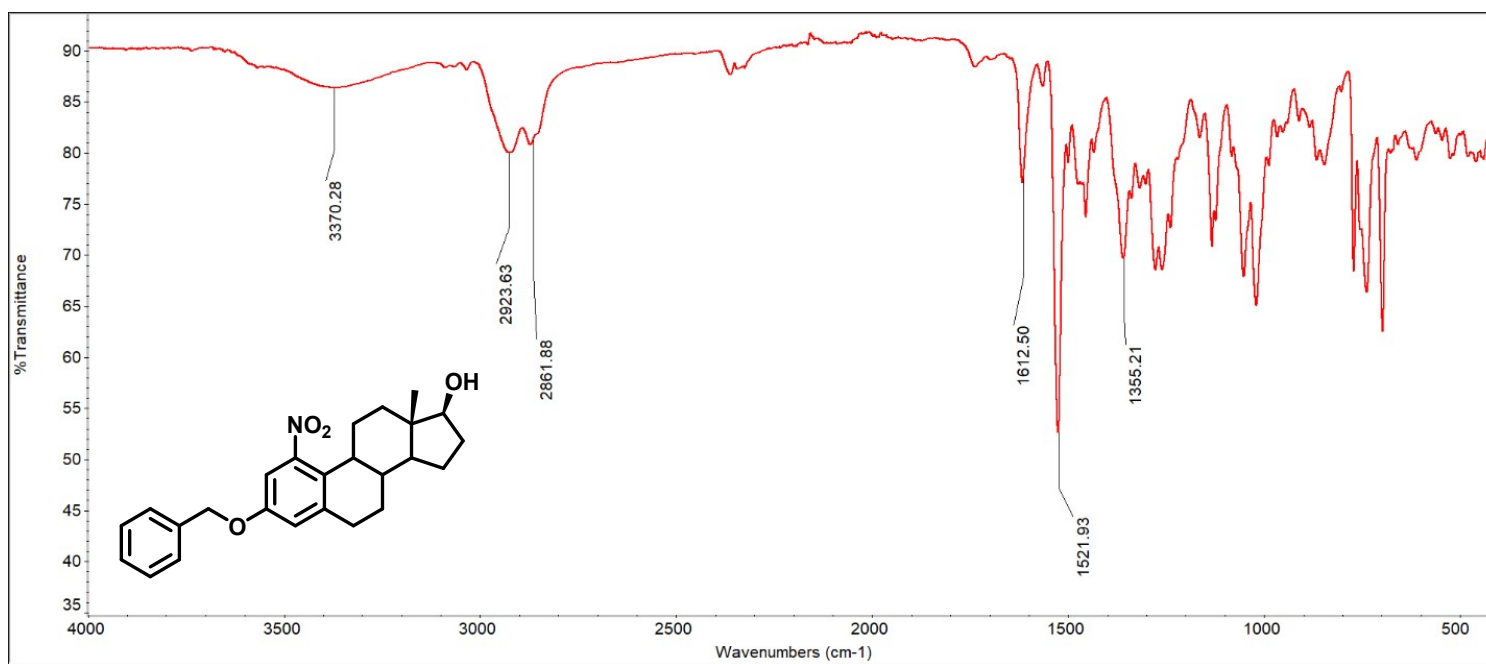

**Figure S40** FTIR-spectrum of **3-(benzyloxy)-1-nitro-esradiol**

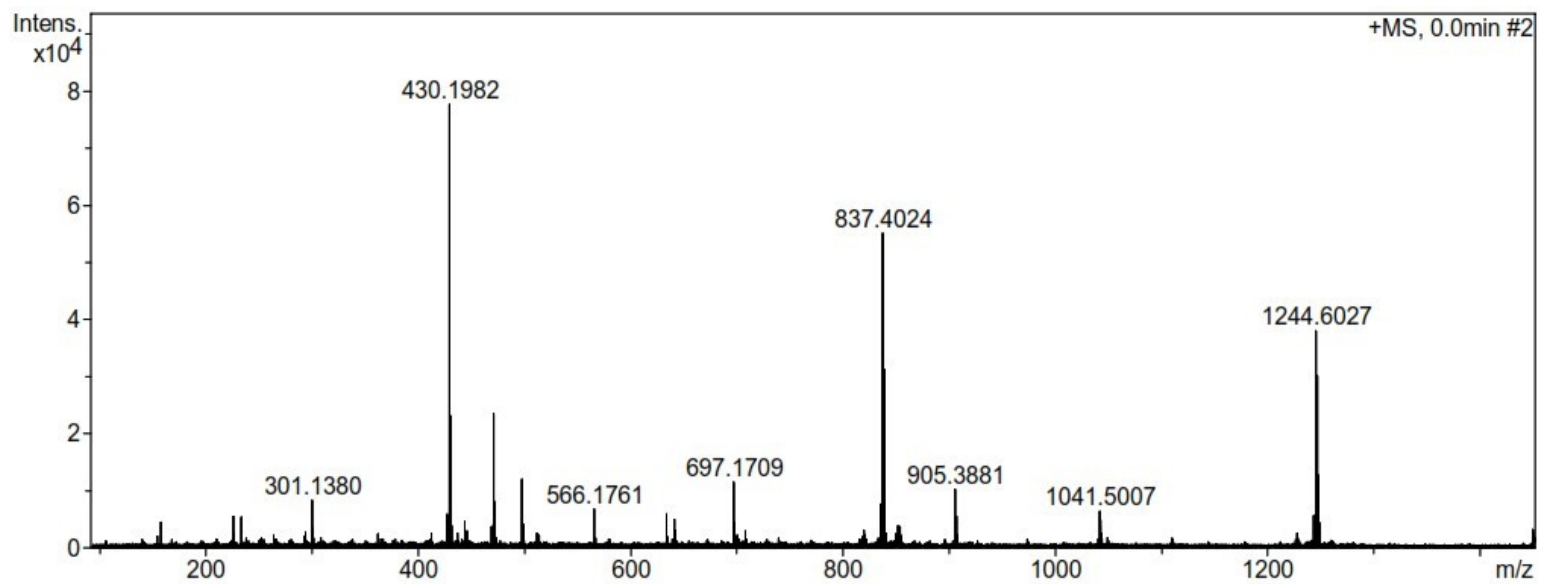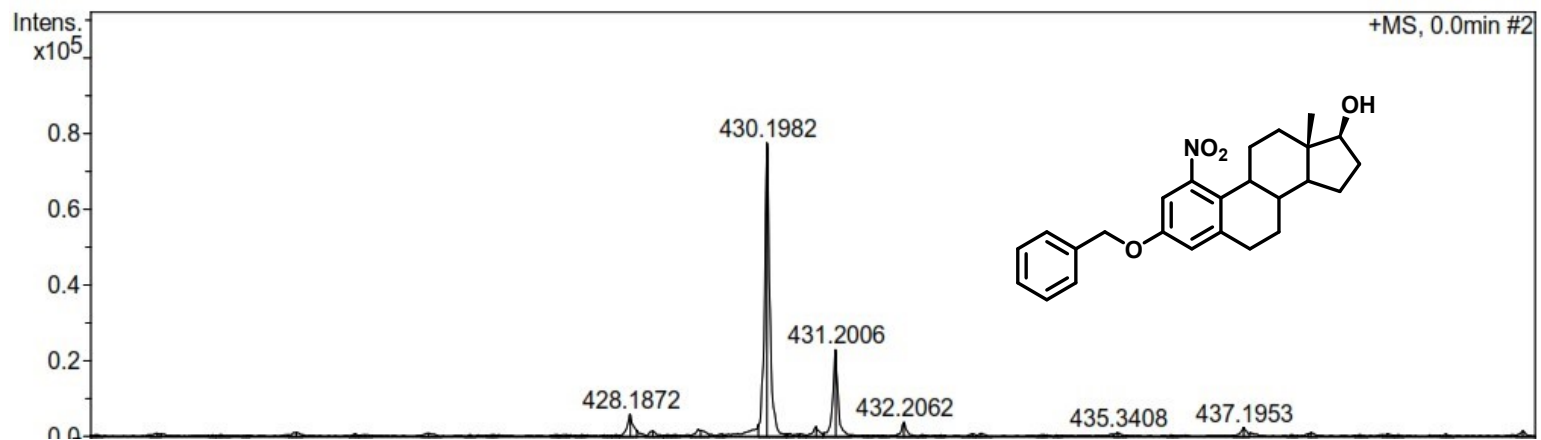

Figure S41 Mass spectrum of 3-(benzyloxy)-1-nitro-esradiol

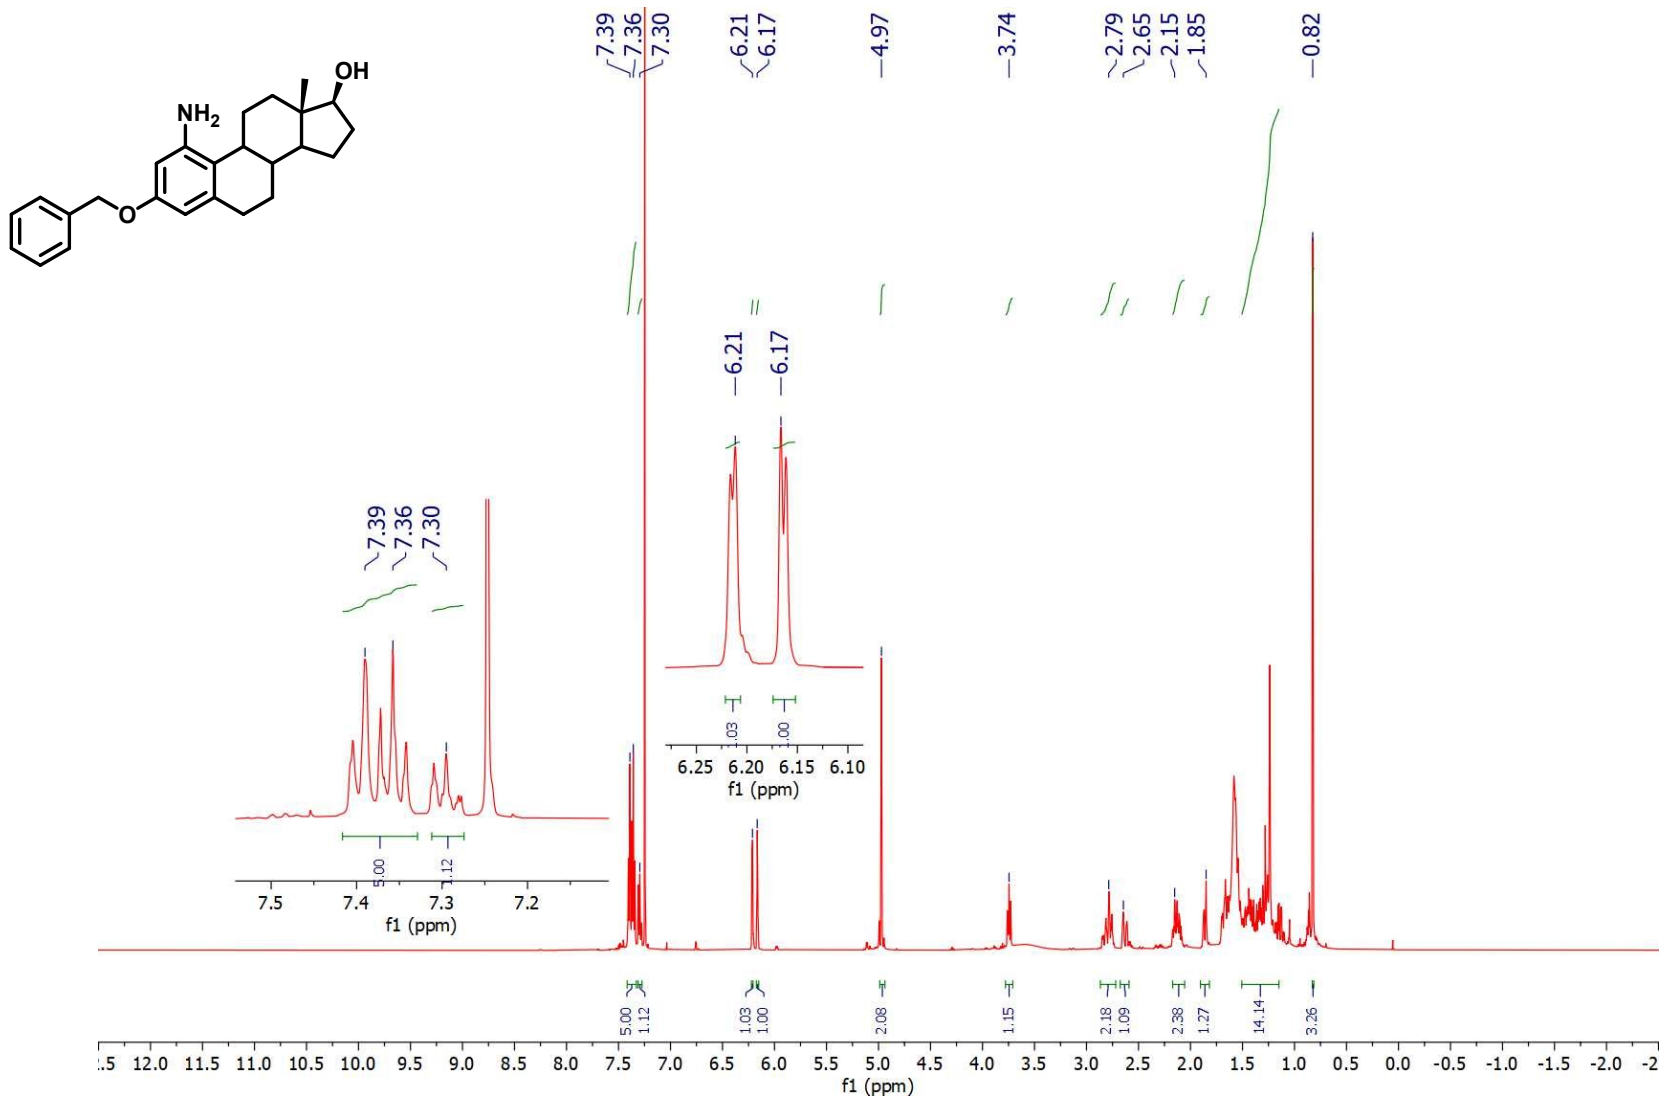

Figure S42 <sup>1</sup>H-NMR spectrum of compound 10

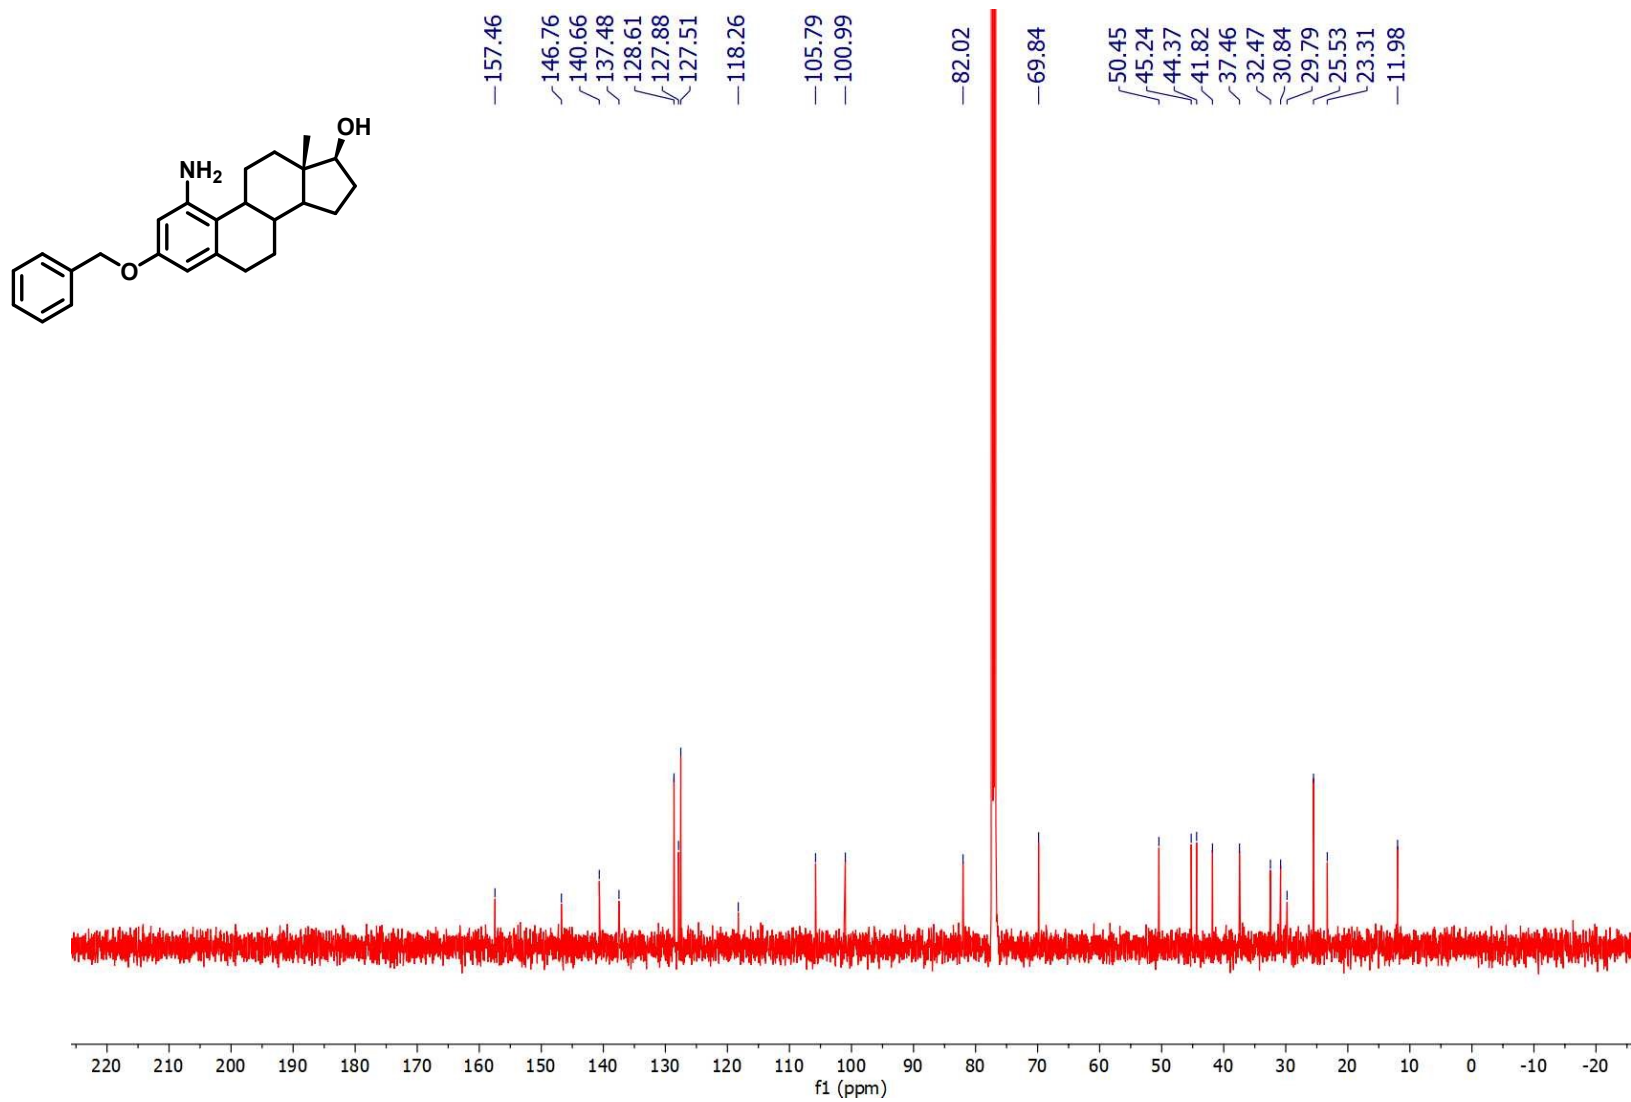

Figure S43 <sup>13</sup>C-NMR spectrum of compound 10

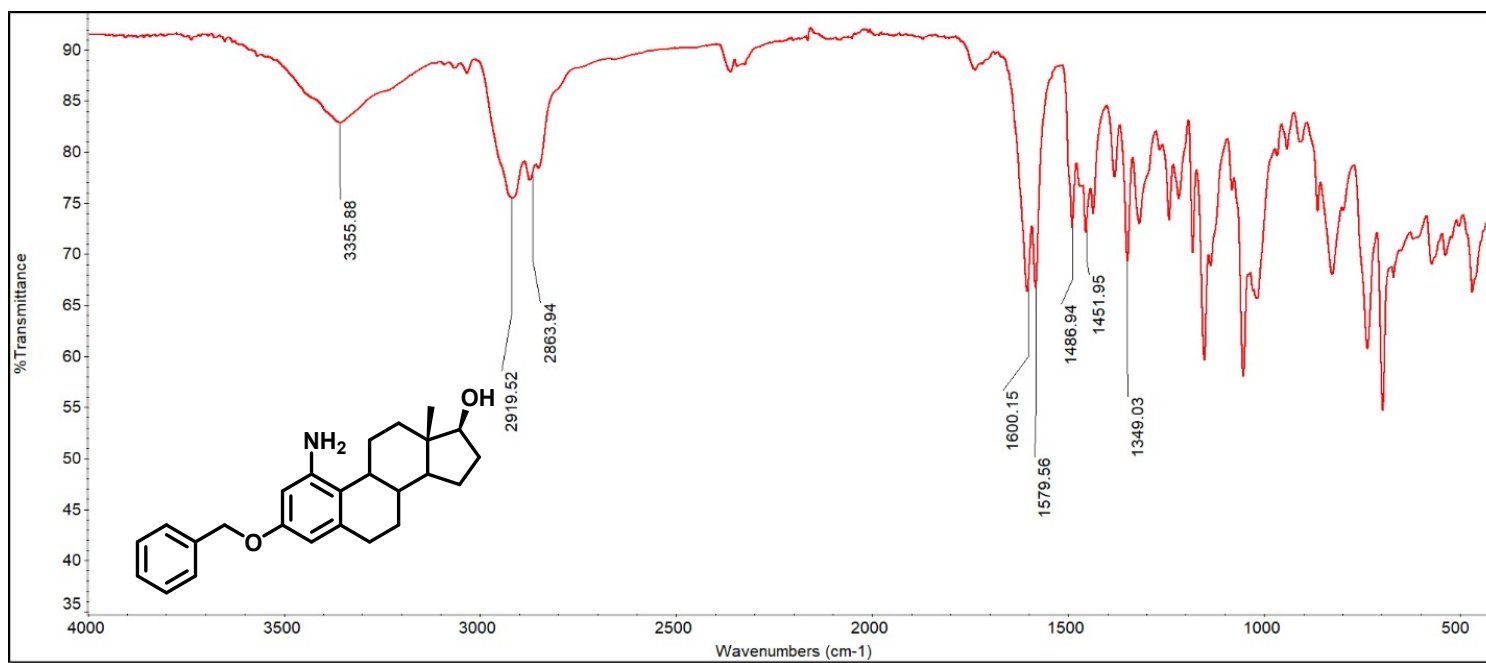

Figure S44 FTIR-spectrum of **compound 10**

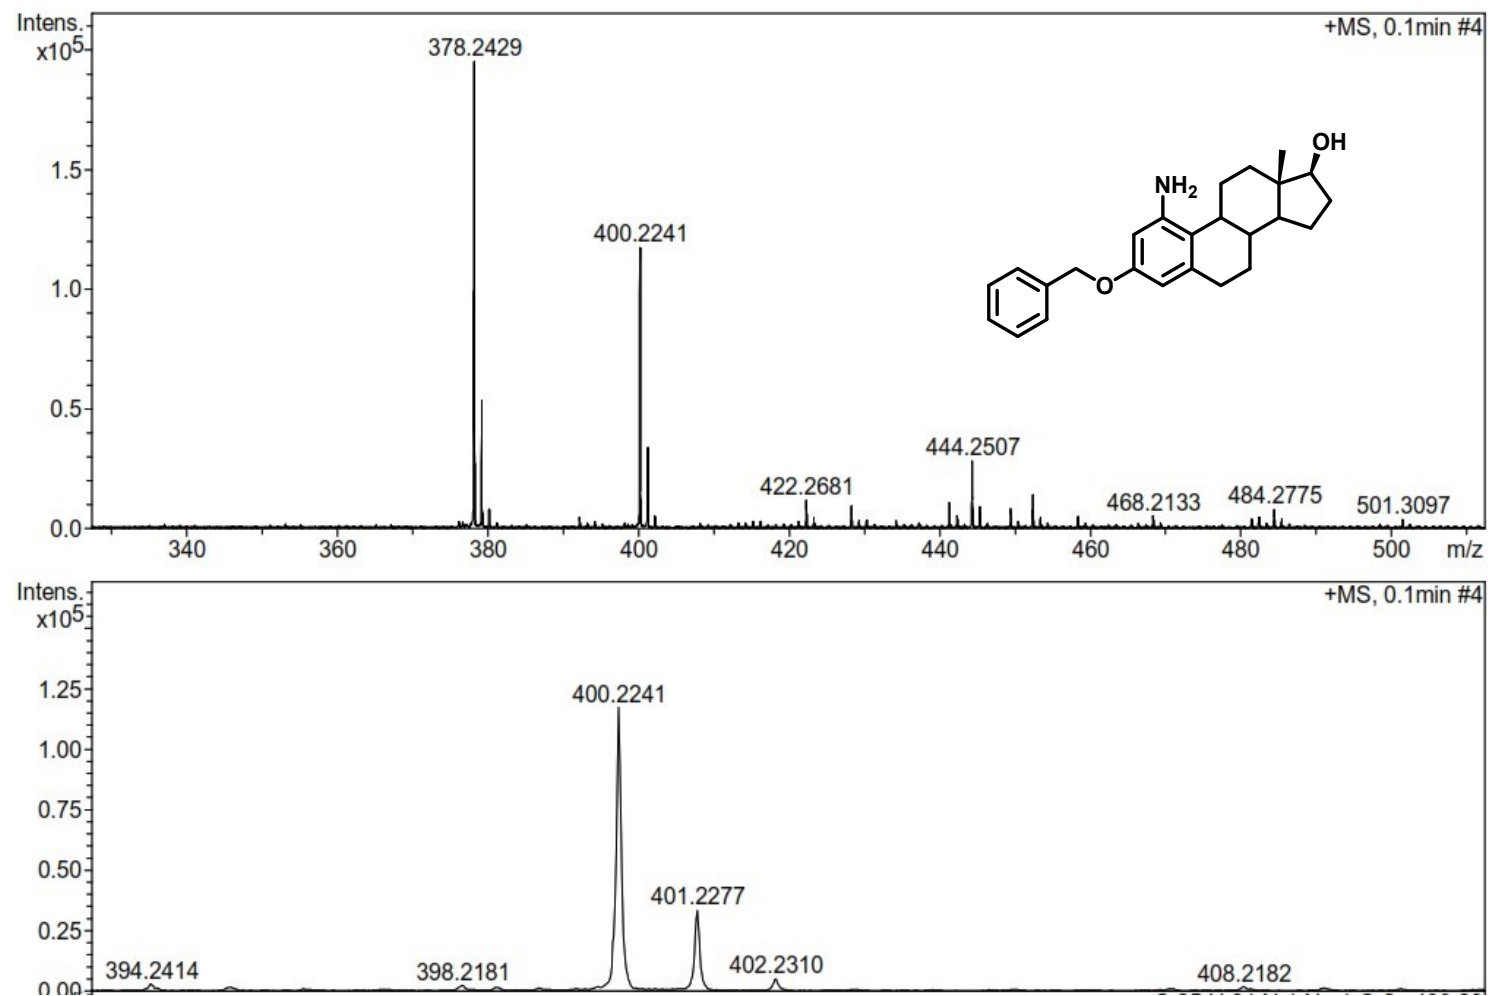

Figure S45 Mass spectrum of compound 10

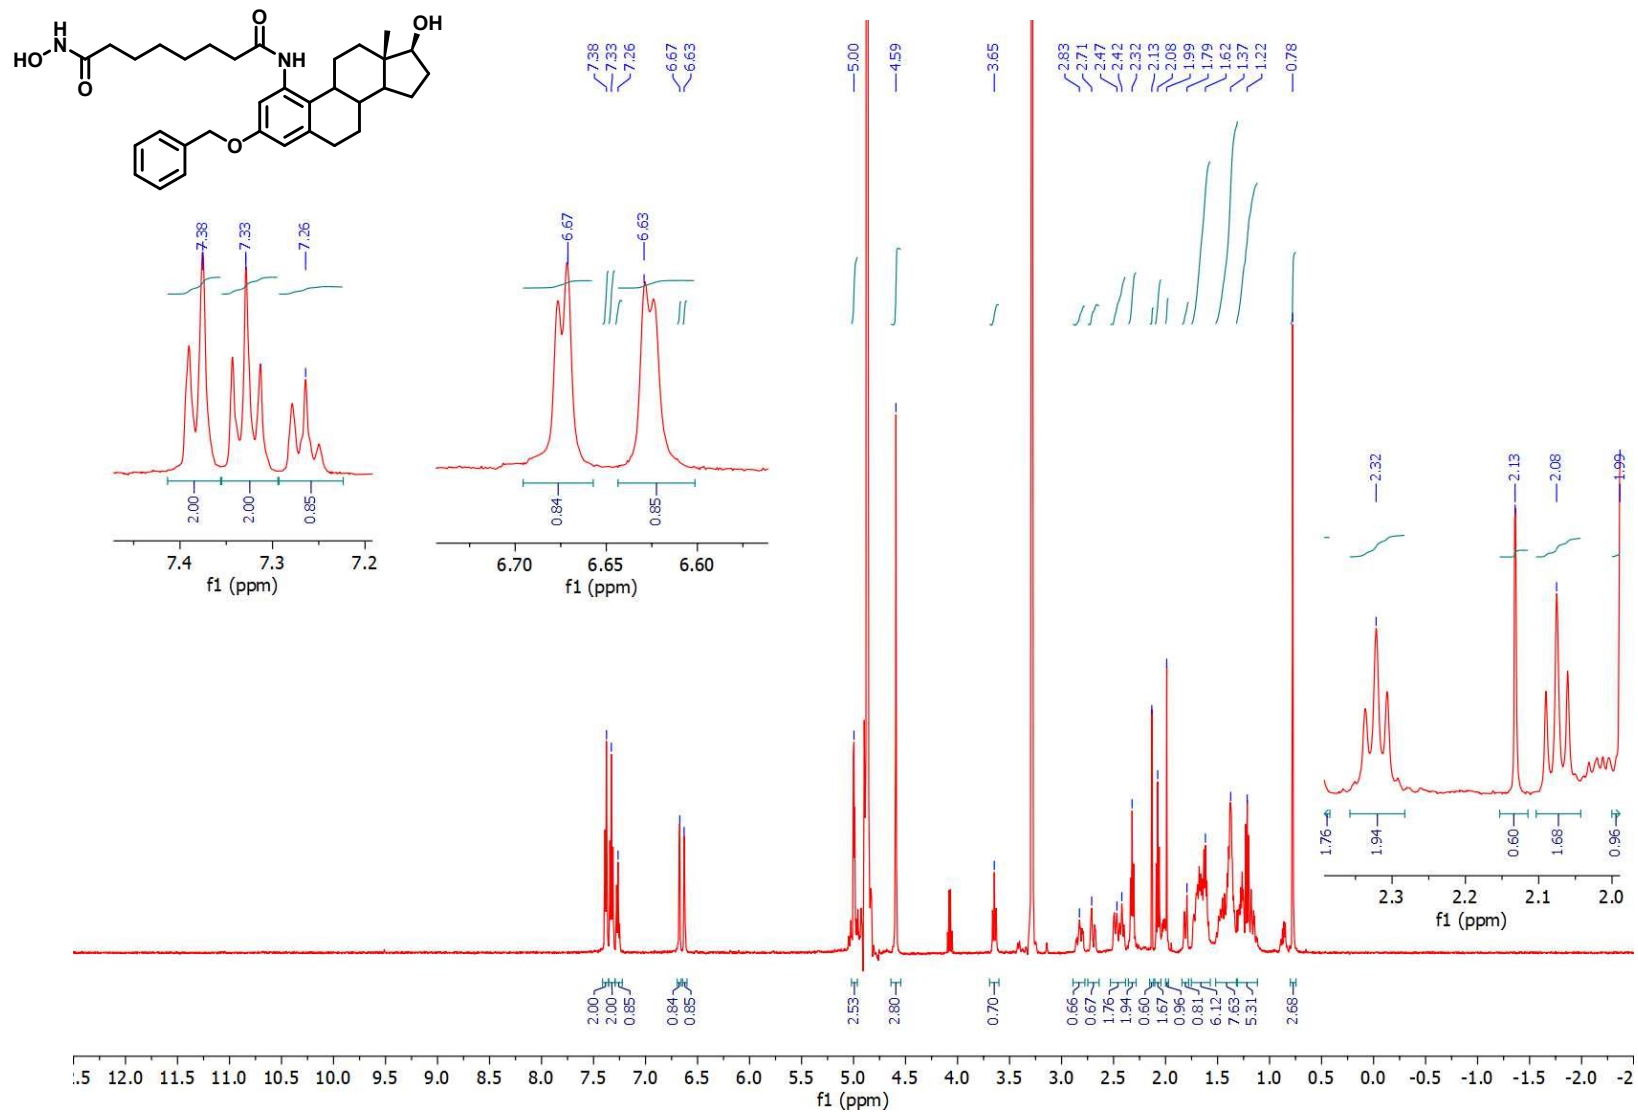

Figure S46 <sup>1</sup>H-NMR spectrum of compound 11

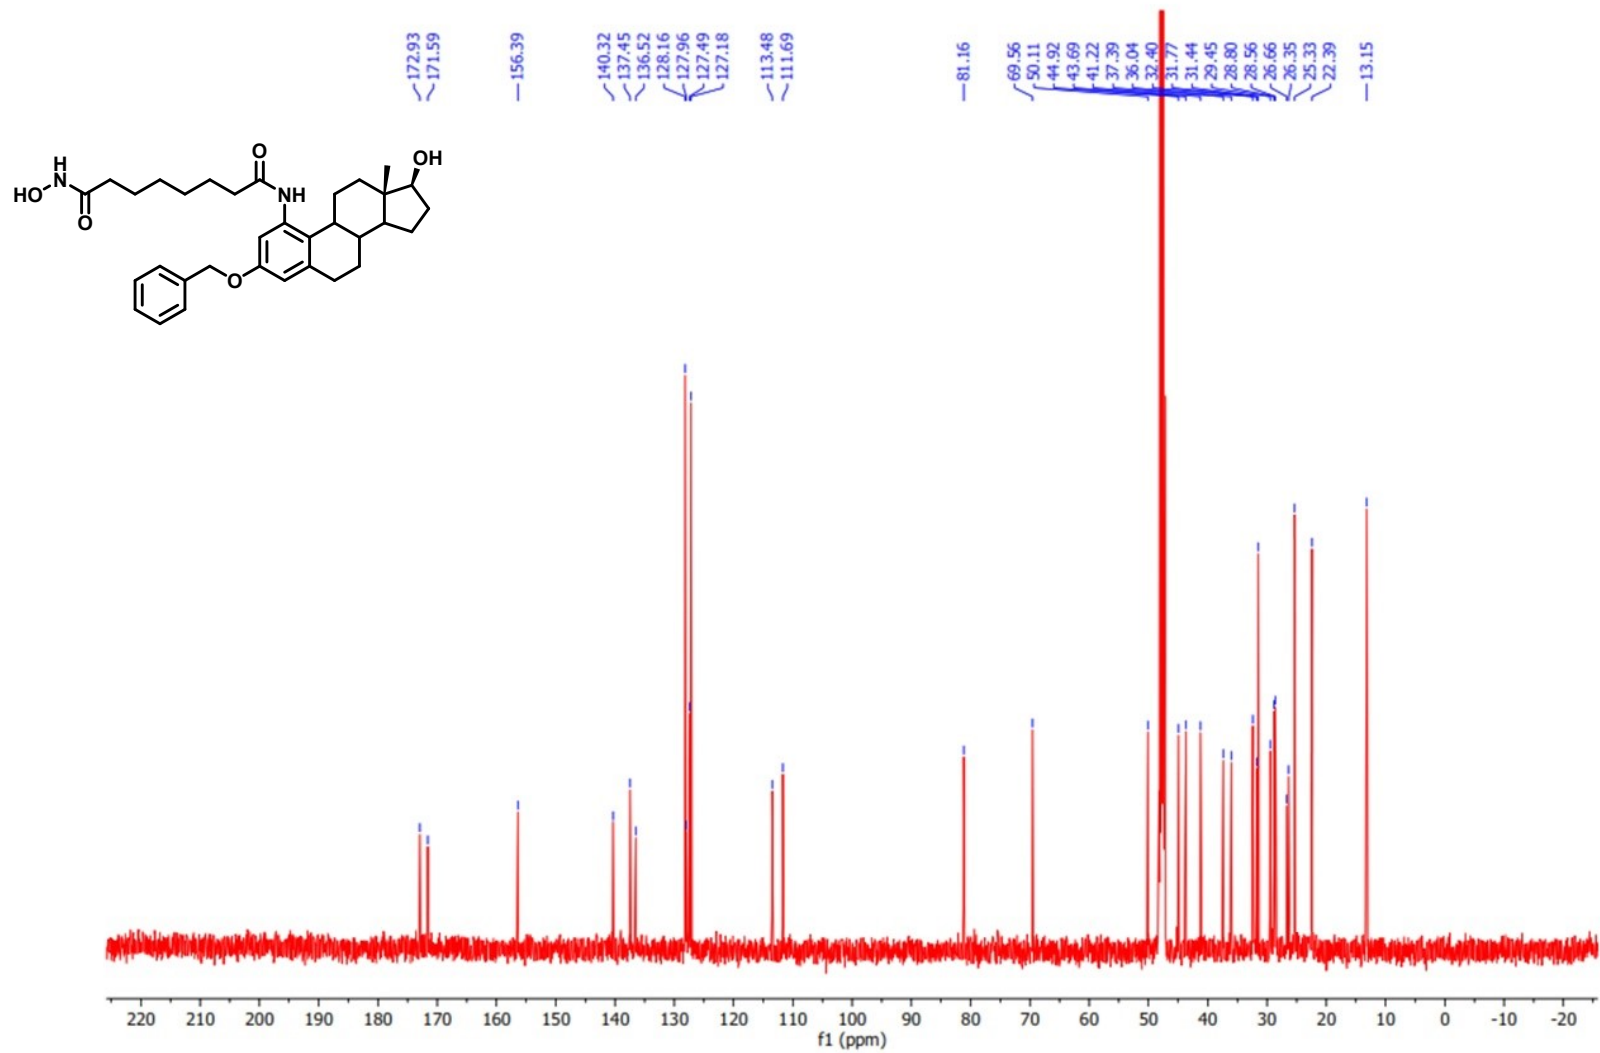

Figure S47 <sup>13</sup>C-NMR spectrum of compound 11

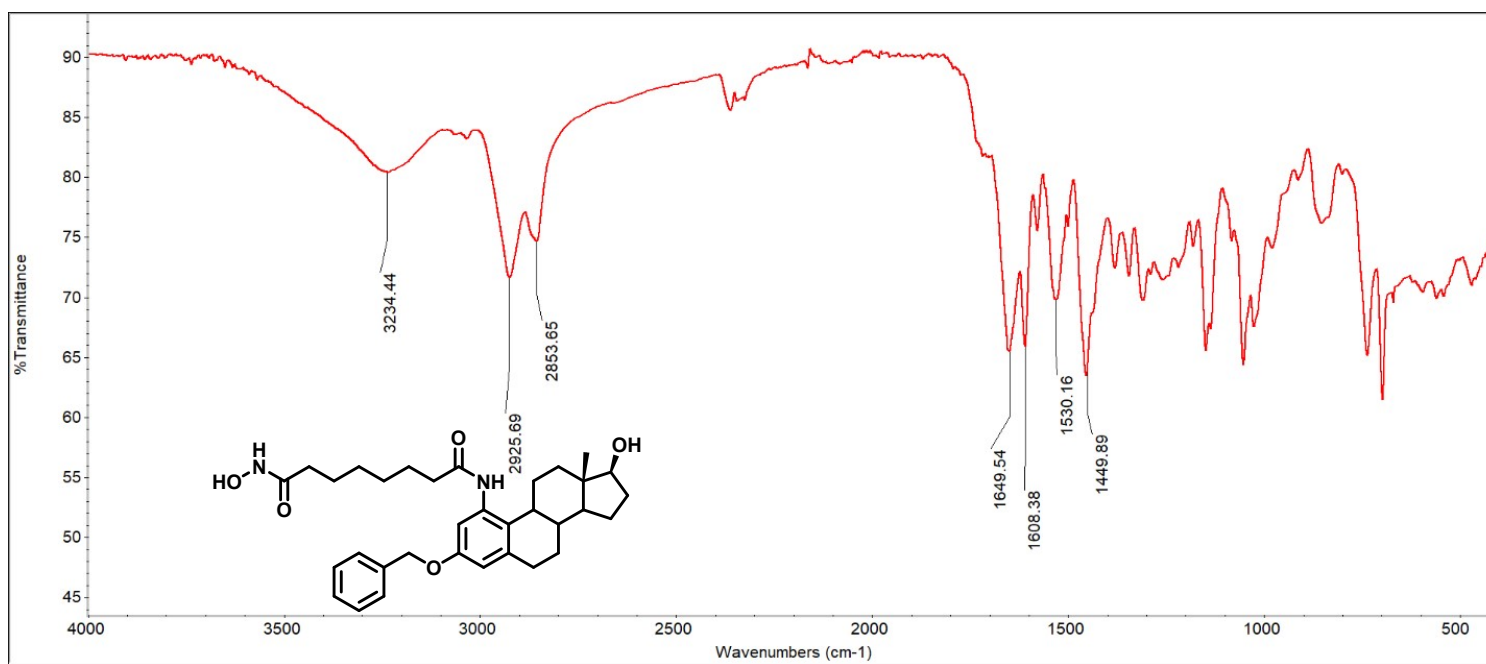

Figure S48 FTIR-spectrum of **compound 11**

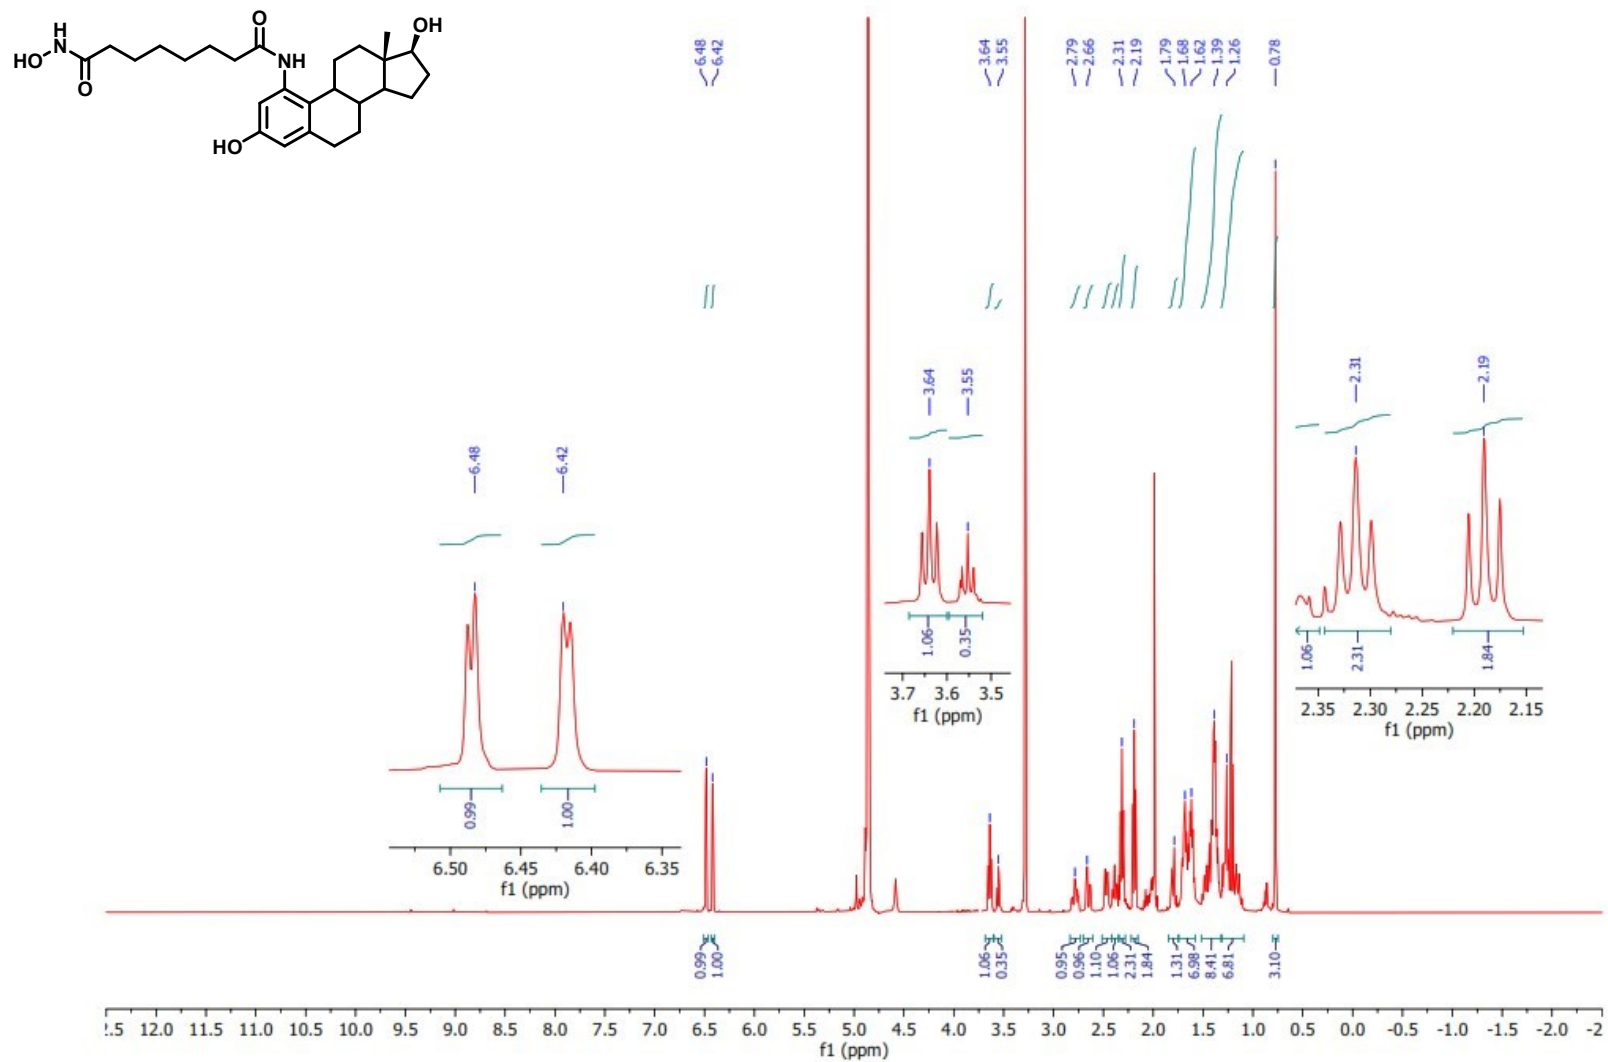

Figure S49 <sup>1</sup>H-NMR spectrum of 1-SEHA

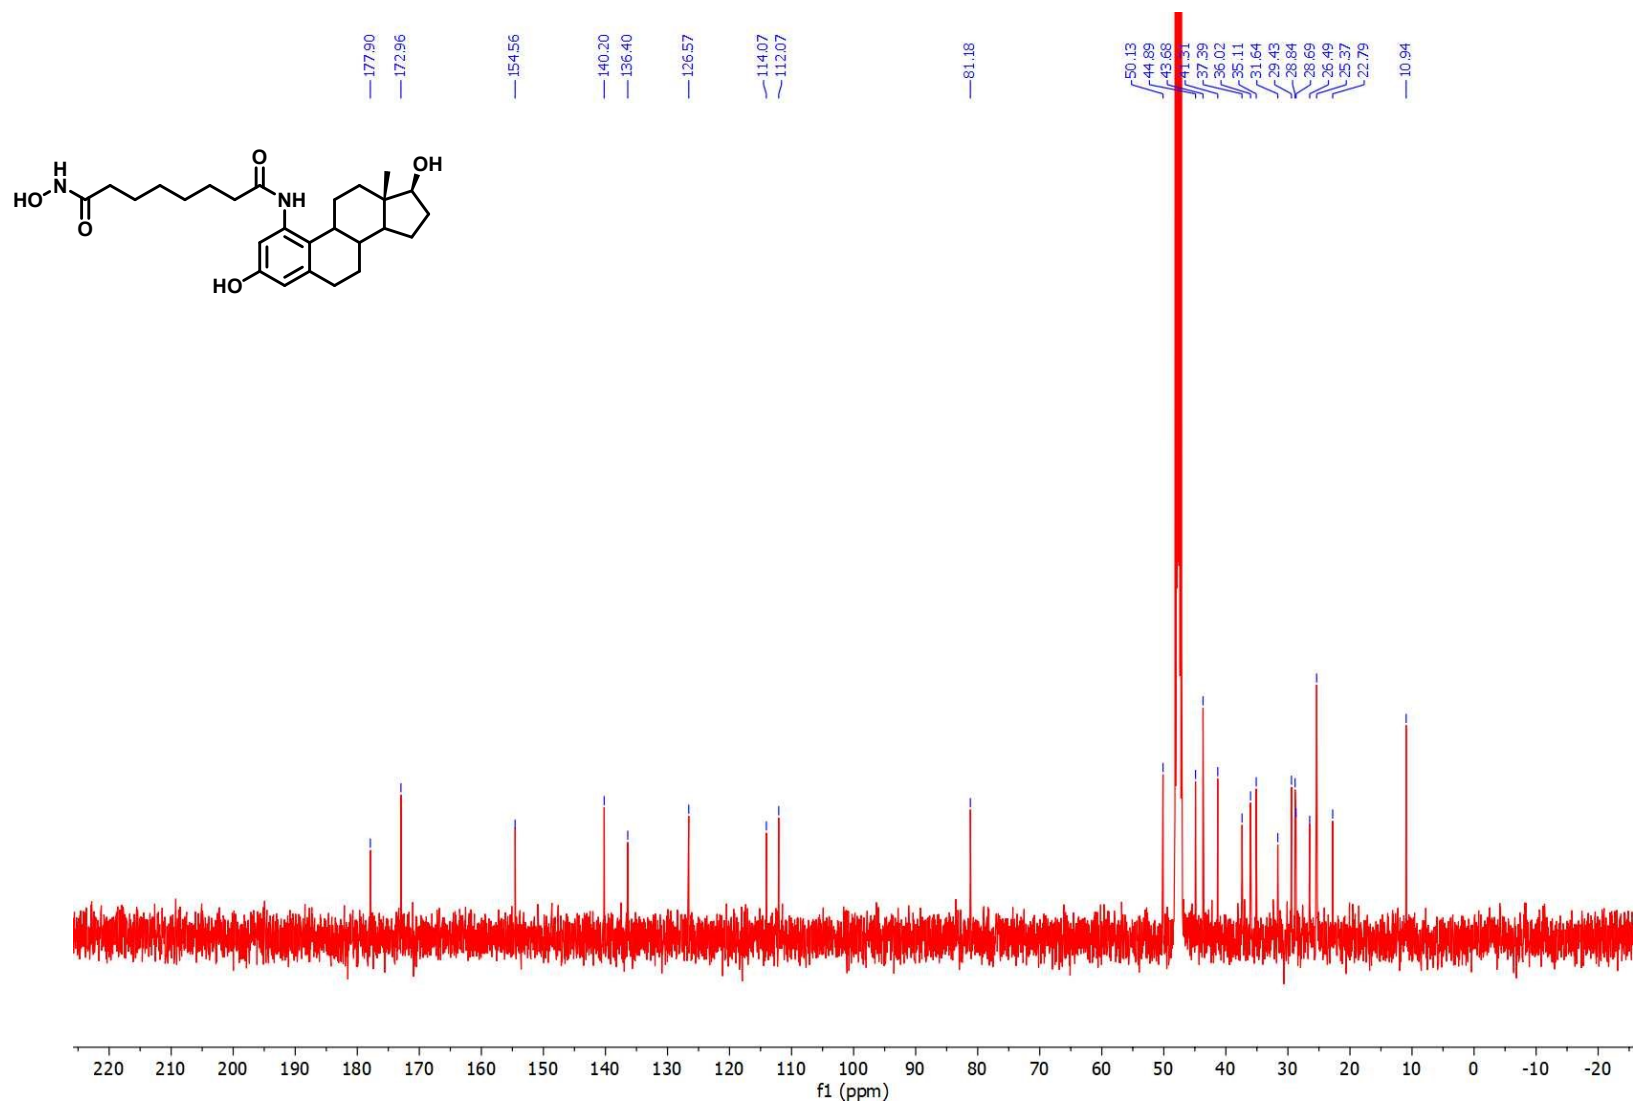

Figure S50 <sup>13</sup>C-NMR spectrum of 1-SEHA

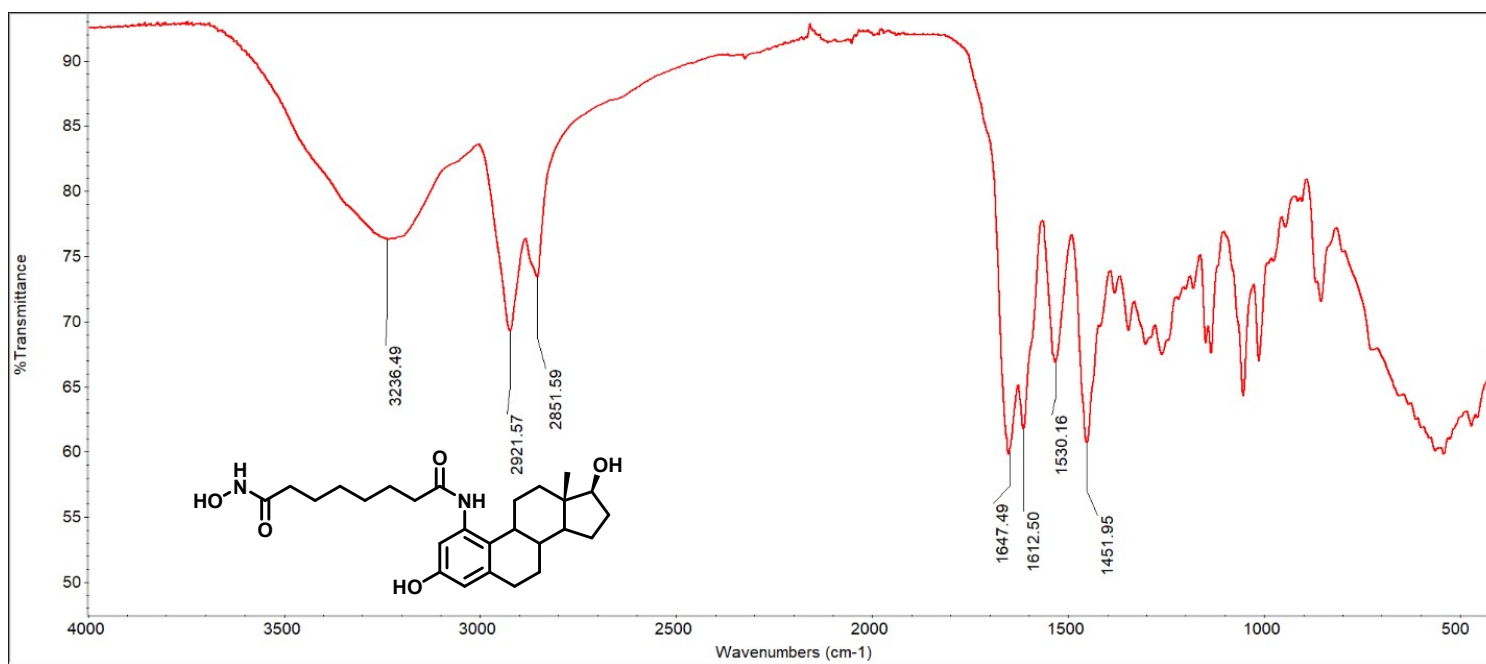

**Figure S51** FTIR-spectrum of **1-SEHA**

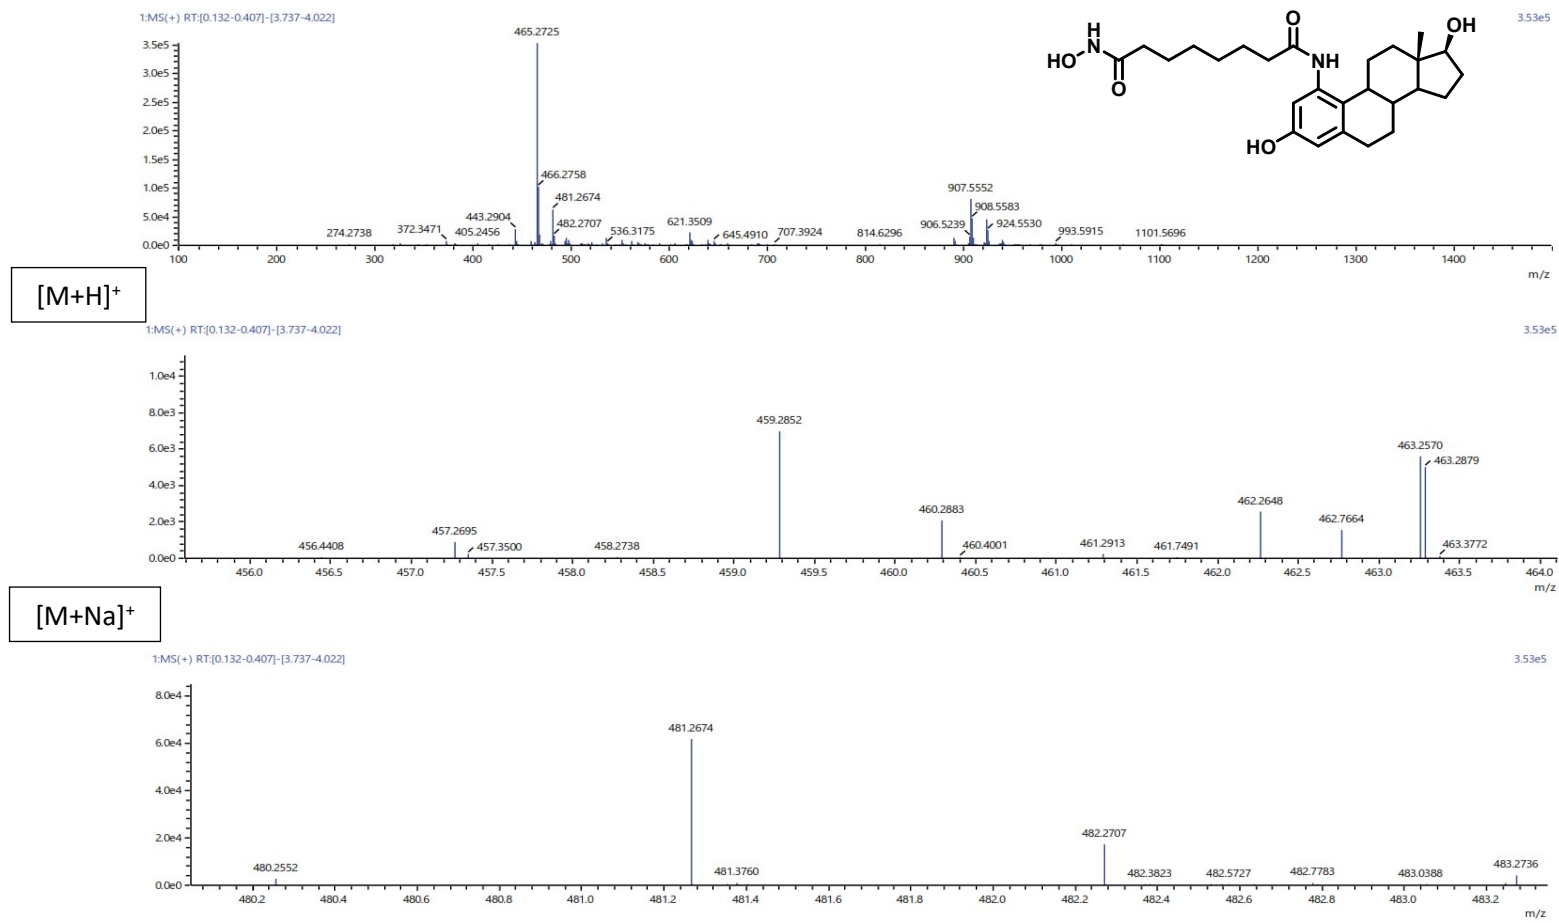

Figure S52 HRMS spectrum of 1-SEHA

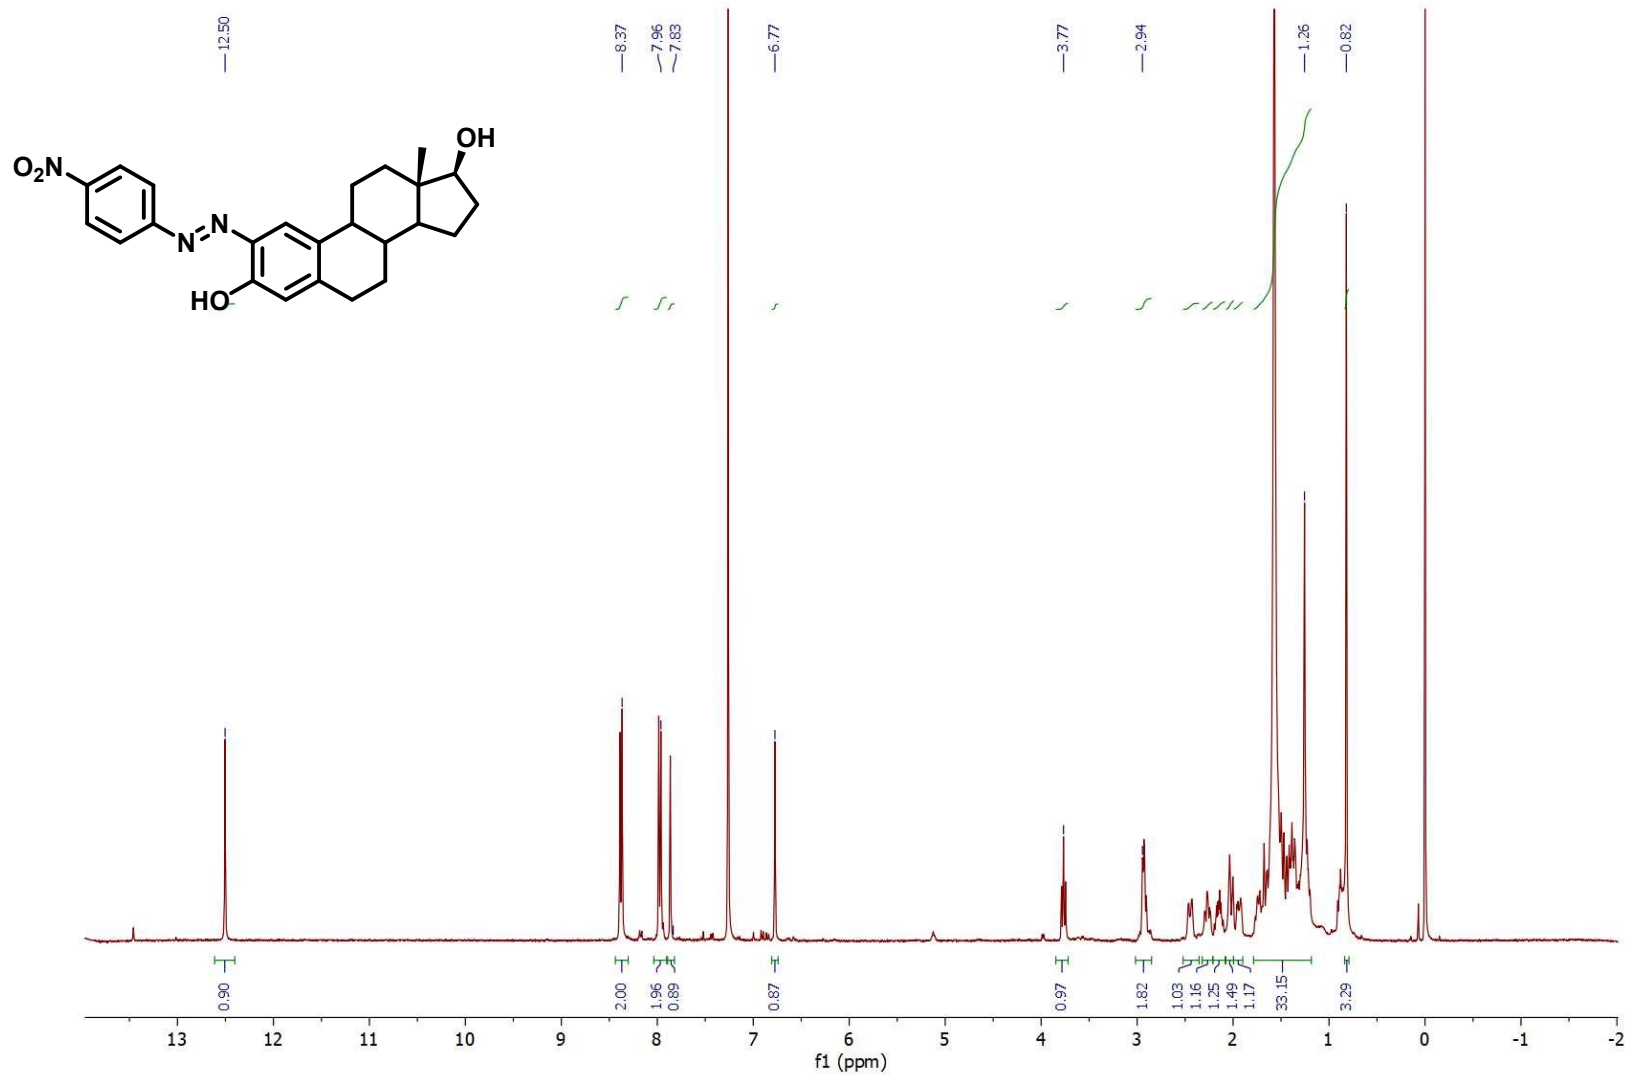

Figure S53 <sup>1</sup>H-NMR spectrum of compound 12a

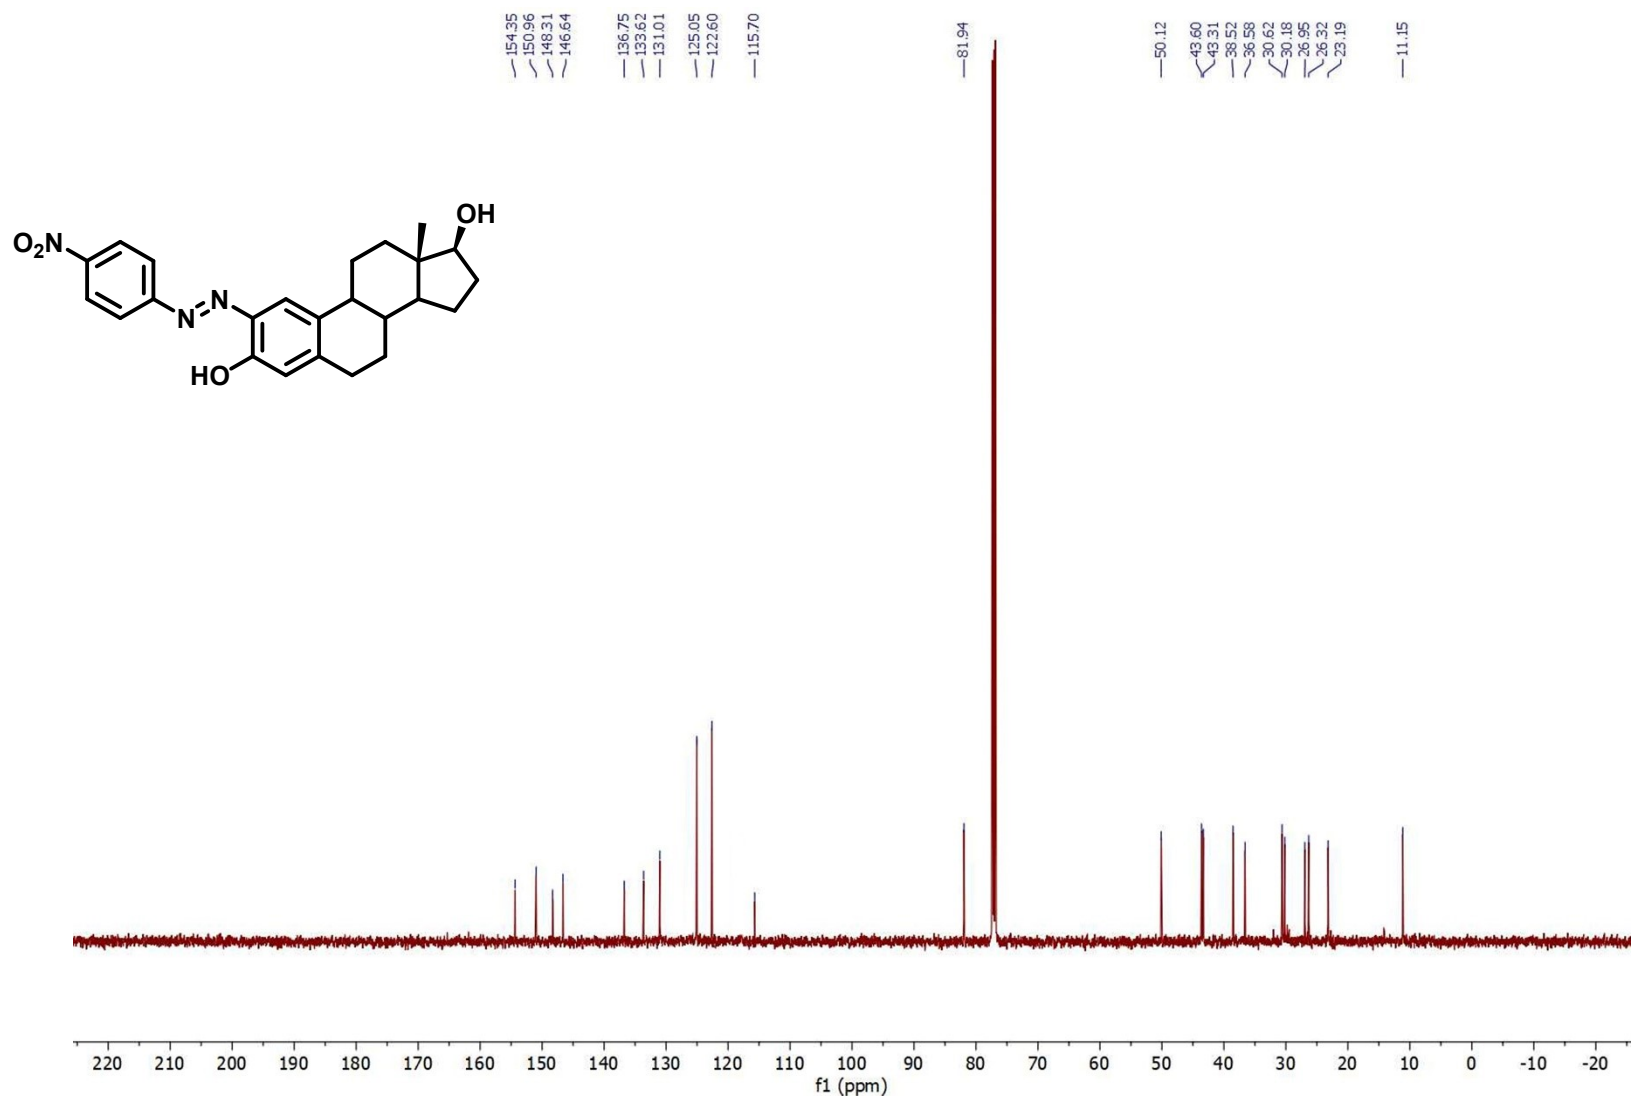

Figure S54 <sup>13</sup>C-NMR spectrum of compound 12a

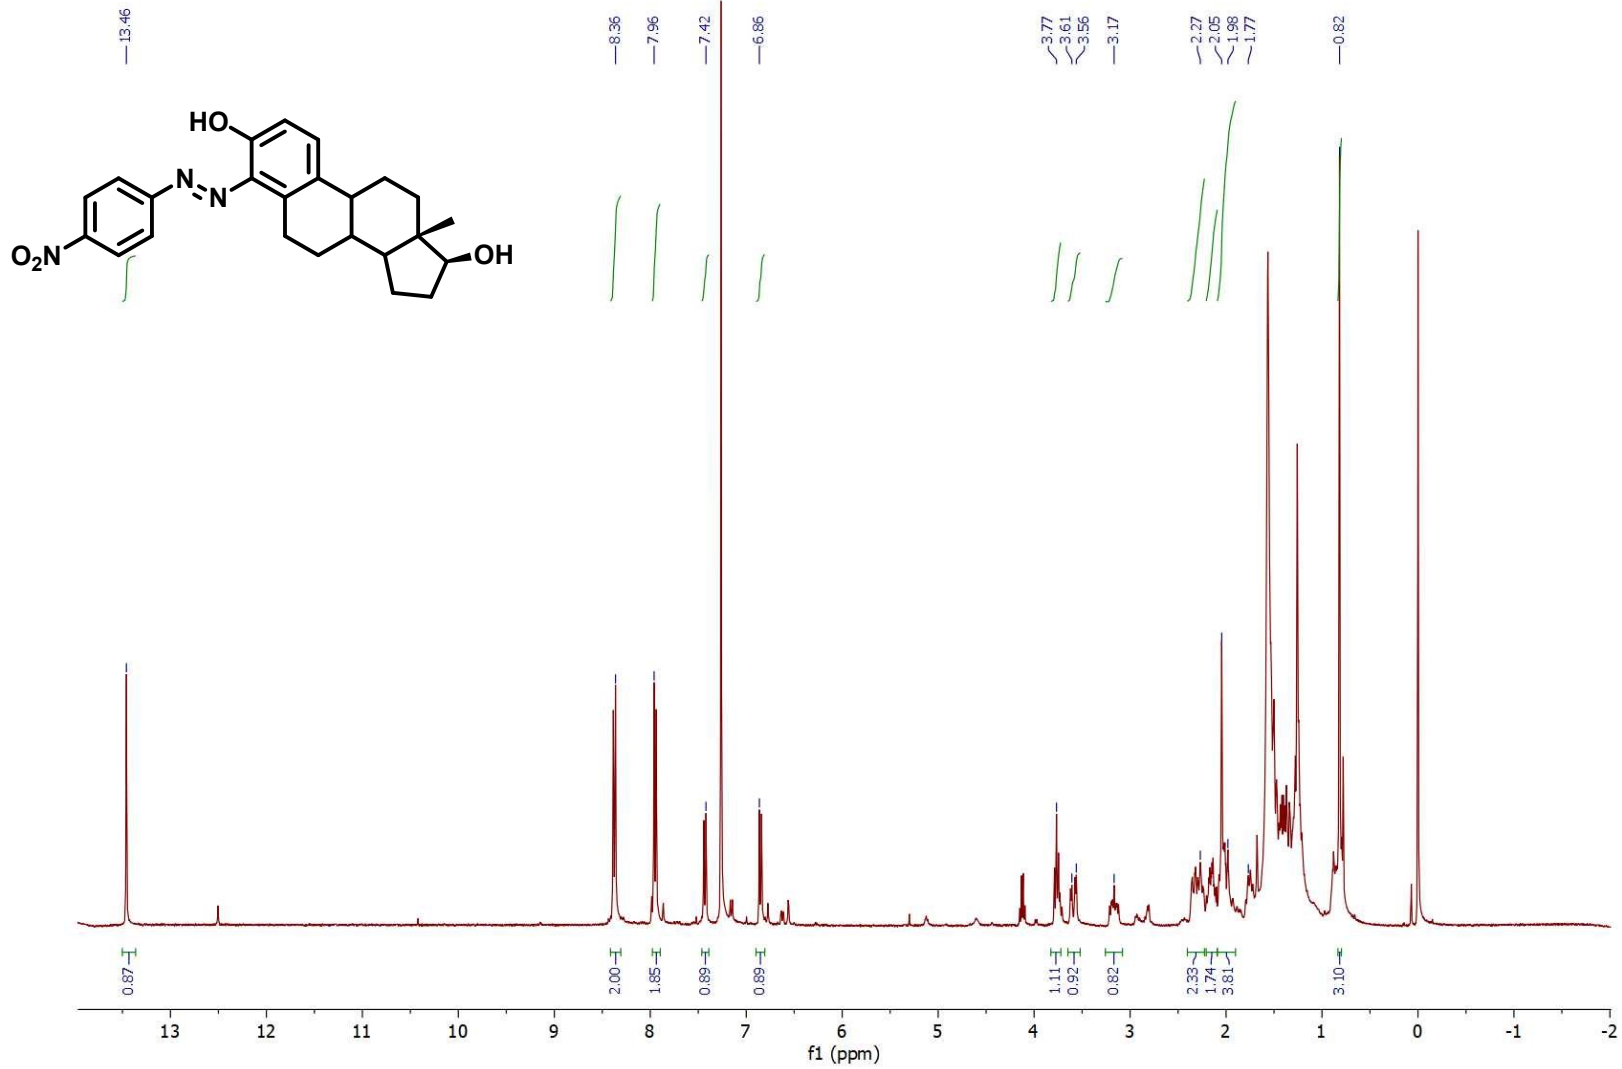

Figure S55 <sup>1</sup>H-NMR spectrum of compound 12b

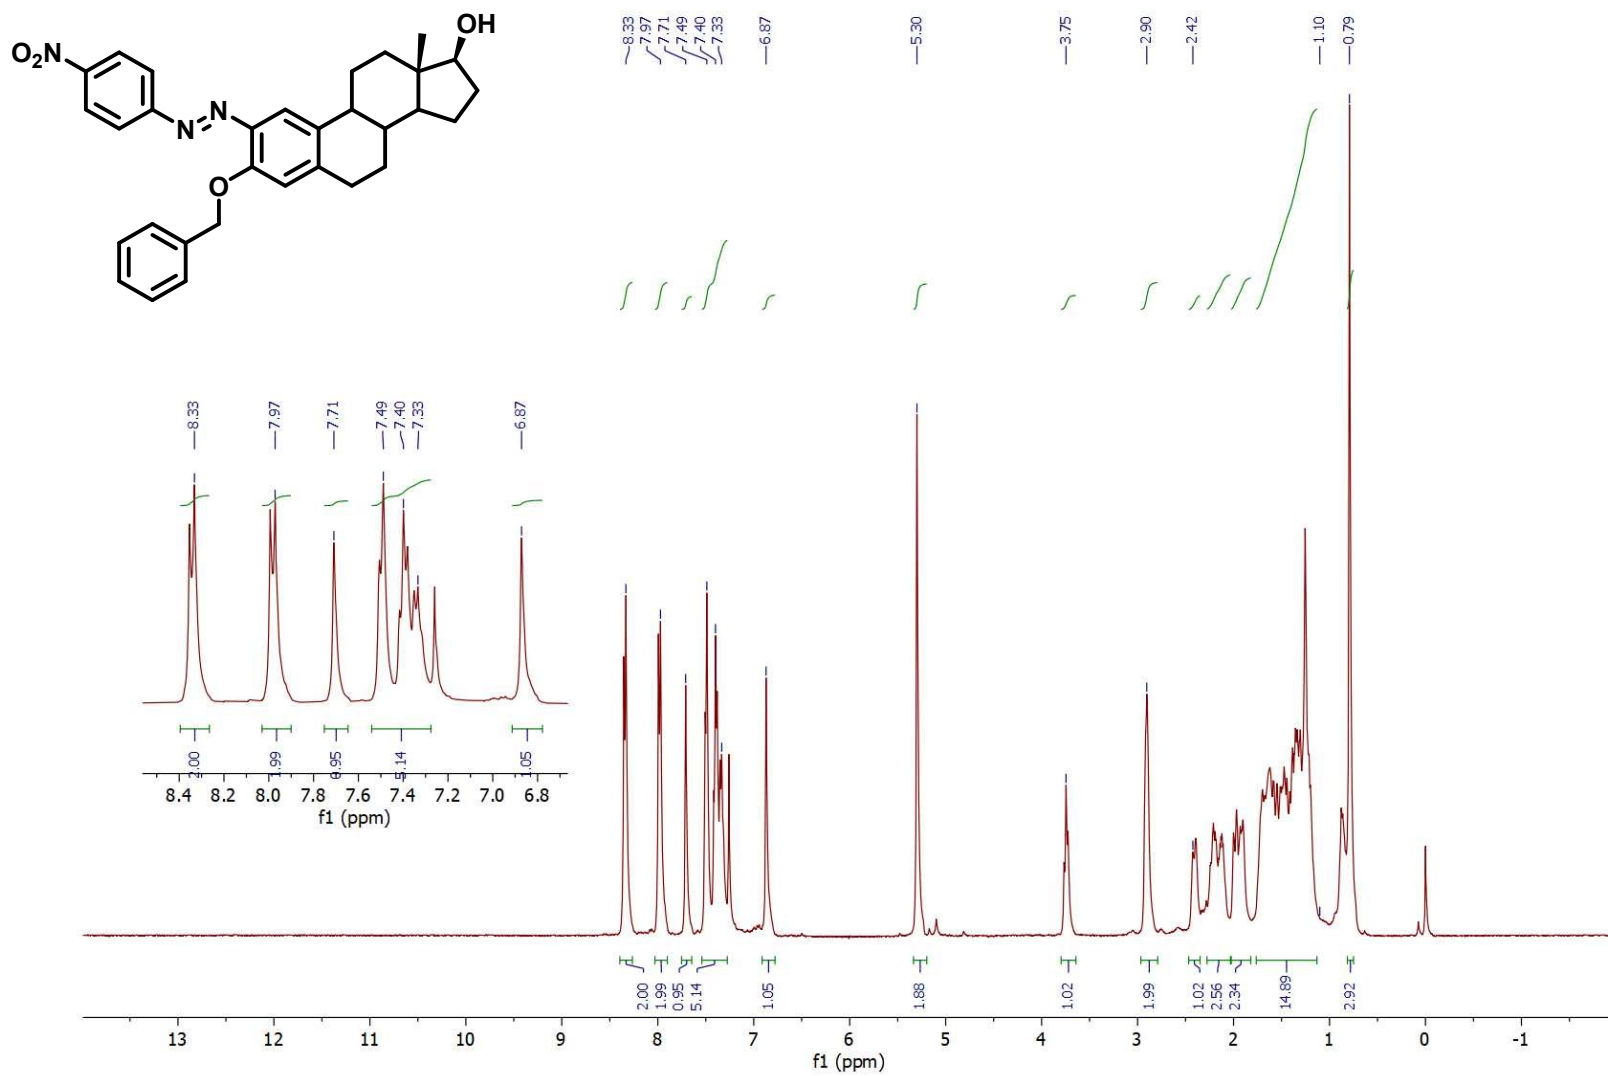

Figure S56  $^1\text{H-NMR}$  spectrum of 3-(Benzyloxy)-2-(4-nitrophenyl)diazinyloestradiol

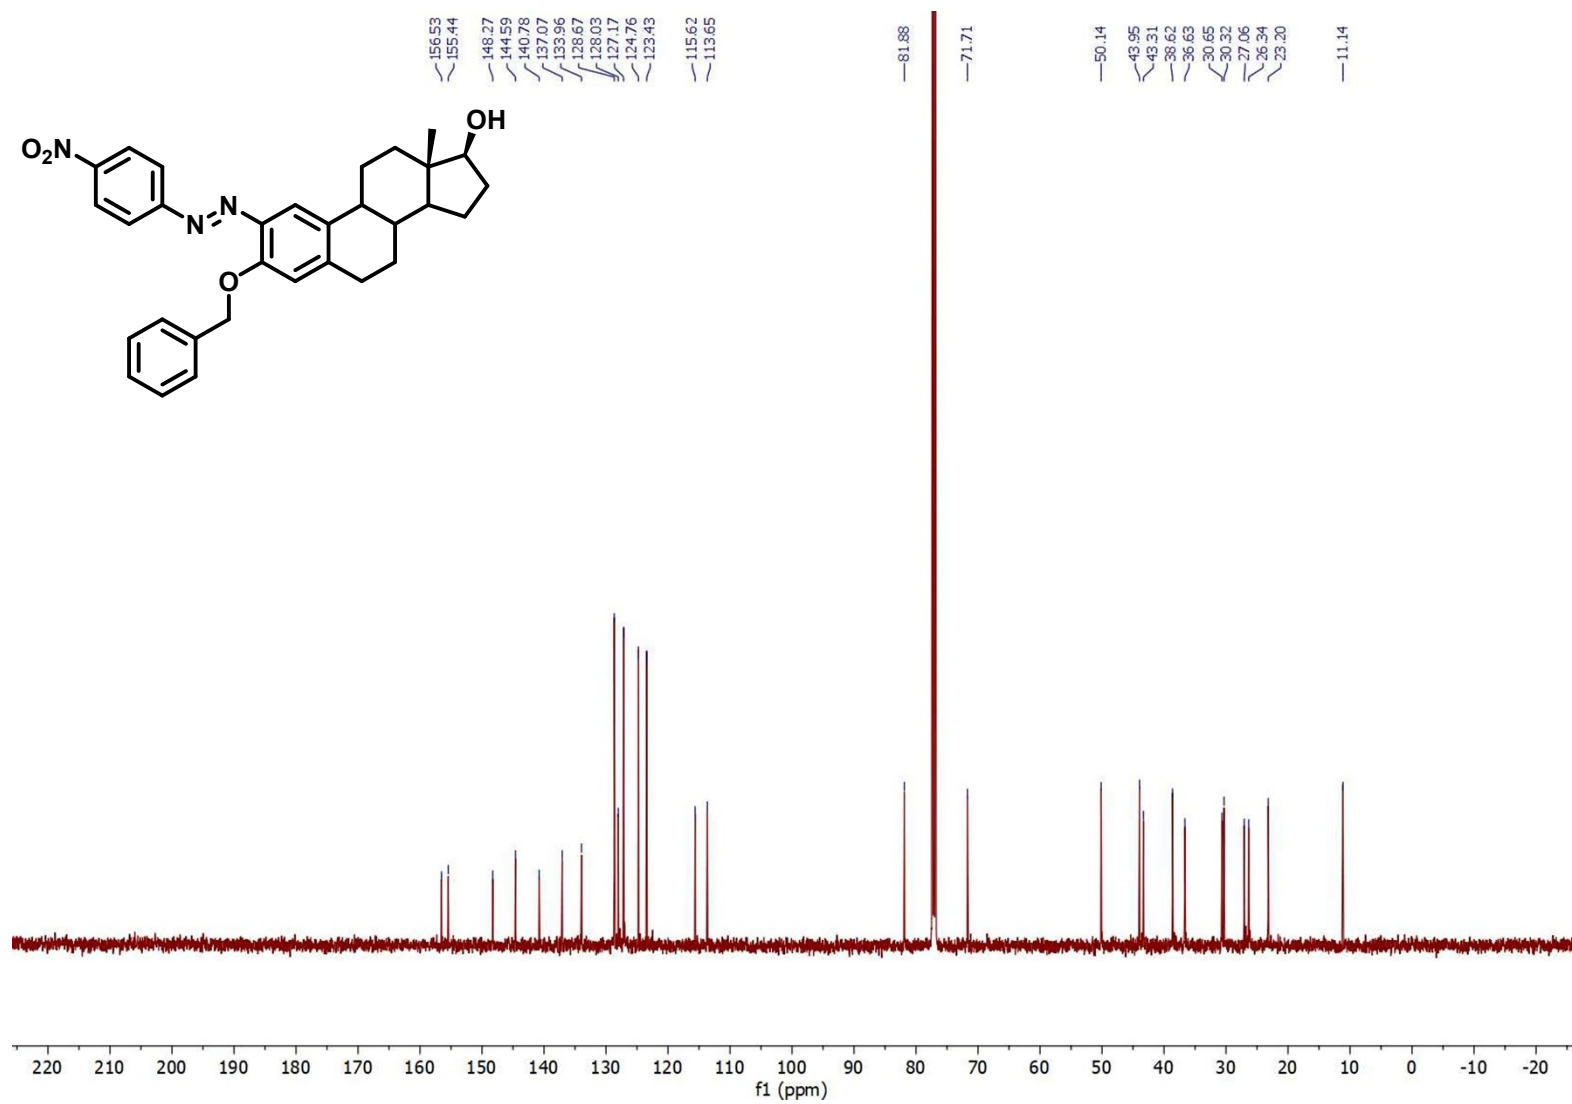

Figure S57 <sup>13</sup>C-NMR spectrum of 3-(Benzyloxy)-2-(4-nitrophenyl)diazinyl)estradiol

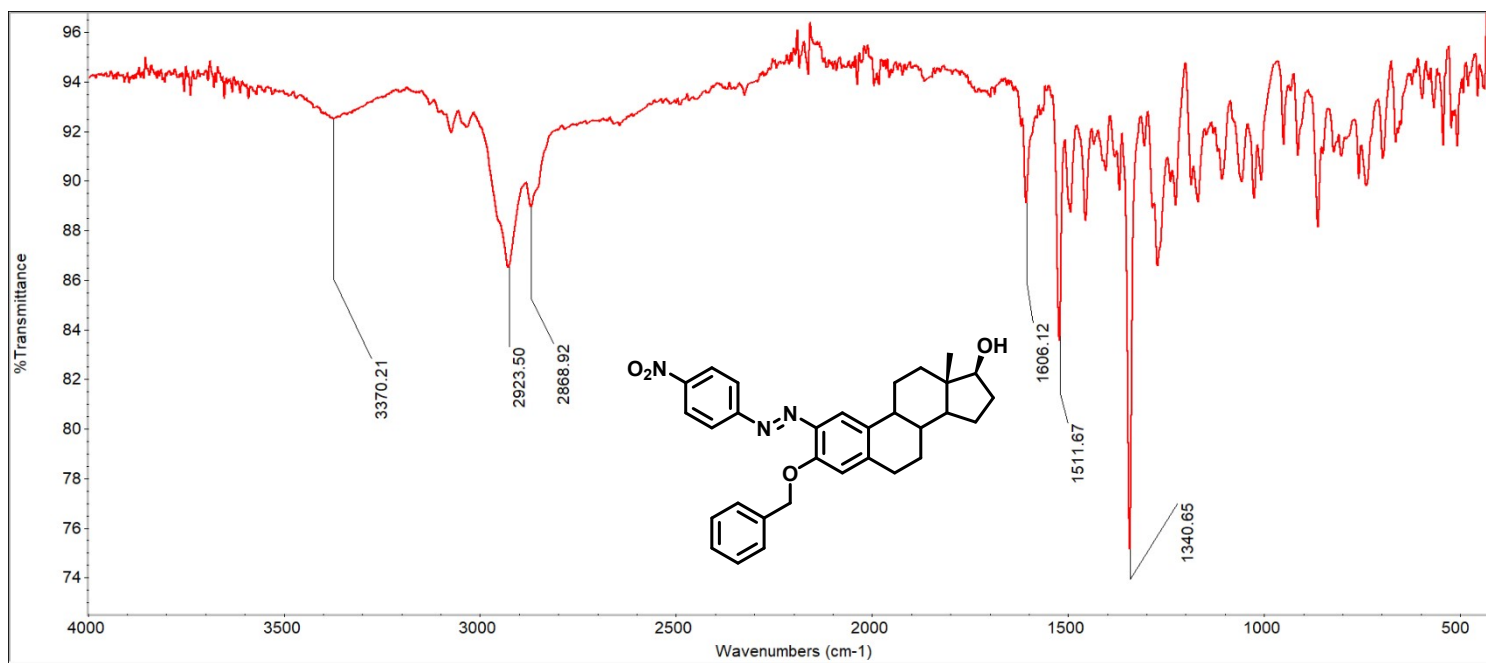

Figure S58 FTIR-spectrum of 3-(Benzyloxy)-2-(4-nitrophenyl)diazinylestrodiol



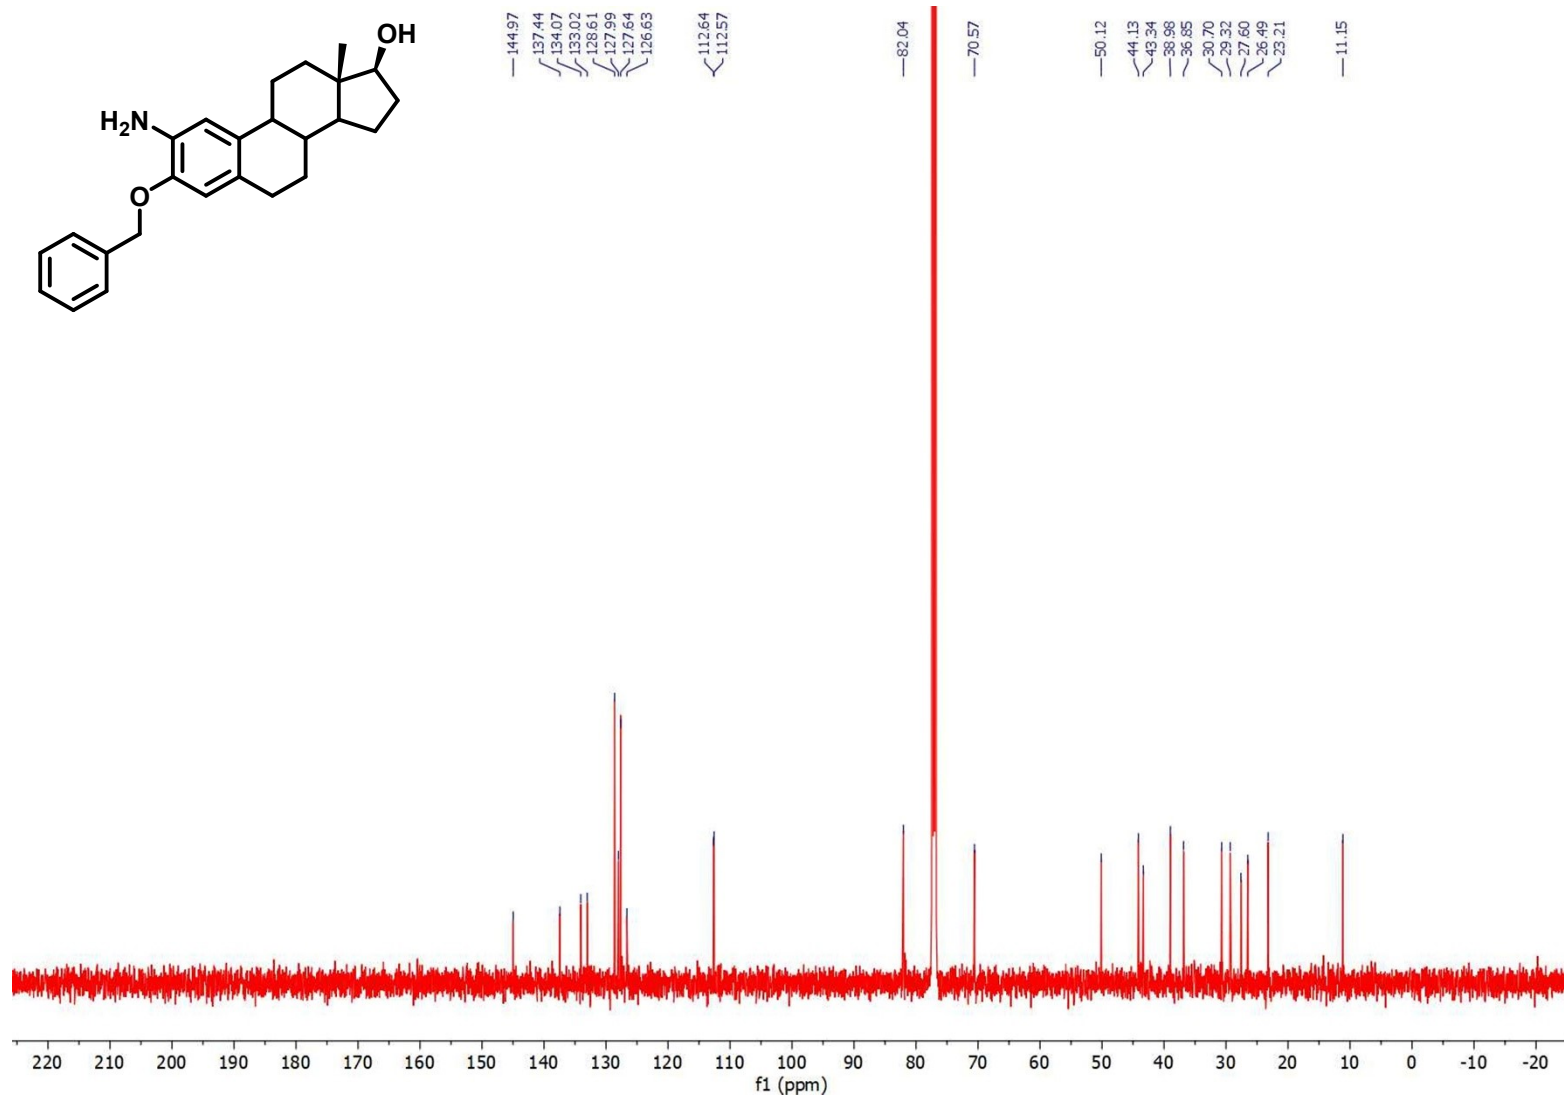

Figure S60 <sup>13</sup>C-NMR spectrum of compound 13

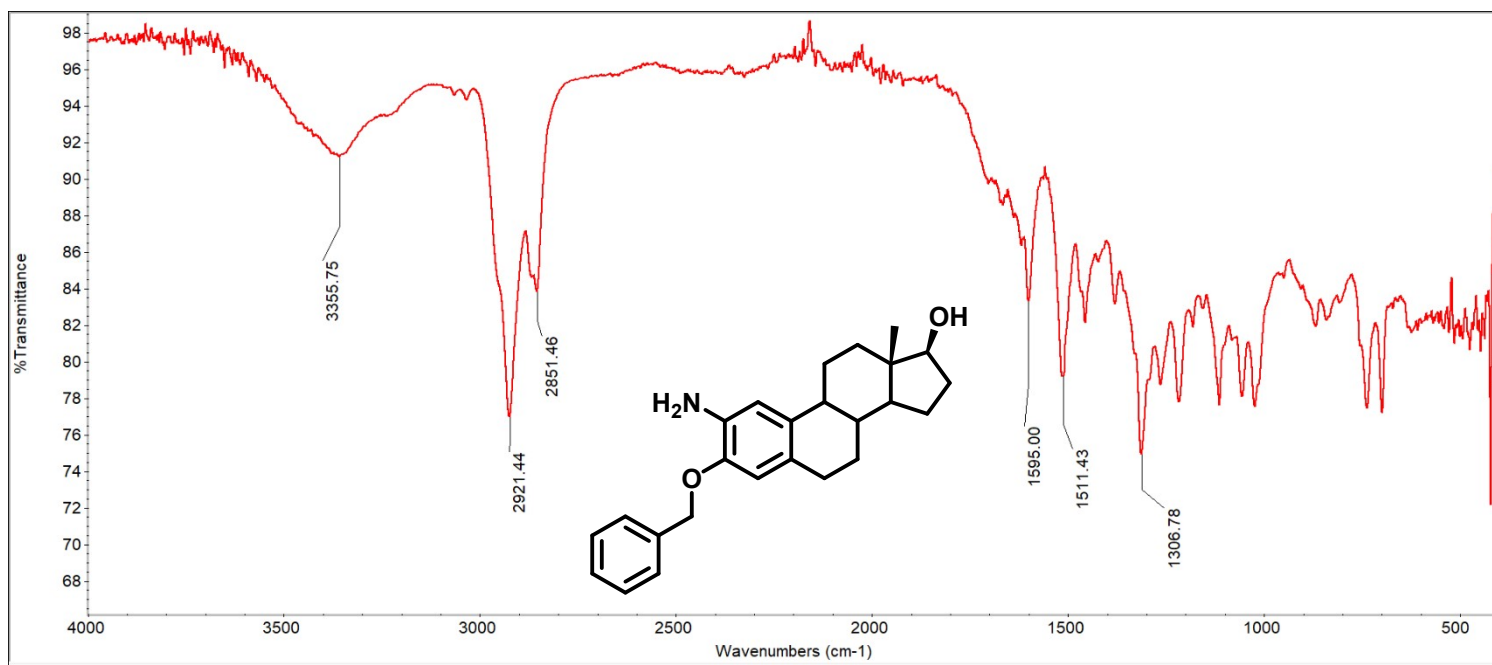

Figure S61 FTIR-spectrum of **compound 13**

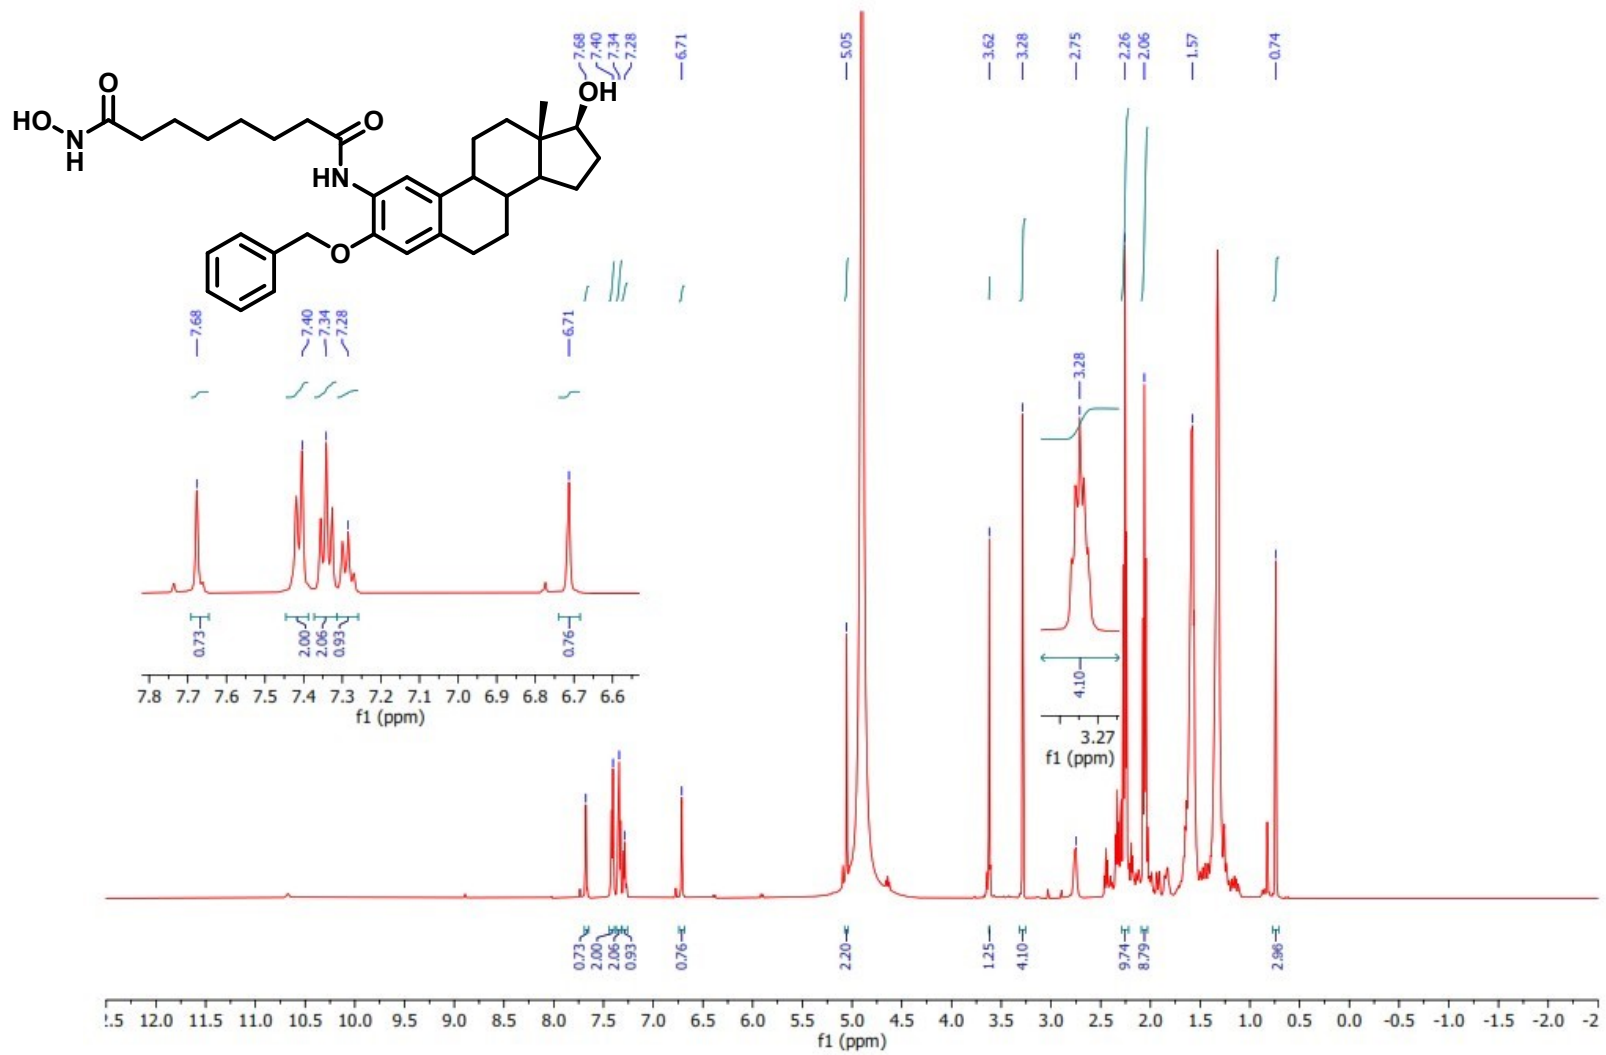

Figure S62  $^1\text{H-NMR}$  spectrum of compound 14

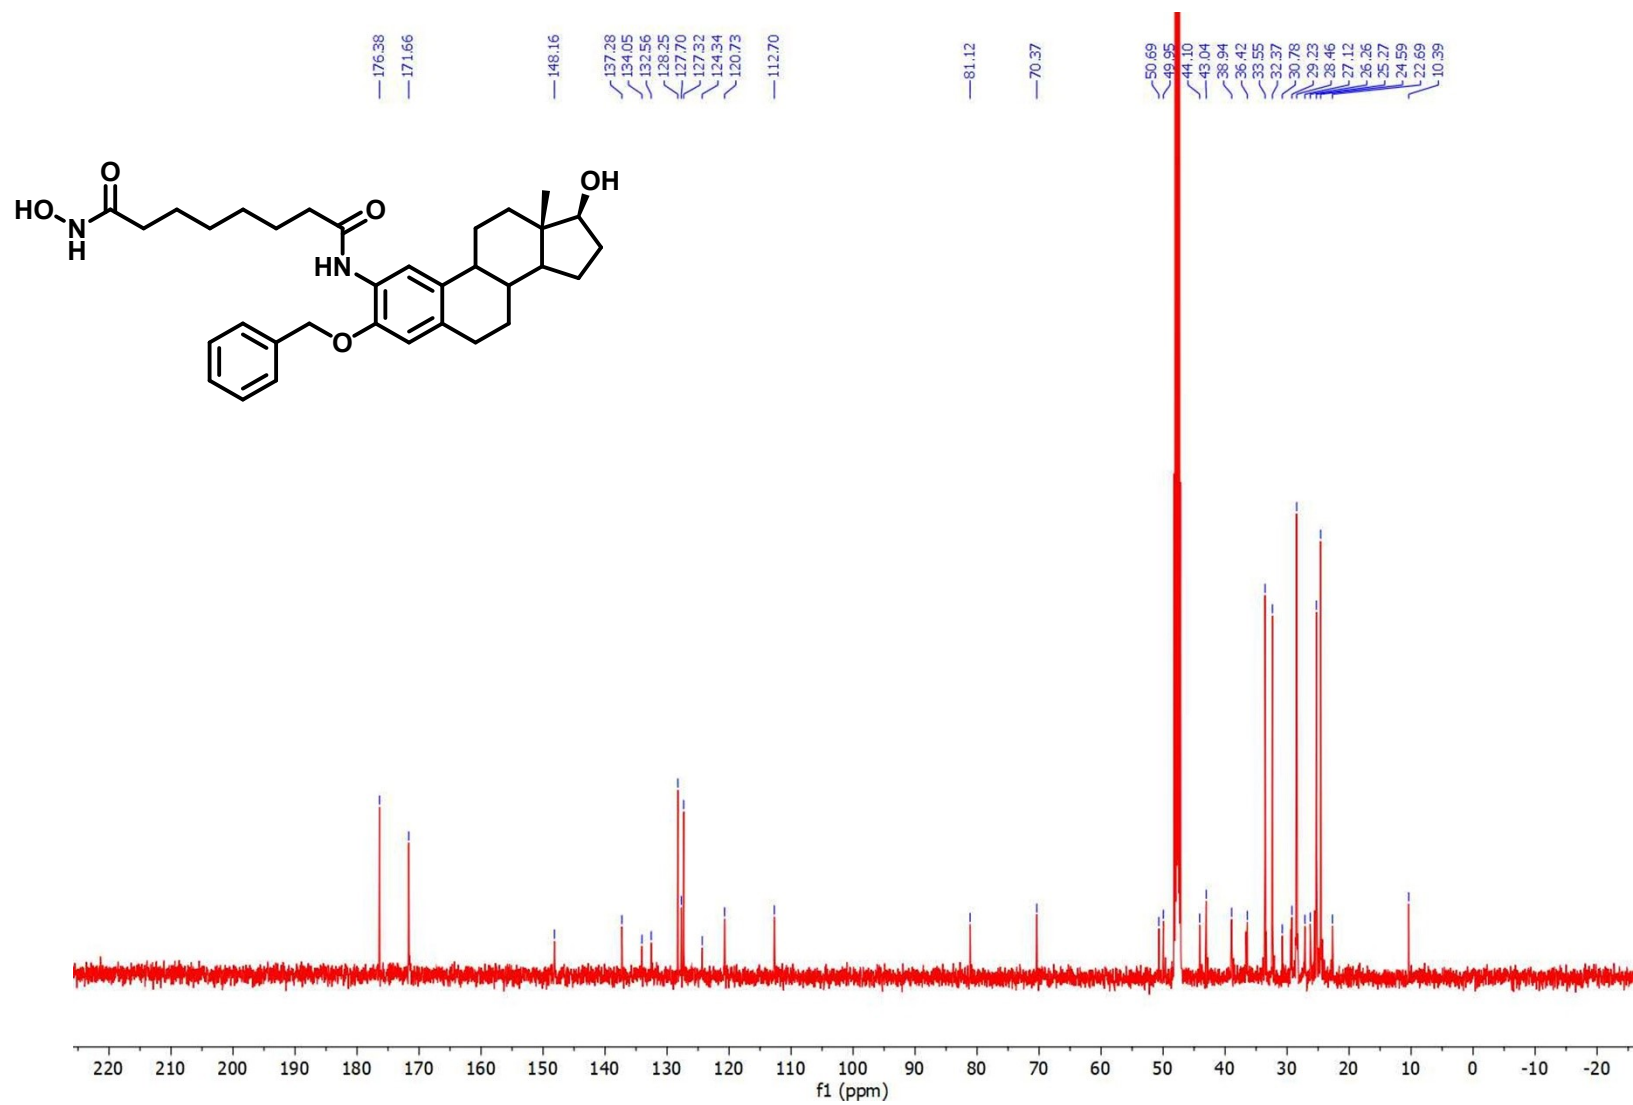

Figure S63 <sup>13</sup>C-NMR spectrum of compound 14

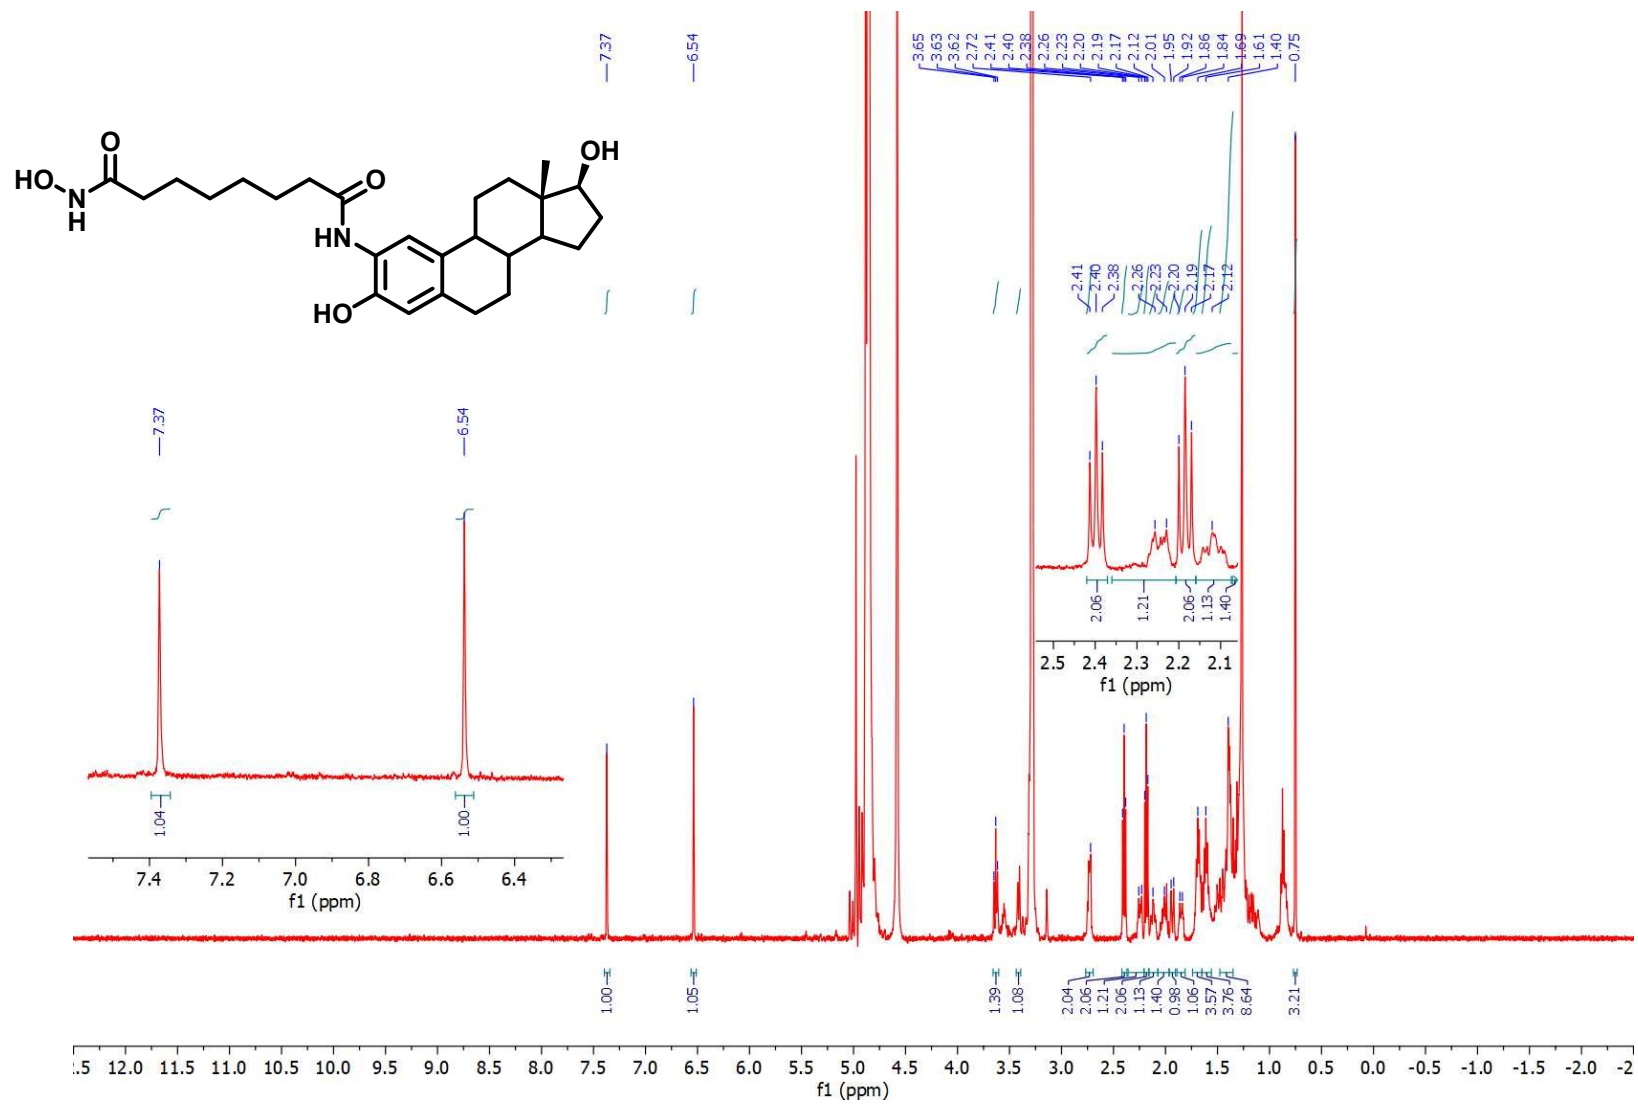

Figure S64 <sup>1</sup>H-NMR spectrum of 2-SEHA

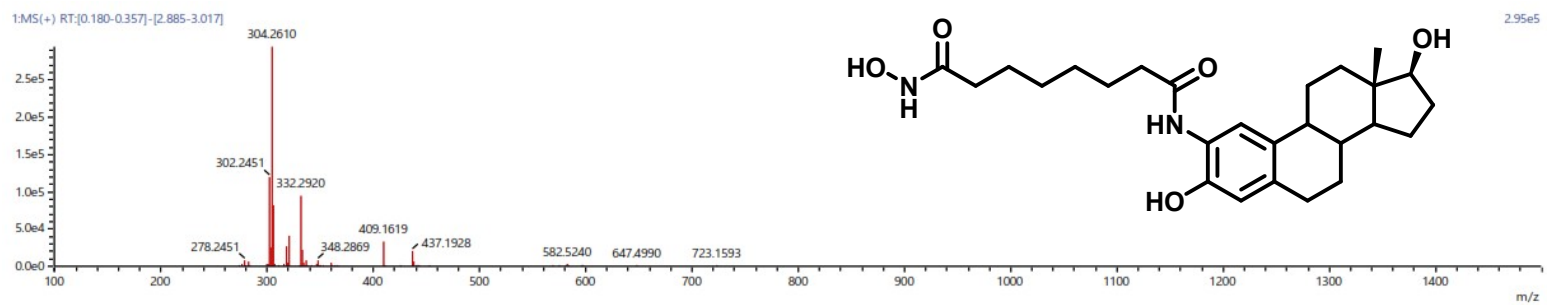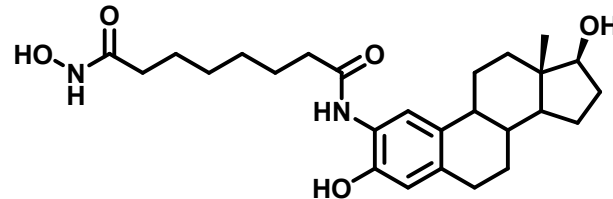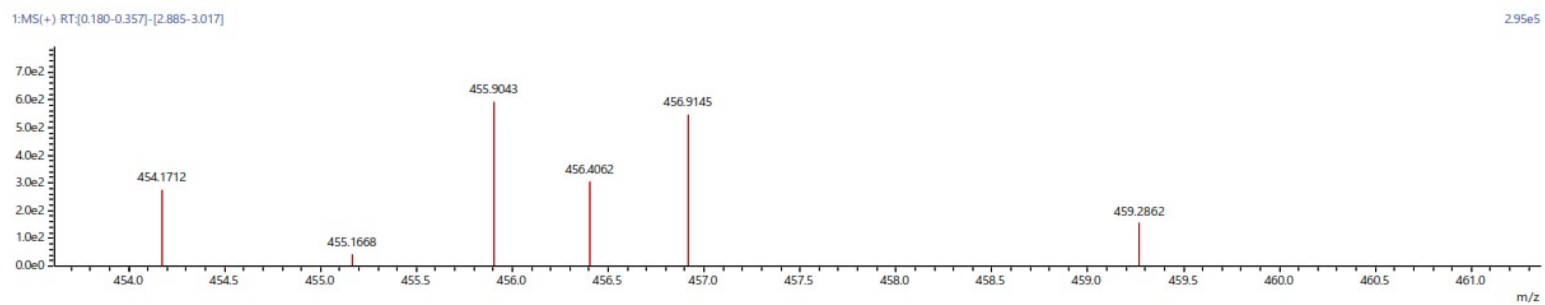

Figure S65 HRMS spectrum of 2-SEHA

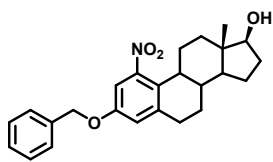

Benzyl-protected compound **9**

**A) COSY-**

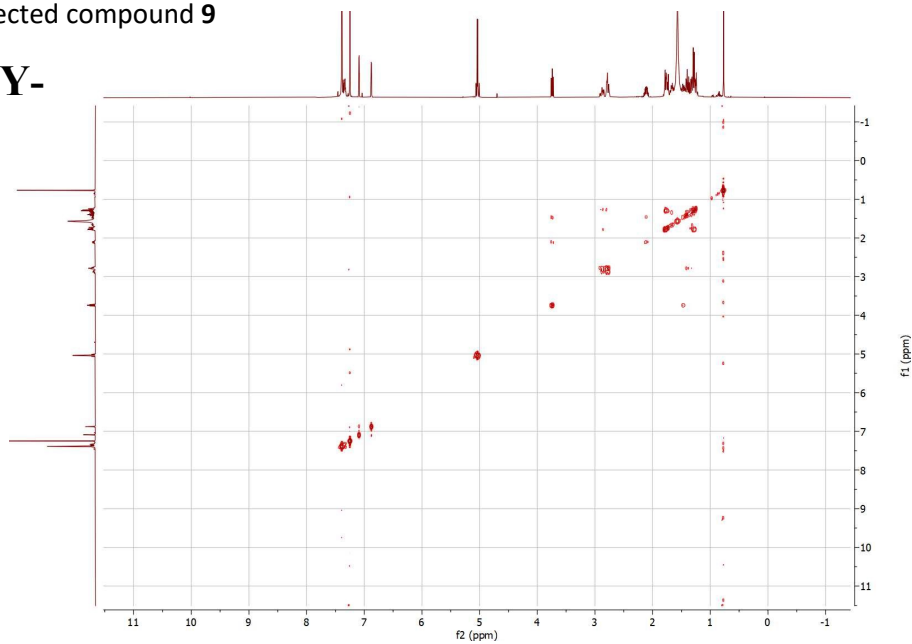

**B)**

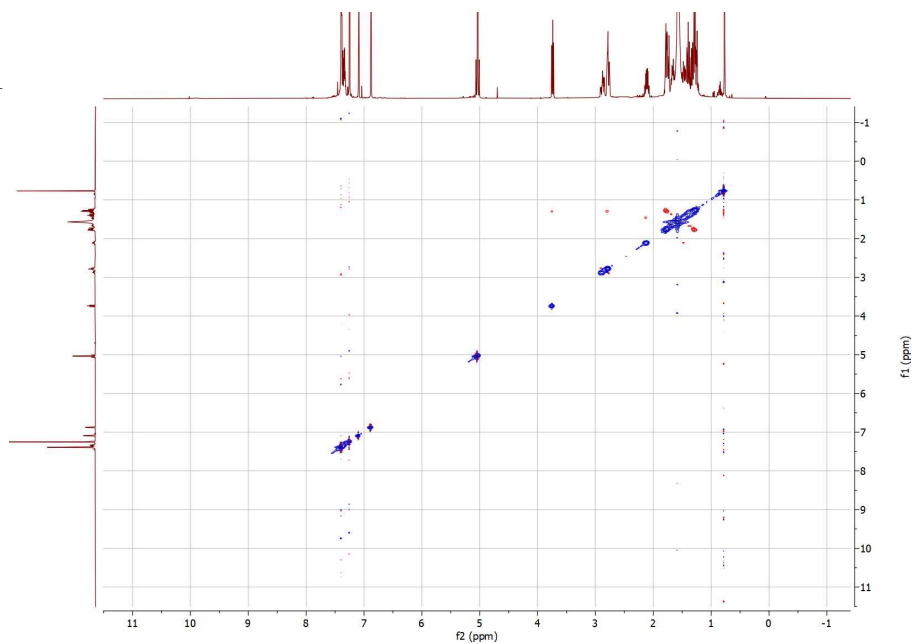

**Figure S66** 2D-NMR of benzyl-protected compound **9** A) COSY B) NOESY

**A)**

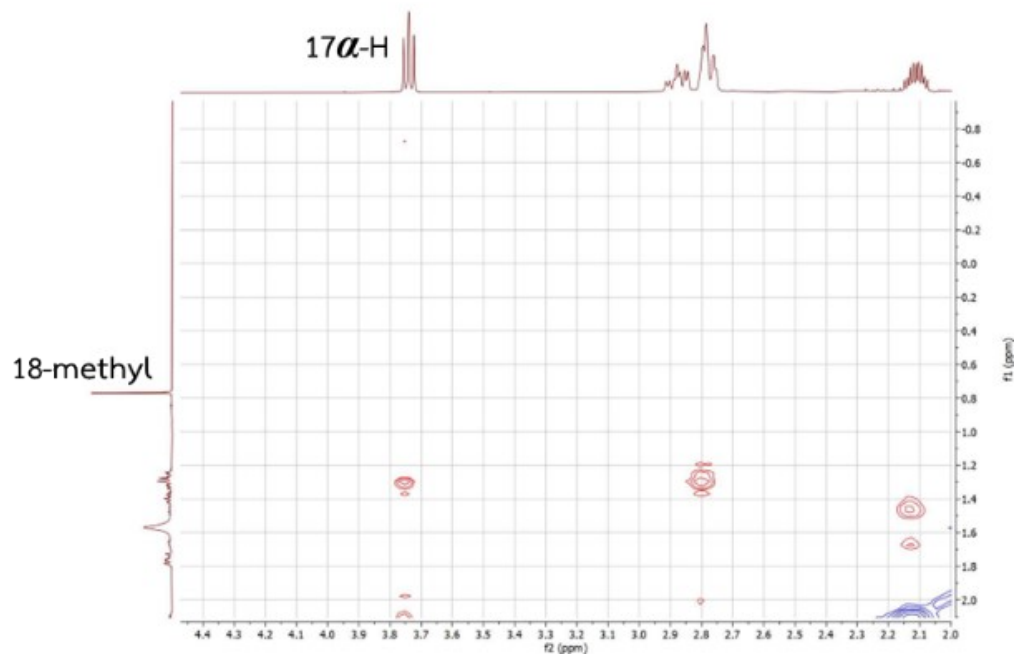

**B)**

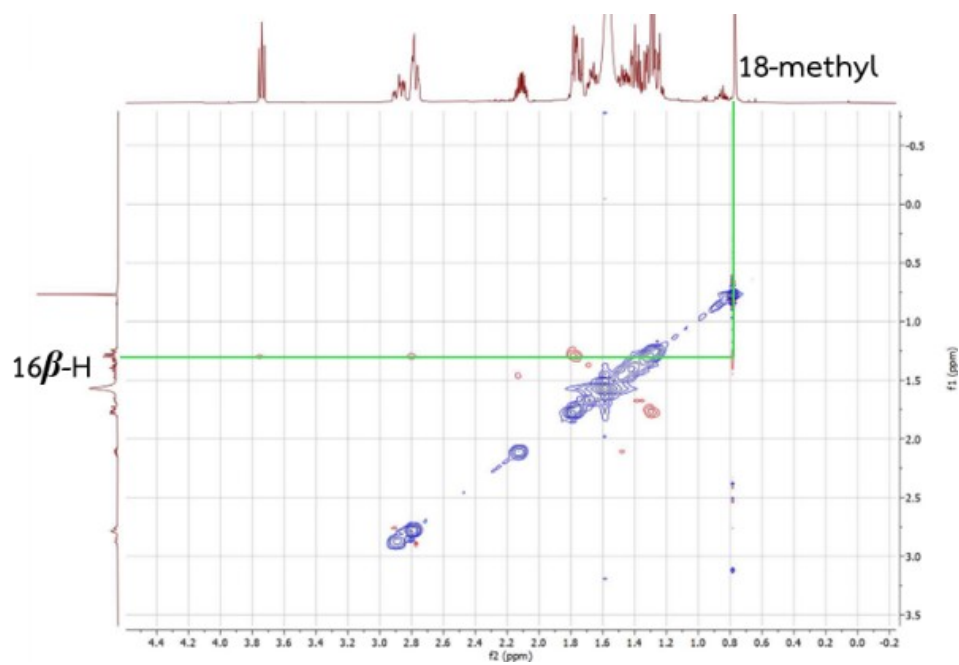

**Figure S67** NOESY spectrum of benzyl-protected compound **9** showing NOE correlations between **A)** 18-methyl group and 17-H **B)** 18-methyl group with 16 $\beta$ -H

# Molecular Docking

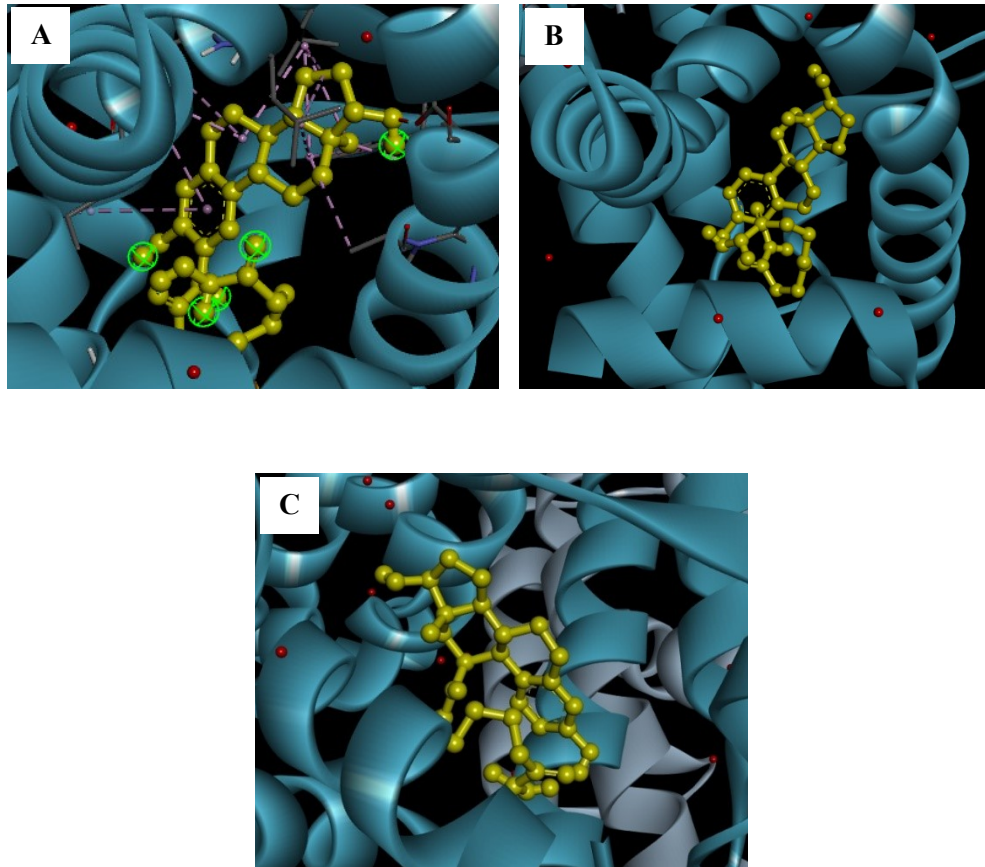

Figure S68 3D complex of A) 2-SEHA B) 4-SEHA C) 11-SEHA with ER

**A**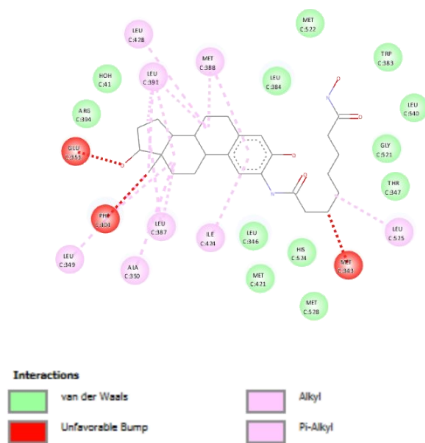**B**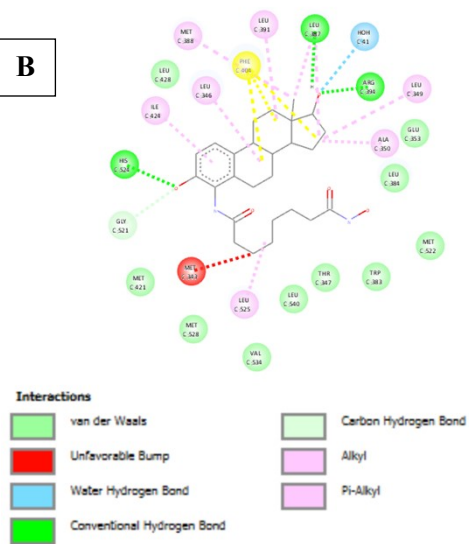**C**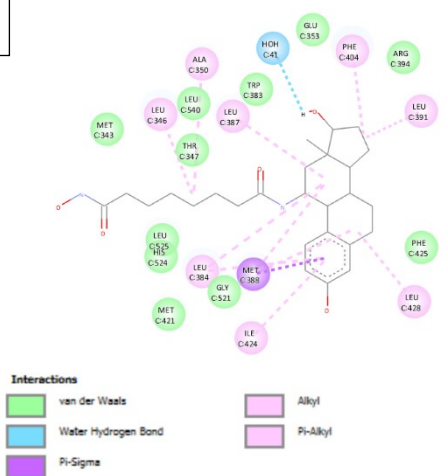

**Figure S69** Interaction of the ligand **A) 2-SEHA B) 4-SEHA C) 11-SEHA** with ER

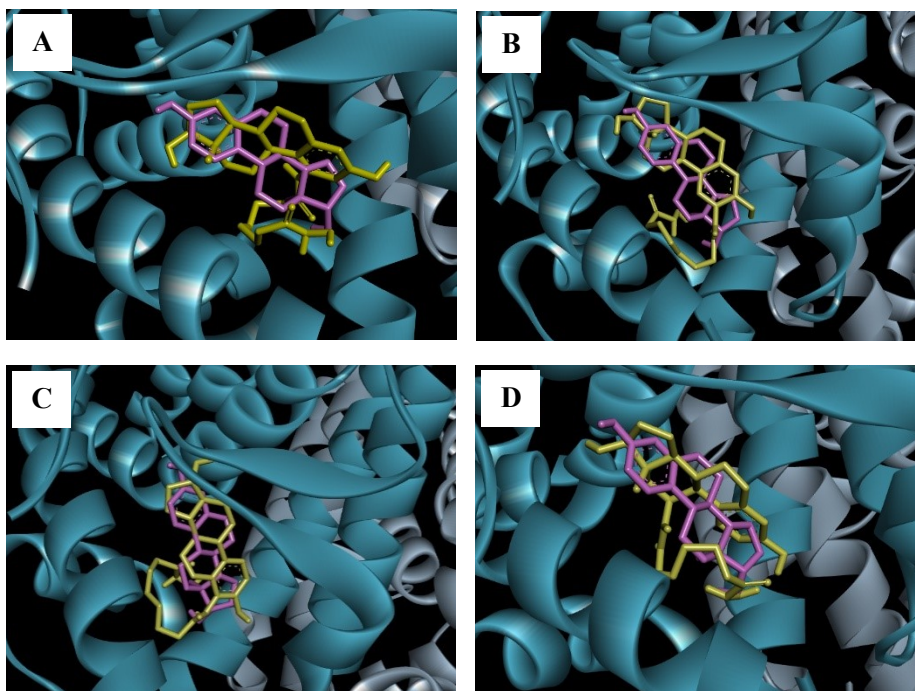

**Figure S70** The orientation of target ligand (yellow structure) **A) 1-SEHA B) 2-SEHA** compared with unmodified estradiol (pink structure)

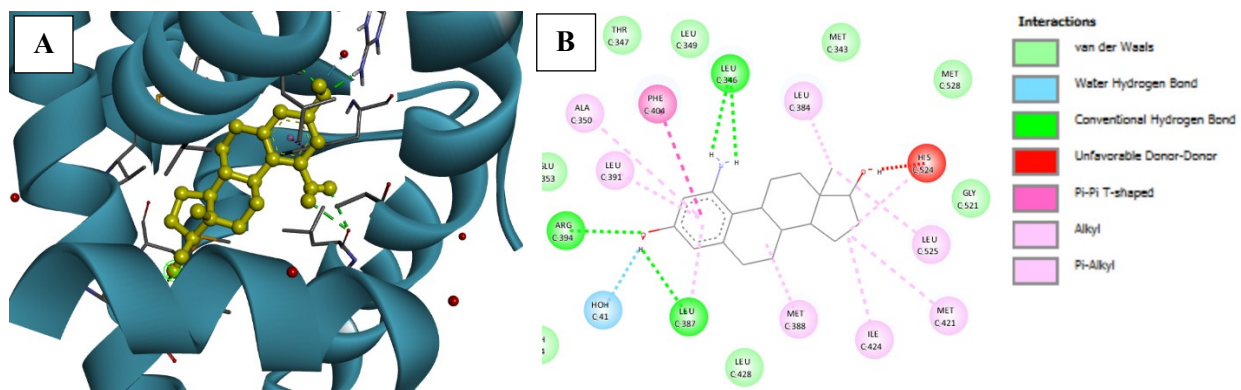

**Figure S71** The orientation of target ligand **A)** 3D complex of 1-NH<sub>2</sub>-E2 with ER **B)** the interaction of 1-NH<sub>2</sub>-E2 with ER

**Table S1** The relative binding affinity (RBA) of the ligands complex with ER

| ligand                       | Affinity(kcal/mol) | RBA (calculated) | RBA (experiment) |
|------------------------------|--------------------|------------------|------------------|
| estradiol                    | -10.6              | 100              | 100              |
| 1-NH <sub>2</sub> -estradiol | -10.7              | 100              | -                |

## The bioactivity test

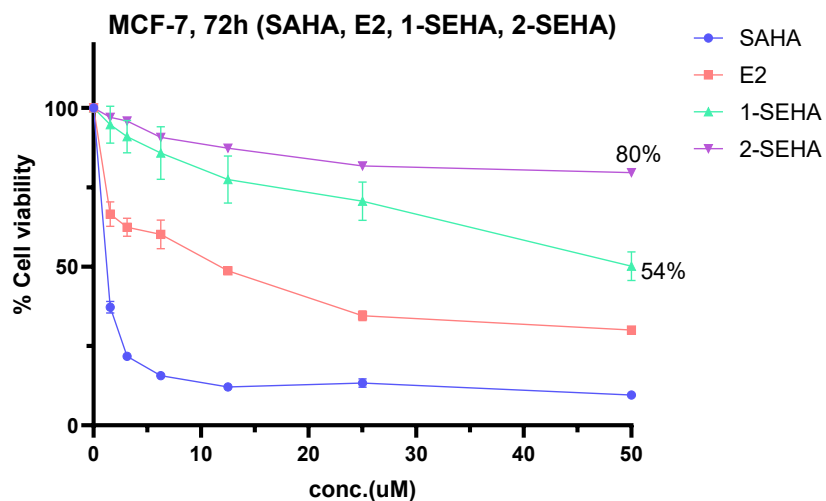

**Figure S72** %cell viability of compound **SAHA** (blue), **E2** (pink), **1-SEHA** (green), **2-SEHA** (purple) against MCF-7 for 72h

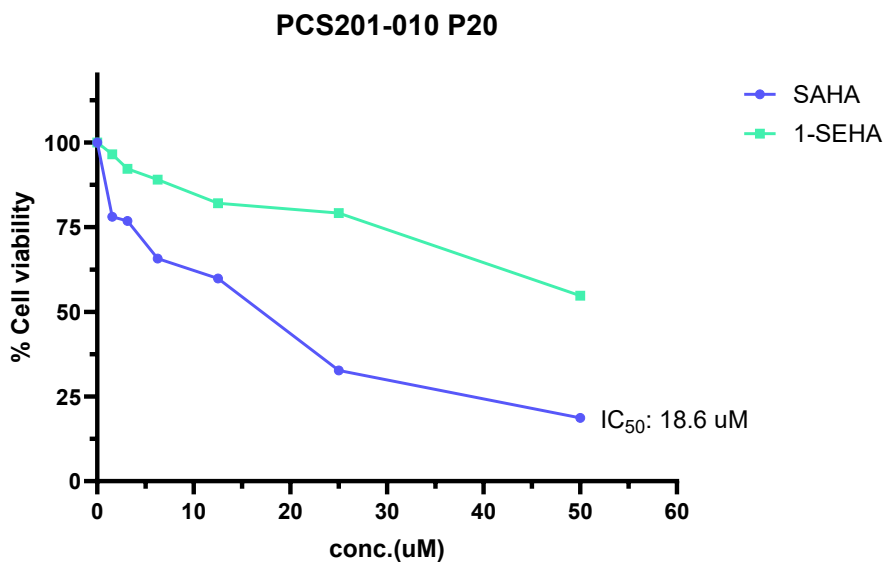

**Figure S73** %cell viability of compound **SAHA** (blue) and **1-SEHA** (green) against PCS201-010 (normal cells)

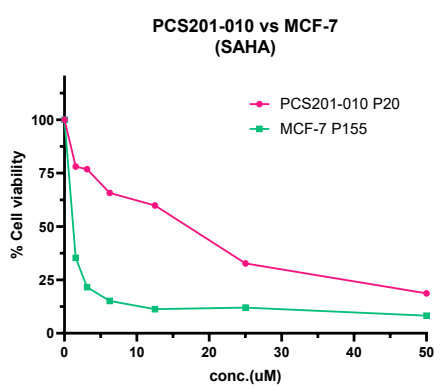

**A**

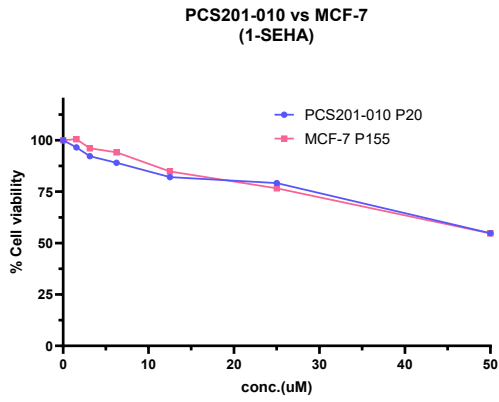

**B**

**Figure S74** %cell viability of PCS201-010 compared to MCF-7 (A) SAHA, (B) 1-SEHA

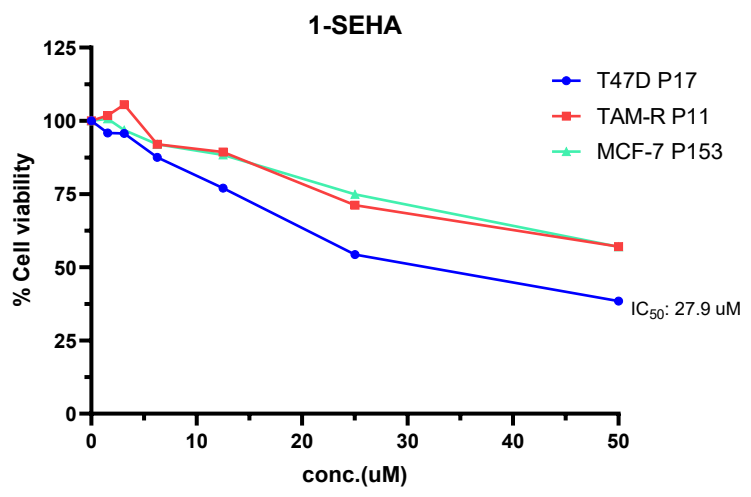

**Figure S75** %cell viability of 1-SEHA against 2 cells: T47D (blue line) and TAM-R (red line) at 24h
